# Supplementary material for: Does Hazardous-Waste Testing Follow Technical Guidance, Thus Help Protect Environmental Justice and Health?
Source: Int J Environ Res Public Health. 2022 Jun 23;19(13):7679. doi: 10.3390/ijerph19137679 (PMC9265884; doi:10.3390/ijerph19137679)

**Contents of Supplemental File S1a**

|                     | <b>Pages</b> |
|---------------------|--------------|
| <b>Figures.....</b> | <b>1-20</b>  |
| Figure S1.....      | 2            |
| Figure S2.....      | 3            |
| Figure S3.....      | 4            |
| Figure S4.....      | 5            |
| Figure S5.....      | 6            |
| Figure S6.....      | 7            |
| Figure S7.....      | 8            |
| Figure S8.....      | 9            |
| Figure S9.....      | 10           |

**Contents of Supplemental File S1b**

|                 |    |
|-----------------|----|
| Figure S10..... | 11 |
| Figure S11..... | 12 |
| Figure S12..... | 13 |
| Figure S13..... | 14 |
| Figure S14..... | 15 |
| Figure S15..... | 16 |
| Figure S16..... | 17 |
| Figure S17..... | 18 |
| Figure S18..... | 19 |

**Contents of Supplemental File S1c**

|                    |              |
|--------------------|--------------|
| <b>Tables.....</b> | <b>20-33</b> |
| Table S1.....      | 21-23        |
| Table S2.....      | 24-30        |
| Table S3.....      | 31           |
| Table S4.....      | 32           |
| Table S5.....      | 33           |

# FIGURES

Figure S1. “Hot-Spot” Sampling Locations at Former Naval Ordnance Test Station, Pasadena, CA [6, 59], Figure 7.

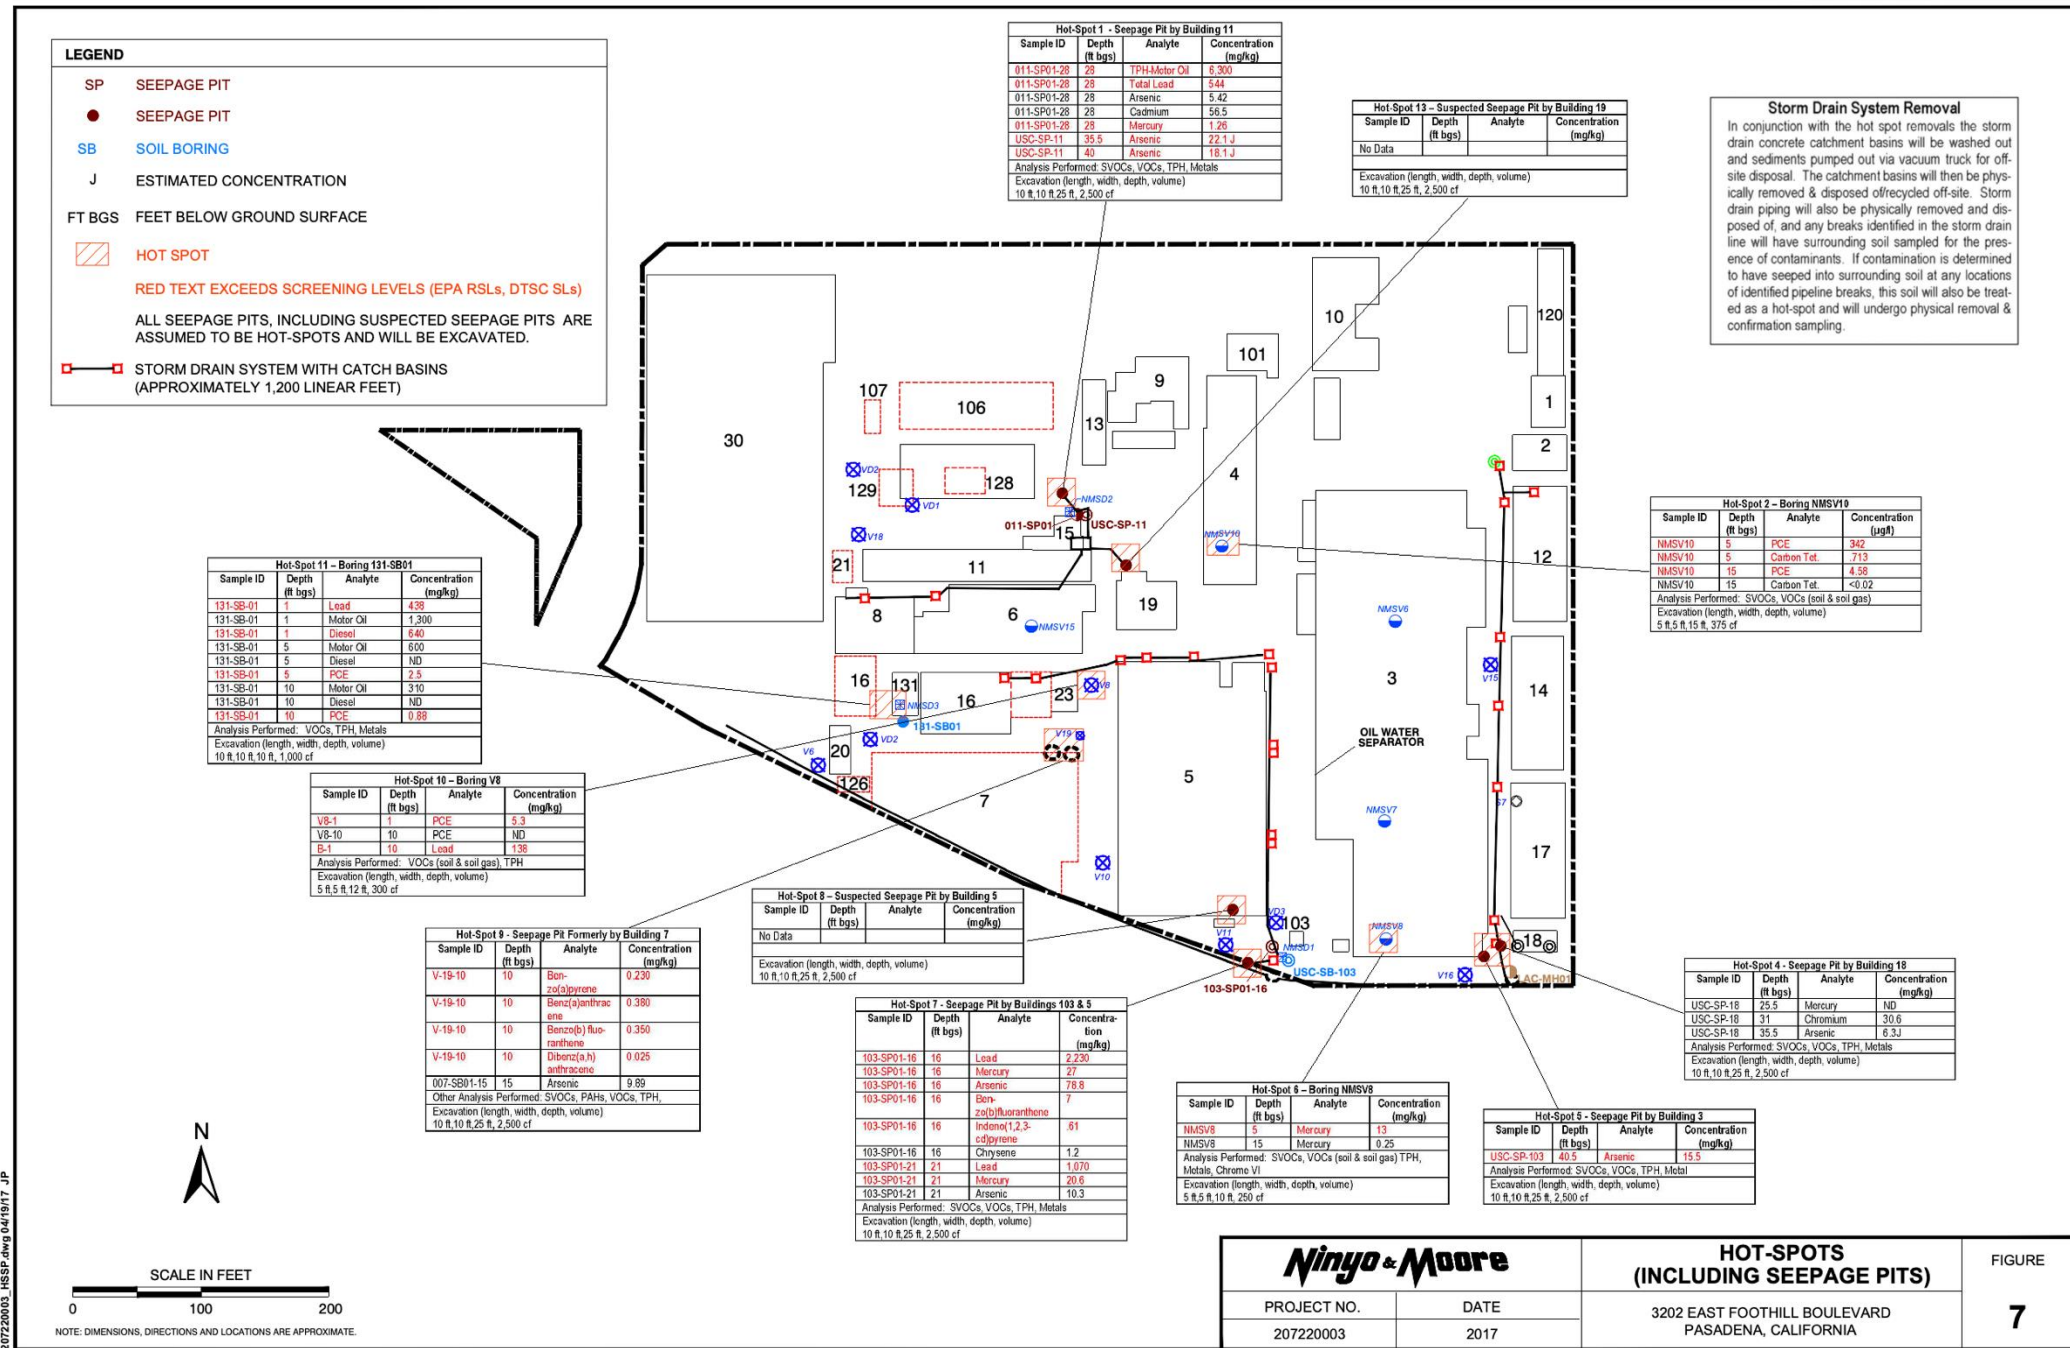

**Figure S2.** Environmental Sampling Locations at Former Naval Ordnance Test Station, Pasadena, CA [6, 58, 59], Figure 4.

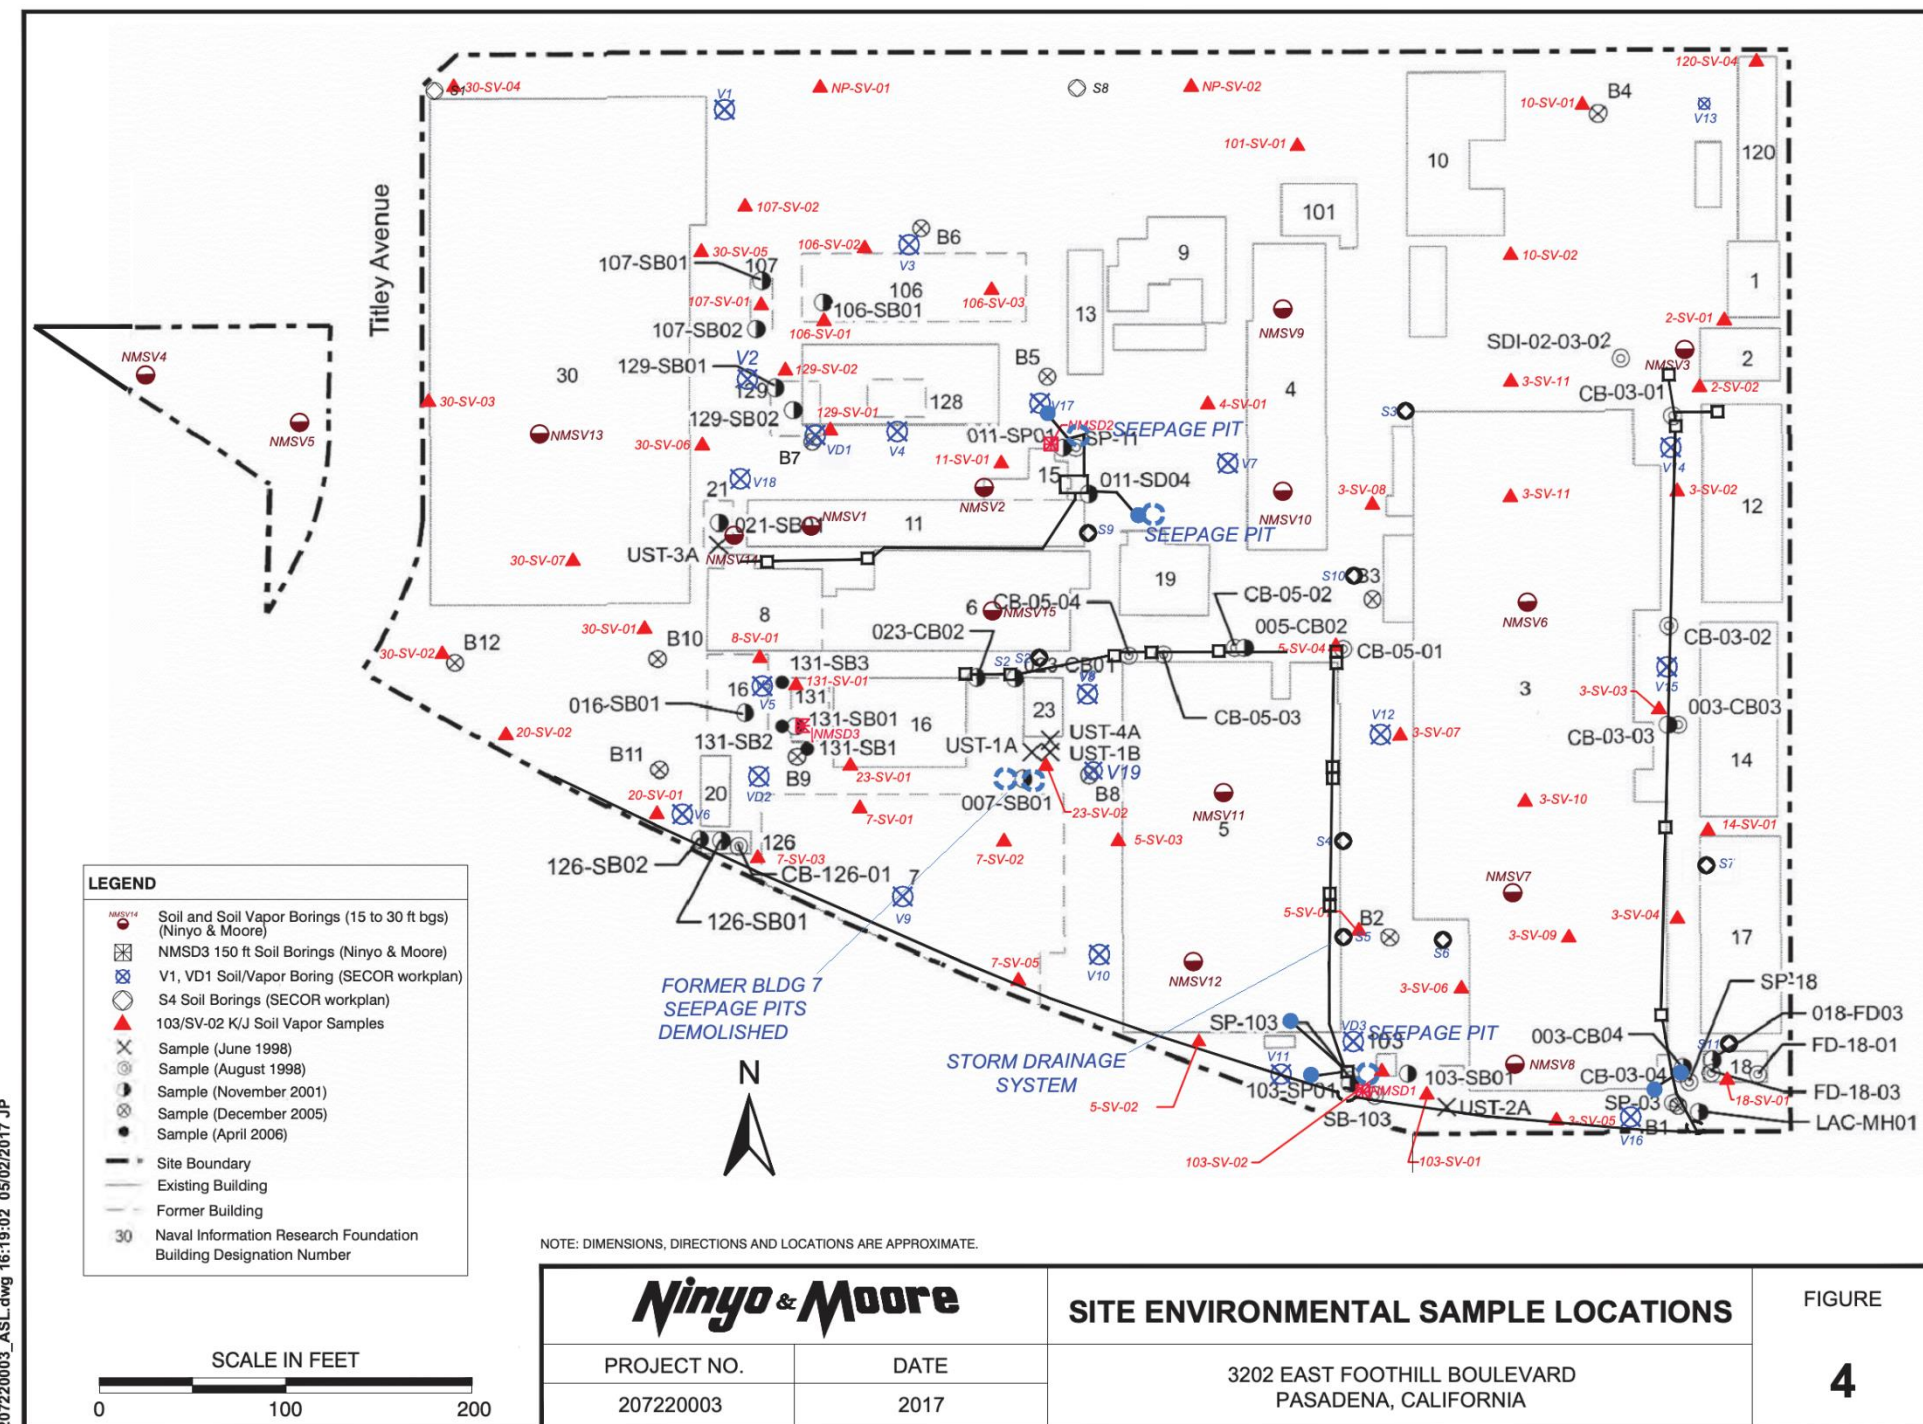

Figure S3. PCE Soil Gas Isoconcentration Map at Former Naval Ordnance Test Station, Pasadena, CA [6, 59], Figure 9.

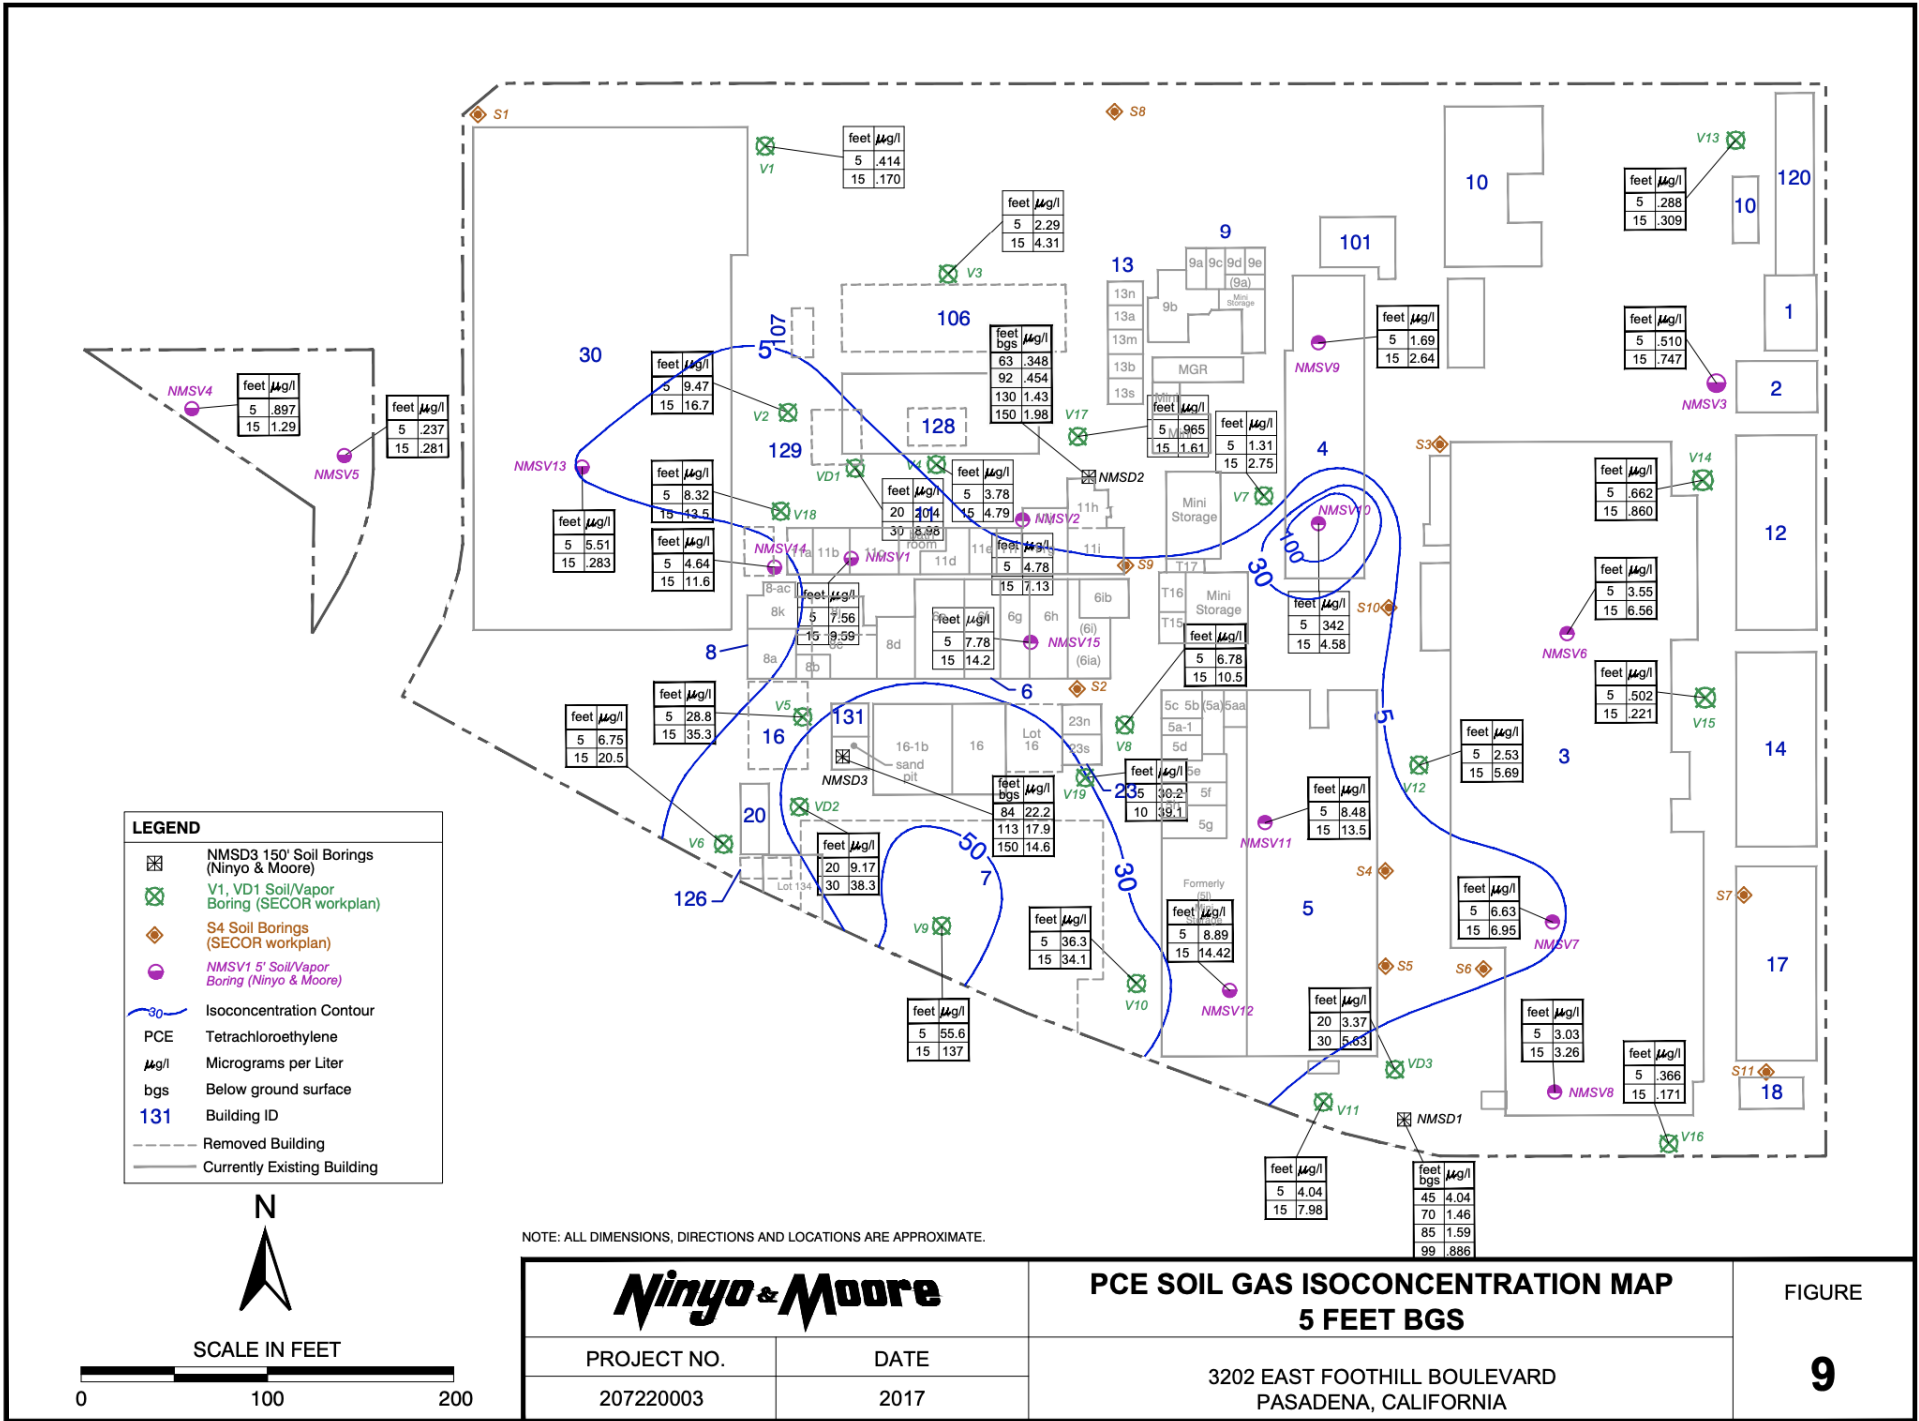

Figure S4. PCE Soil Gas Isoconcentration Map at Former Naval Ordnance Test Station, Pasadena, CA [6, 59], Figure 10.

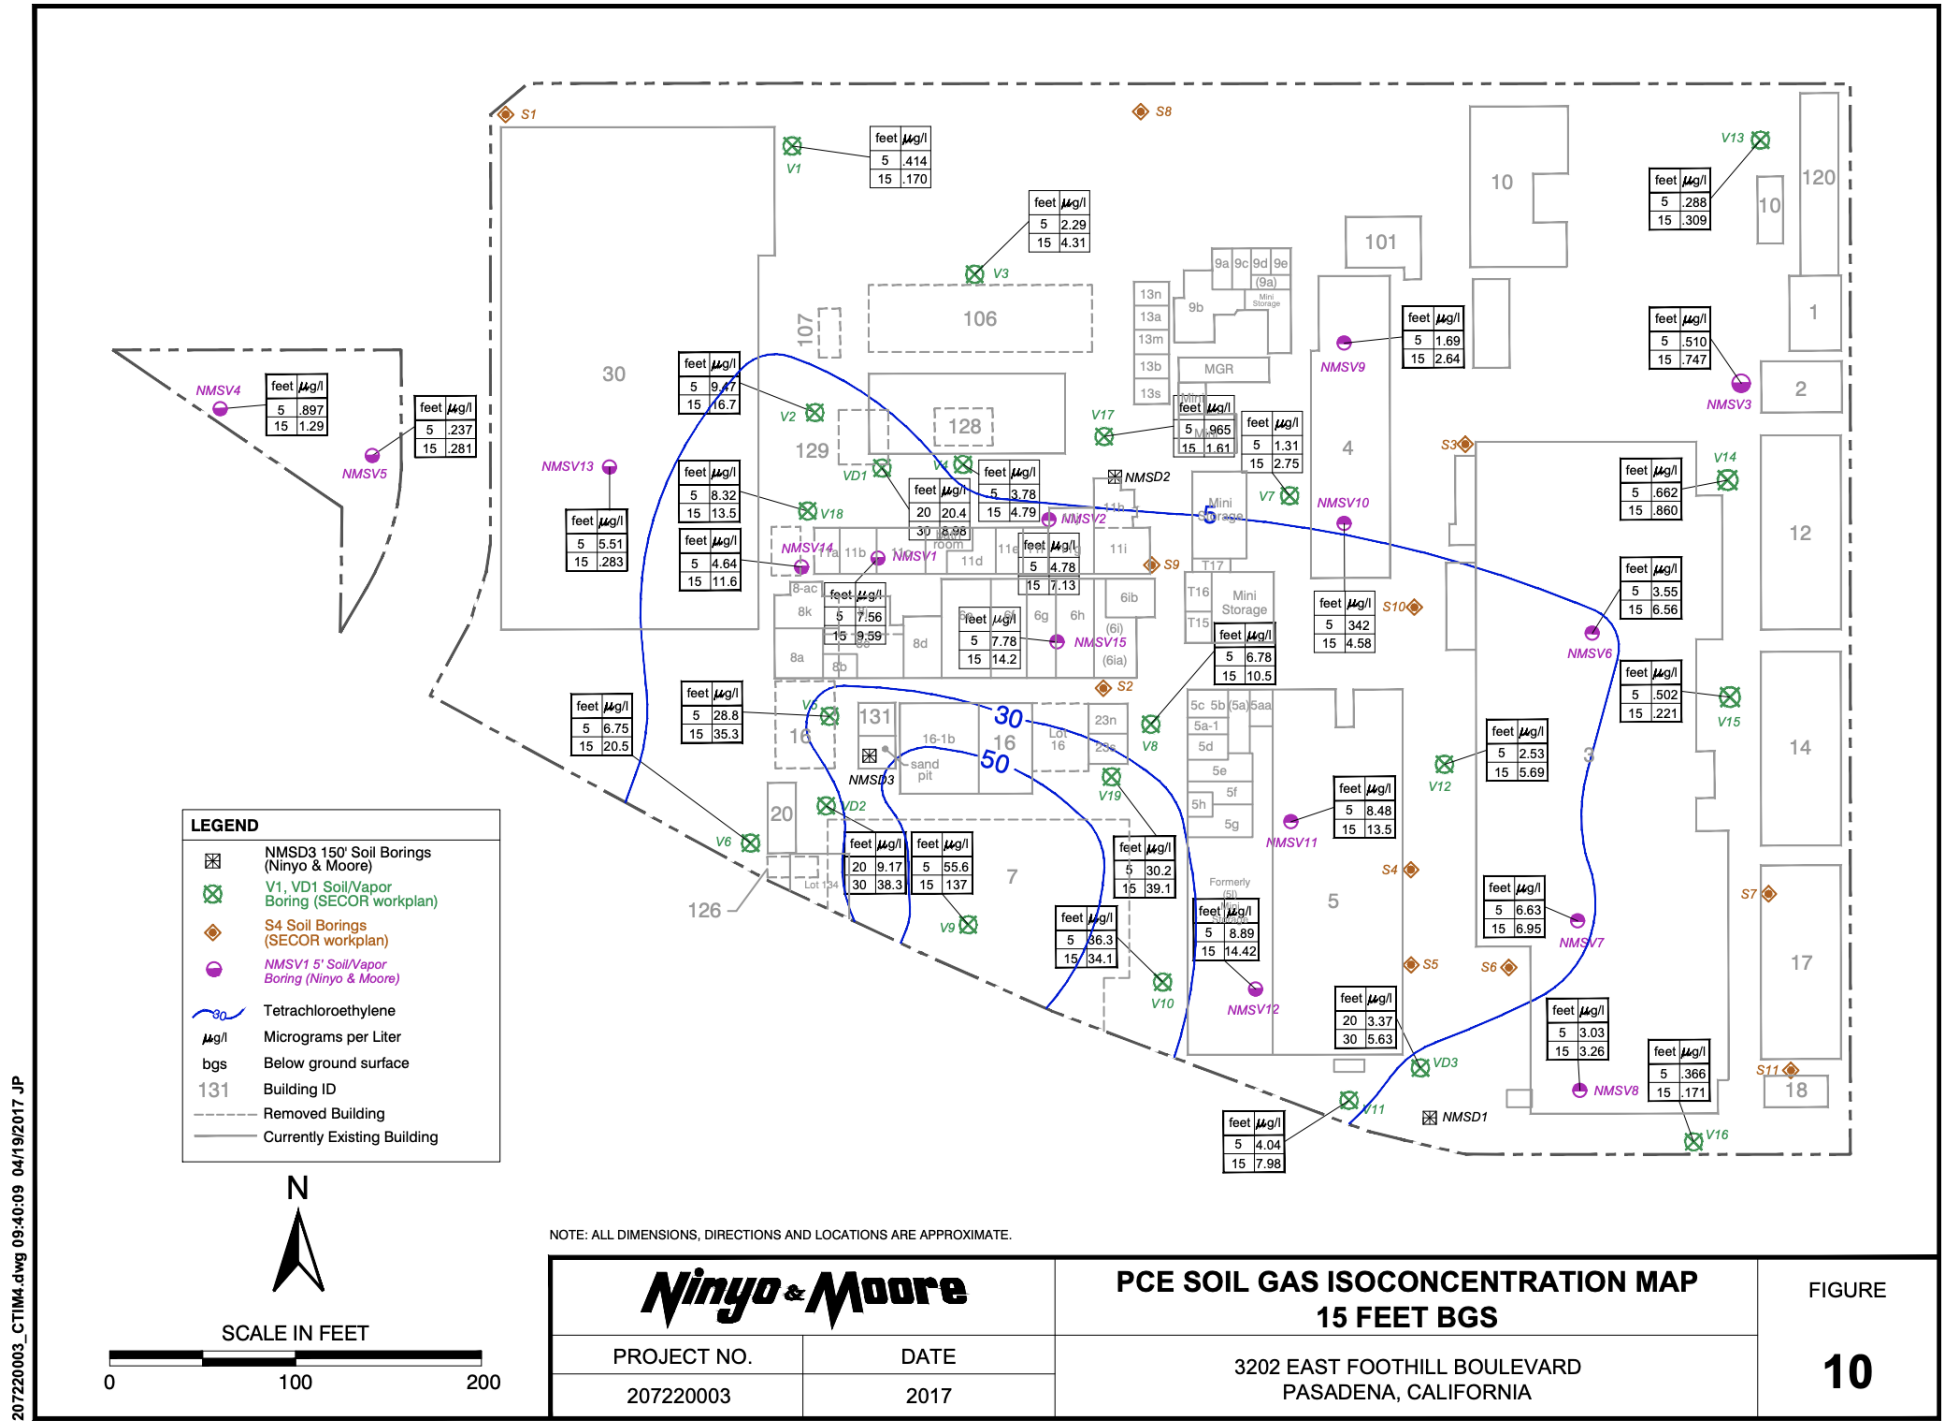

207220003\_CTTM4.dwg 09:40:09 04/19/2017 JP



Figure S6. CT Soil Gas Isoconcentration Map at Former Naval Ordnance Test Station, Pasadena, CA [6, 59], Figure 12.

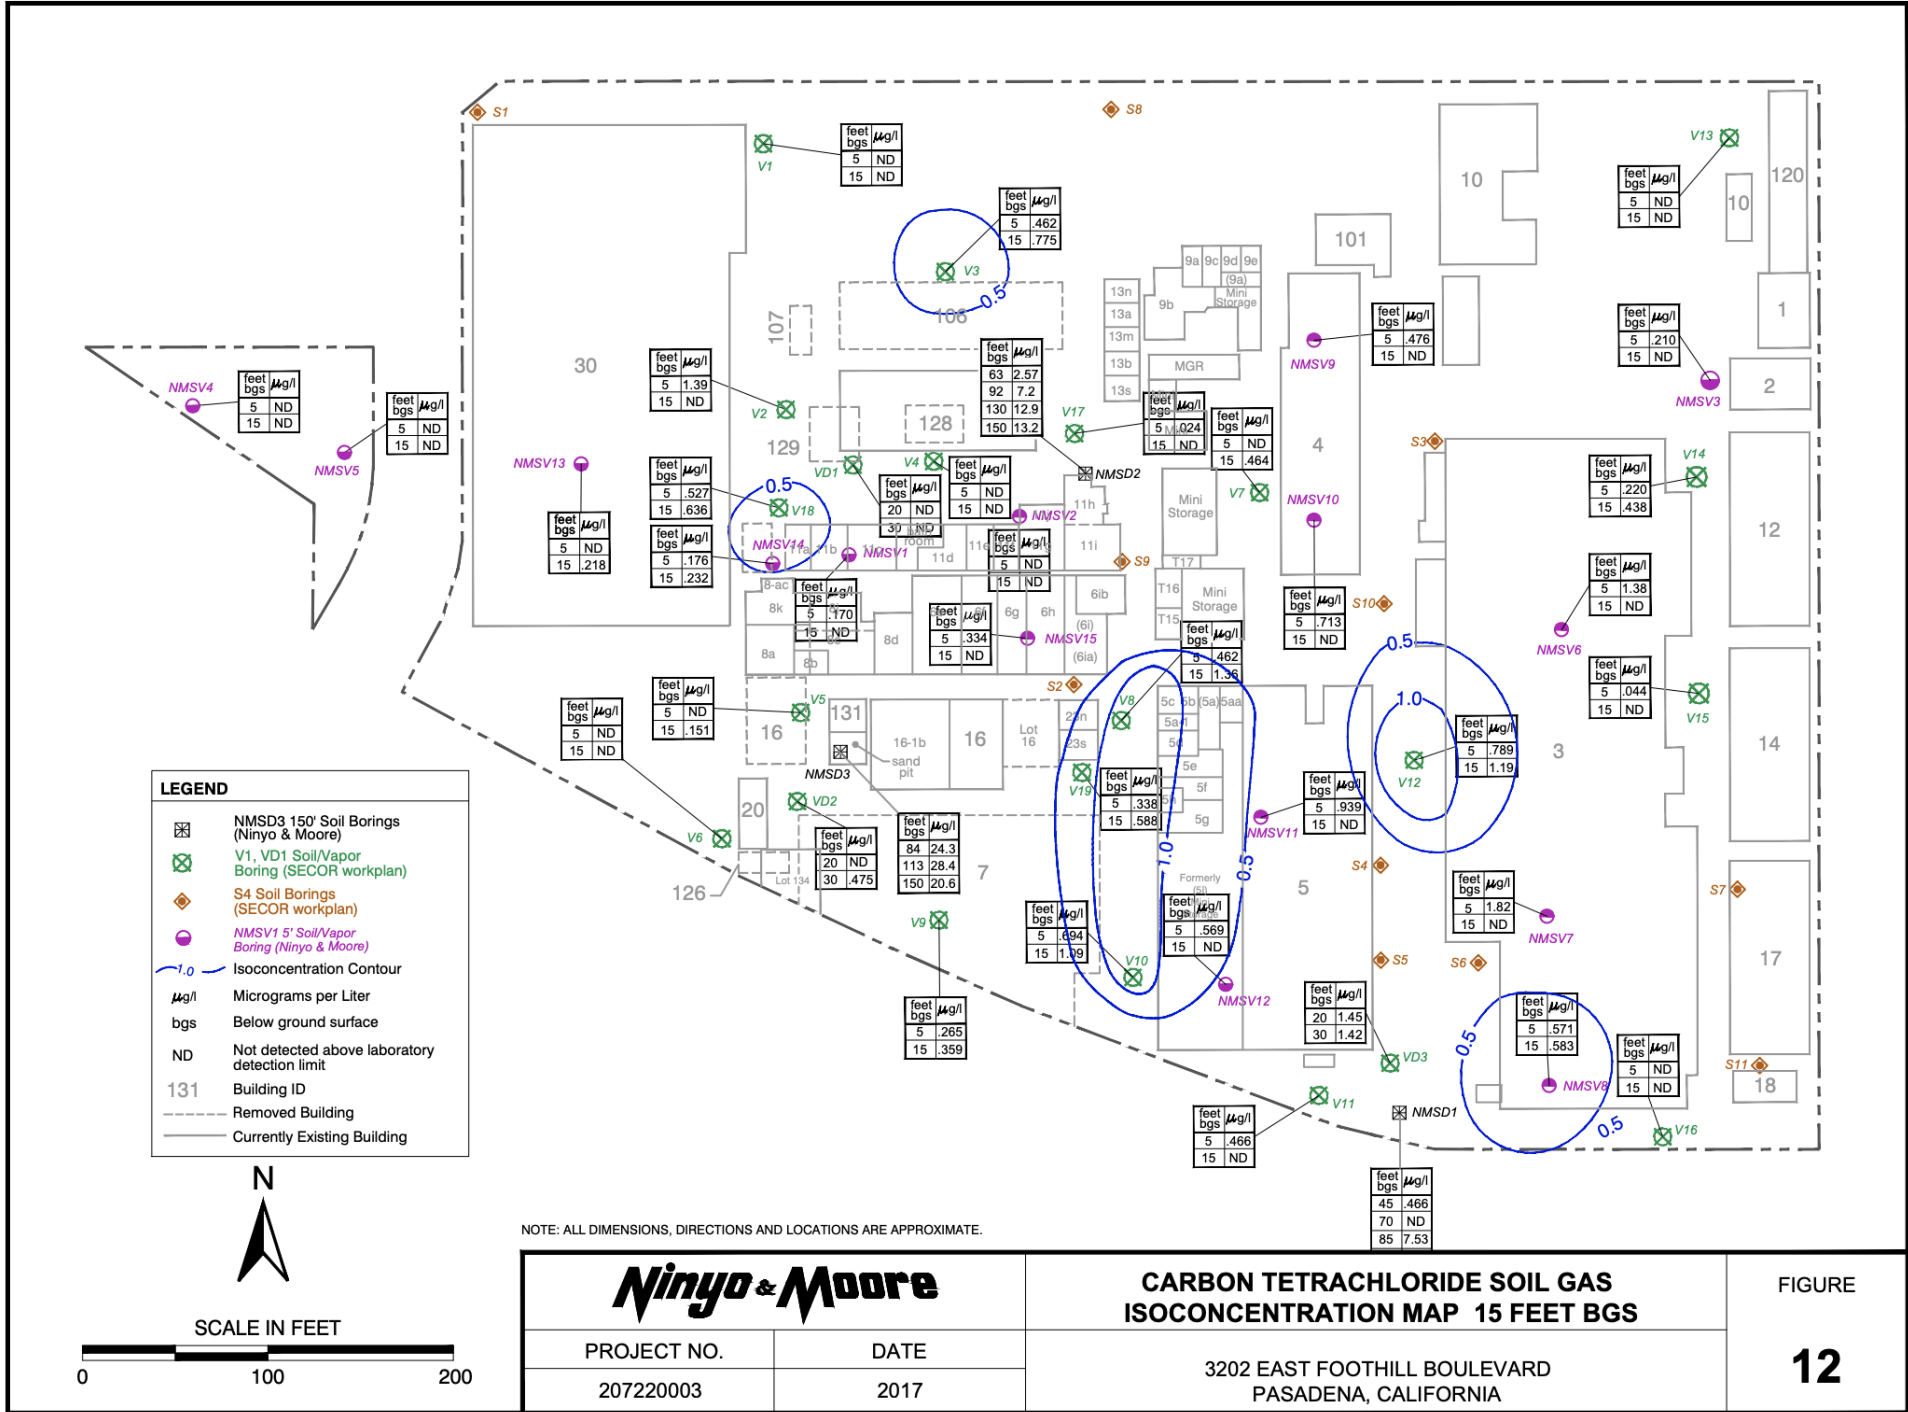

Figure S7. Site Location at Former Naval Ordnance Test Station, Pasadena, CA [59], Figure 1.

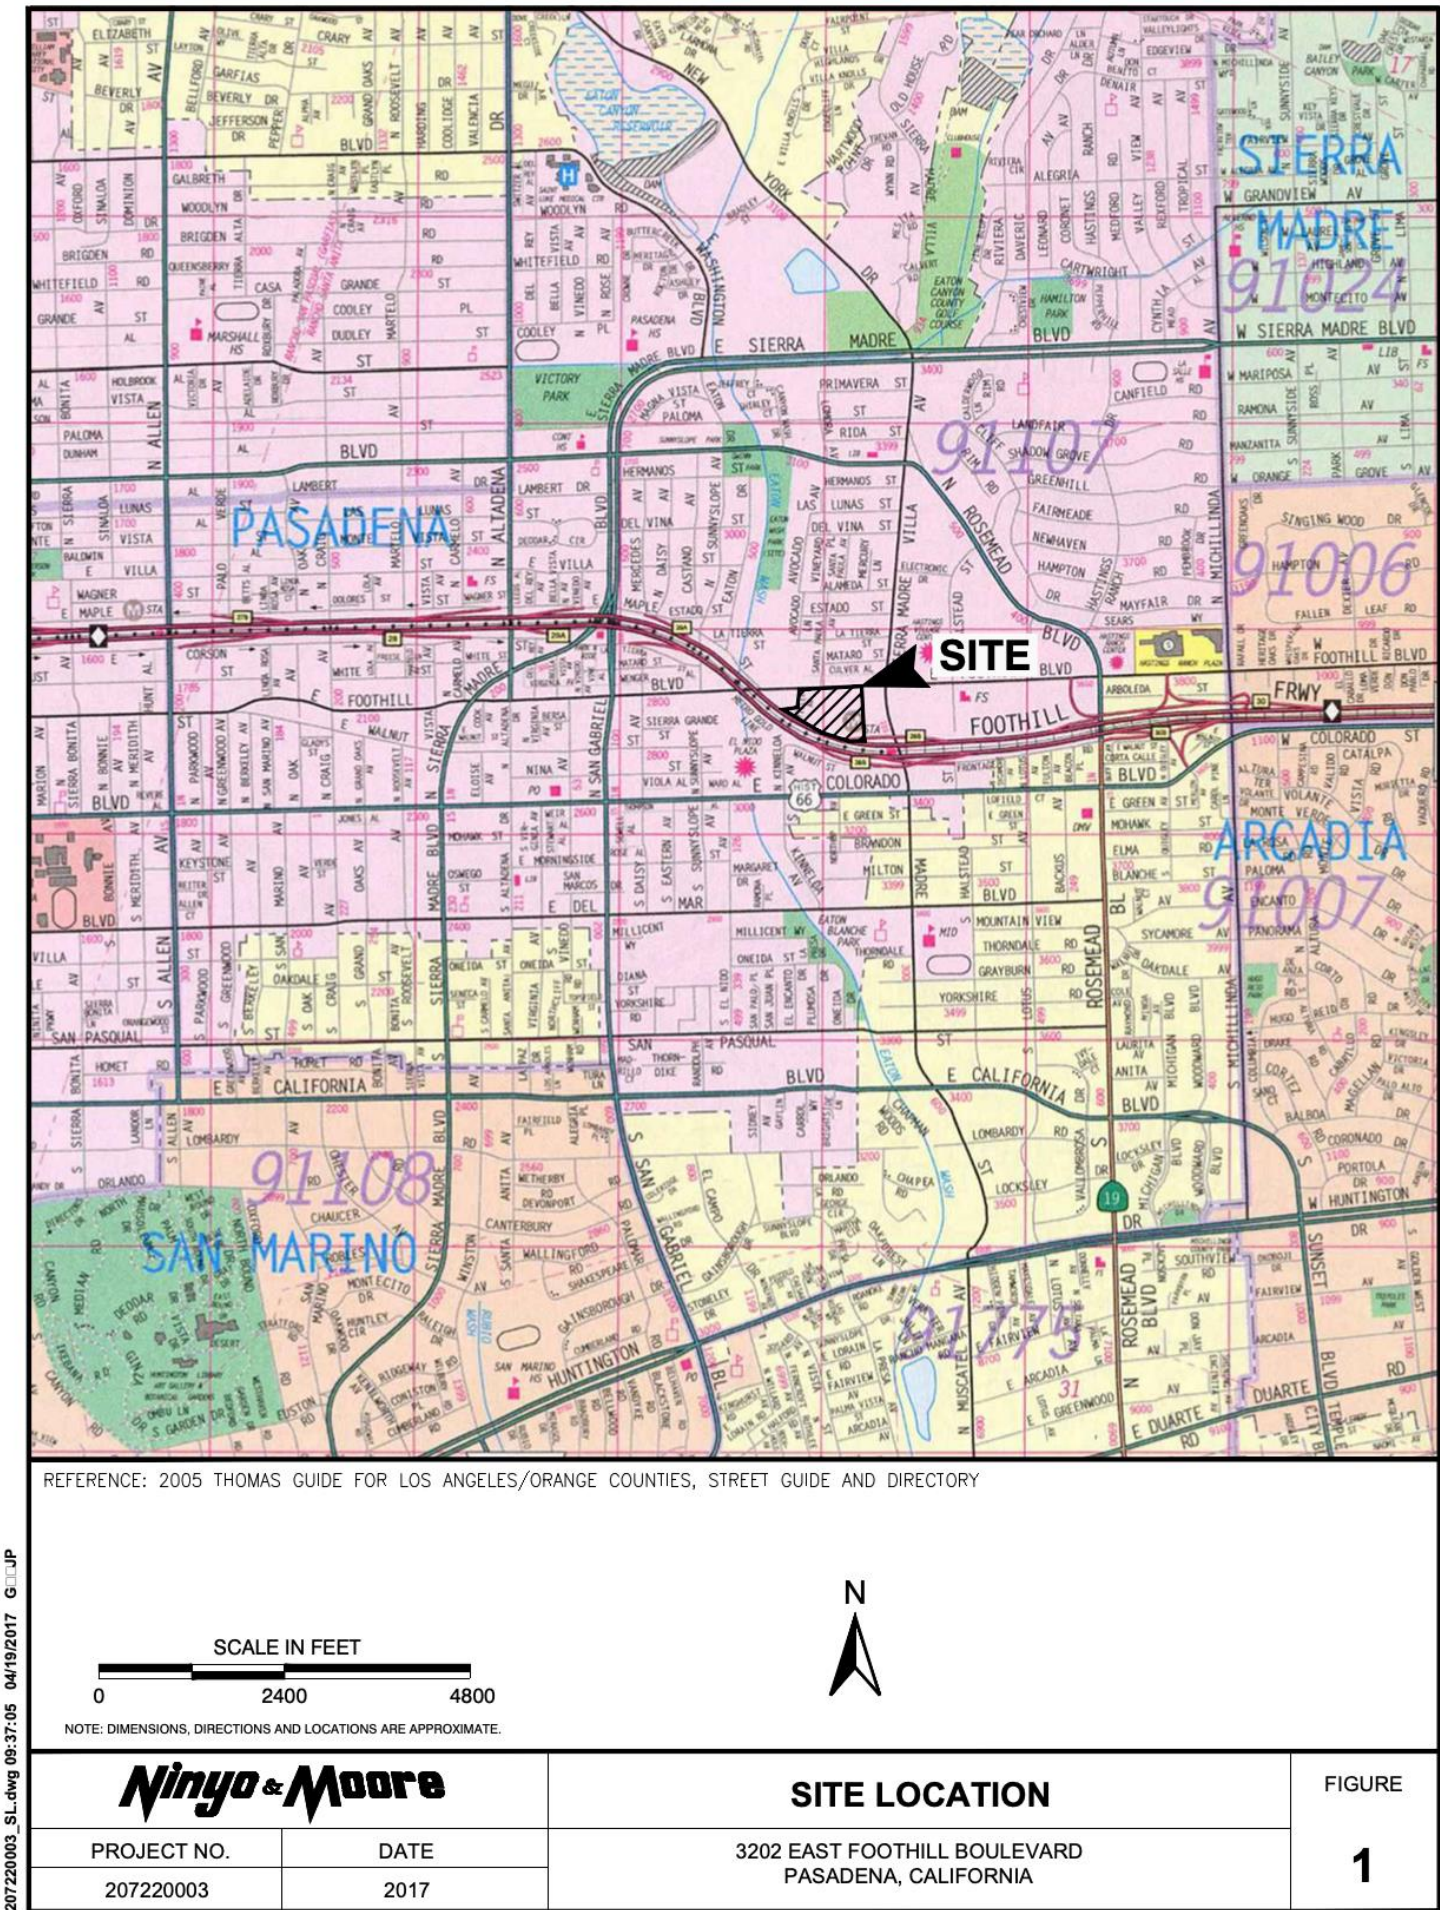

207220003\_SL.dwg 09:37:05 04/19/2017 G□□JP

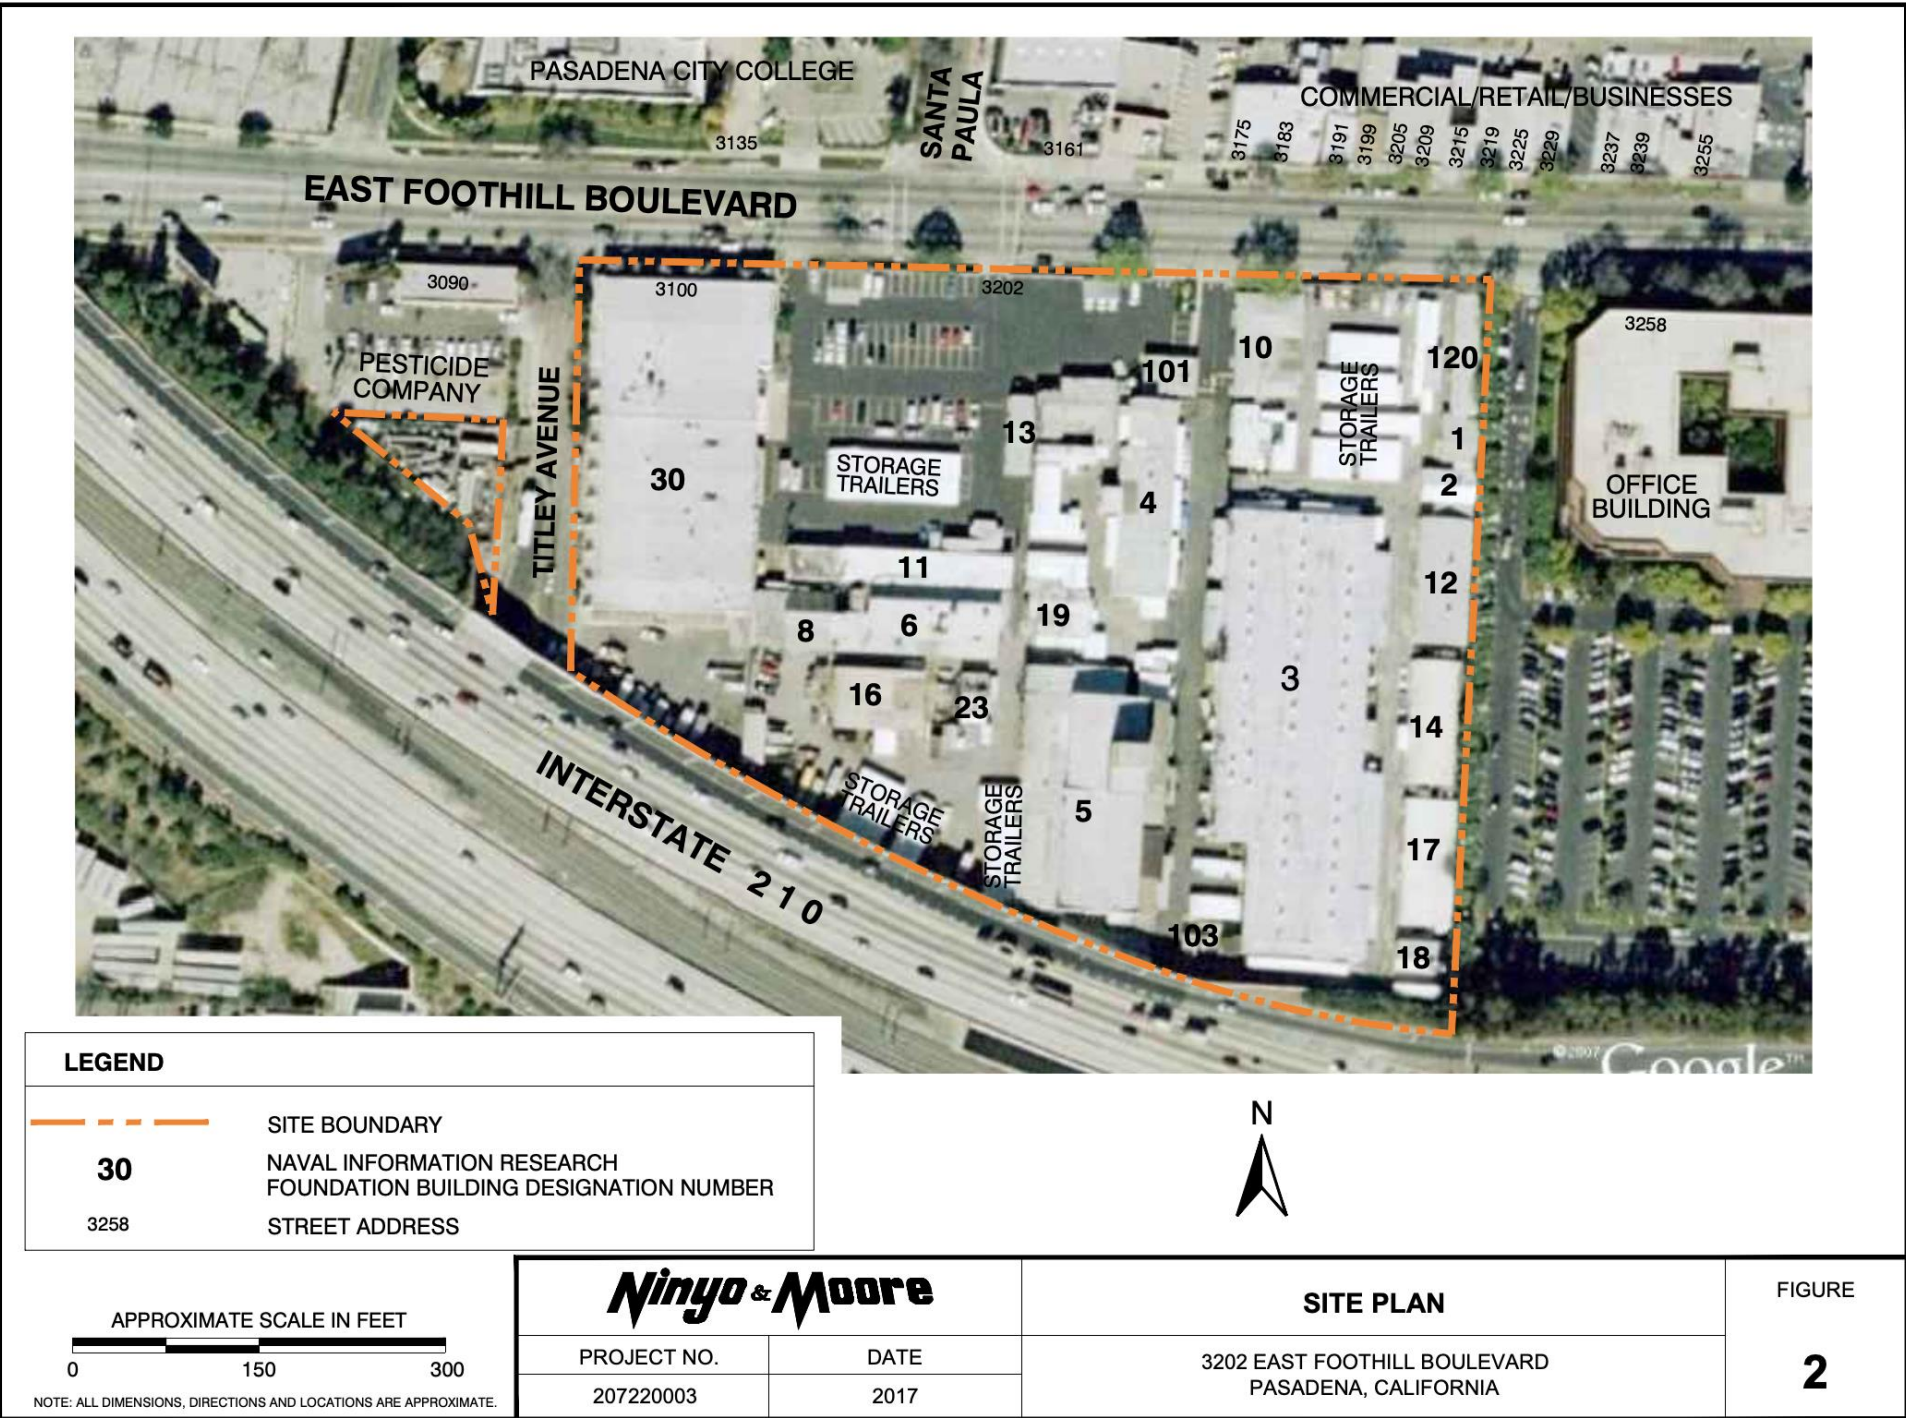

207220003\_SP.dwg 09:37:05 04/19/2017 GK, JP

Figure S9. Past Military and Current Site Use at Site at Former Naval Ordnance Test Station, Pasadena, CA [59], Figure 3.

10

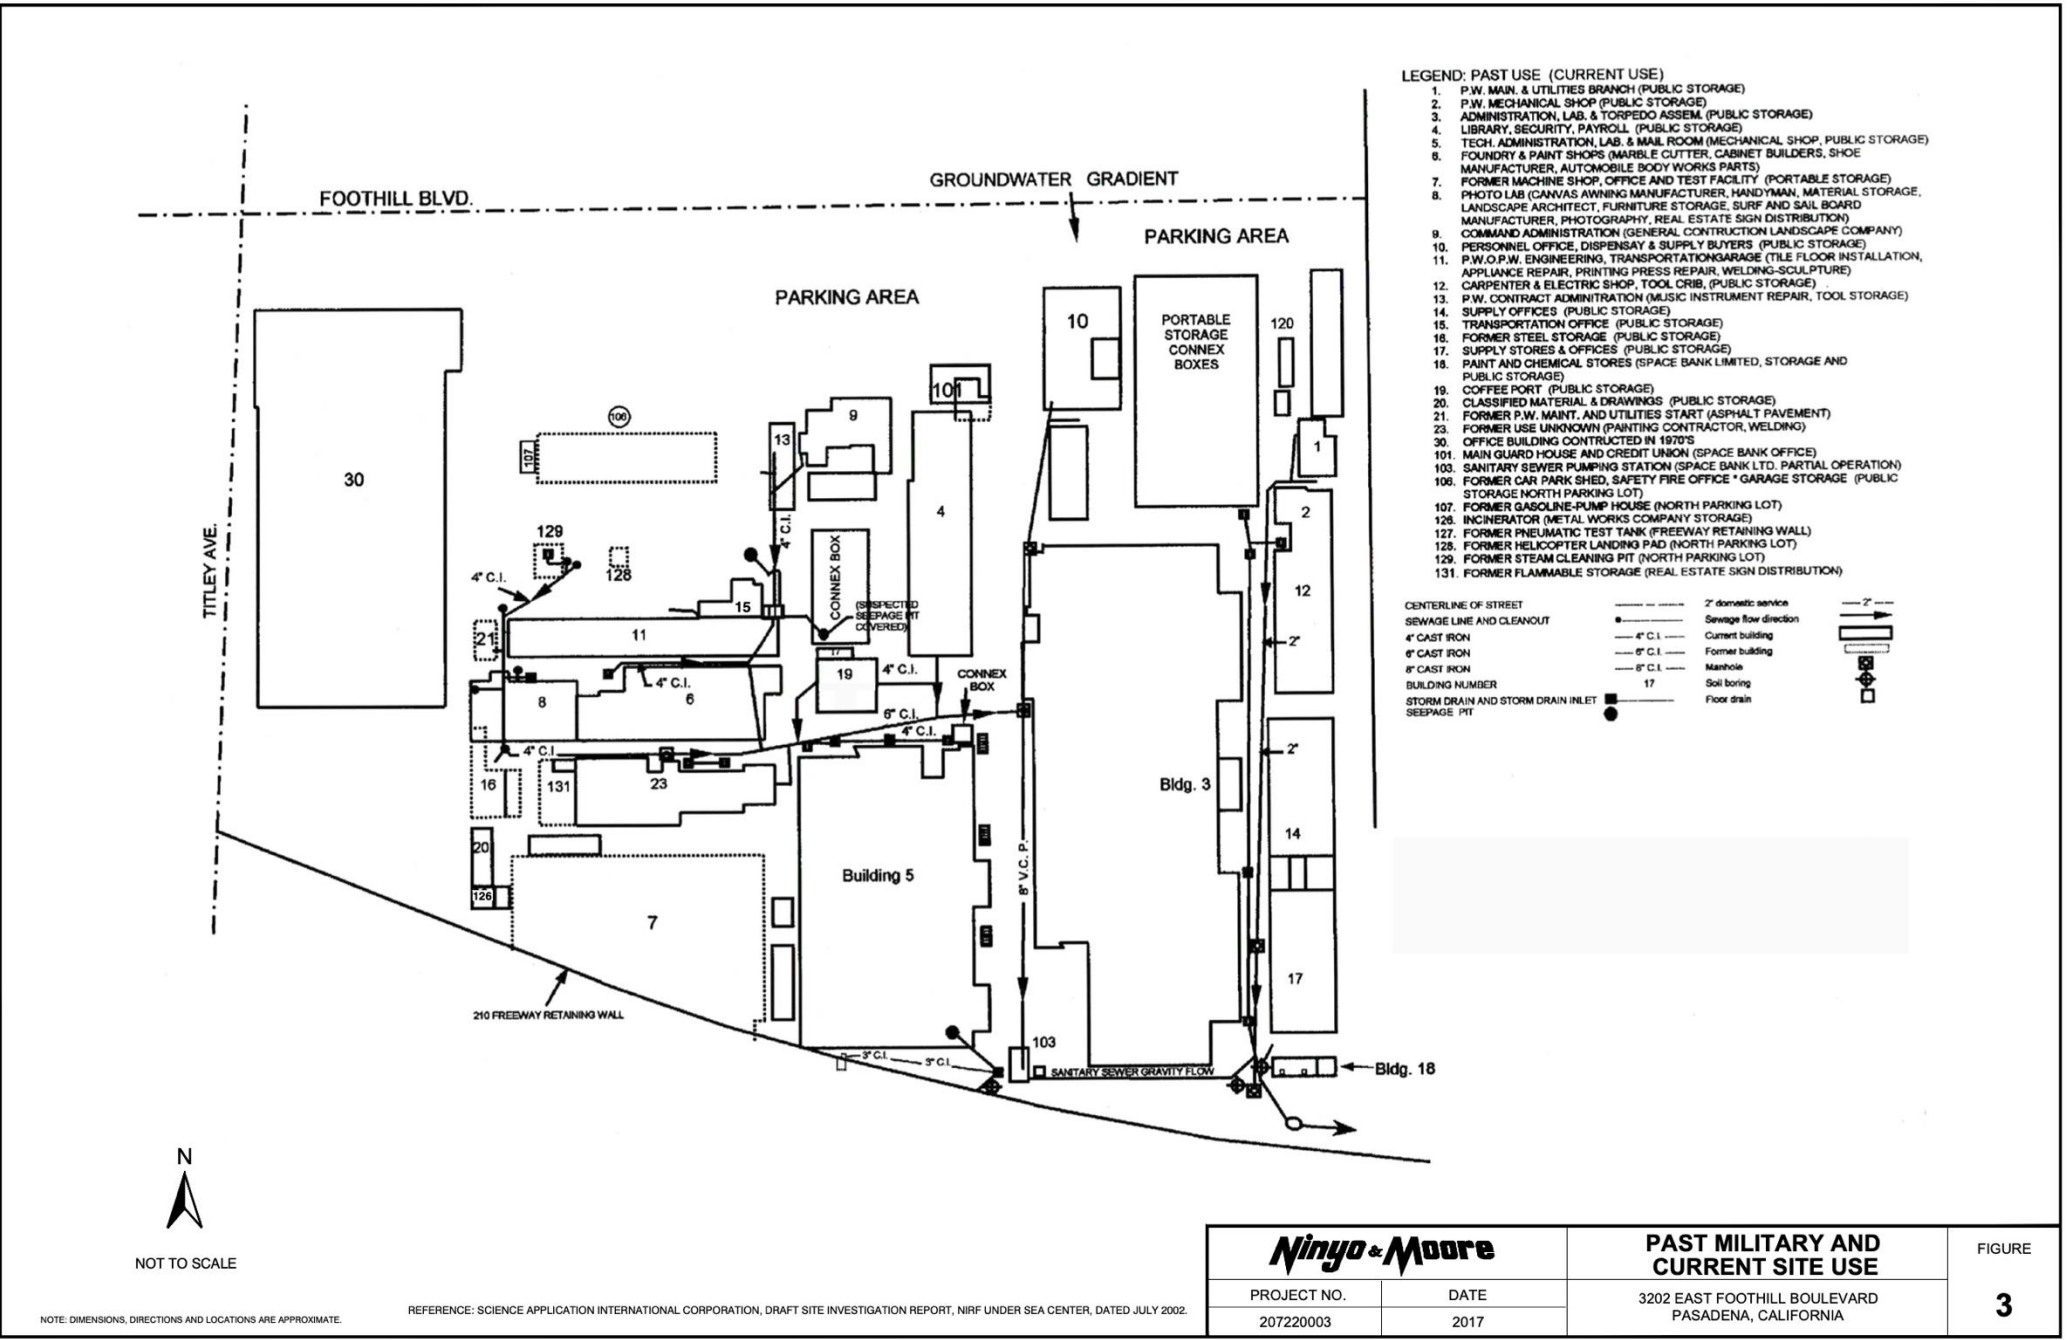

Supplement: Supplementary file 1 [file ijerph-19-07679-s001.zip › 6-2-22-ksf-Supplemental File S1a.pdf]
