# Supplementary material for: Does Hazardous-Waste Testing Follow Technical Guidance, Thus Help Protect Environmental Justice and Health?
Source: Int J Environ Res Public Health. 2022 Jun 23;19(13):7679. doi: 10.3390/ijerph19137679 (PMC9265884; doi:10.3390/ijerph19137679)

Contents of Supplemental File S1b

|                 | Pages |
|-----------------|-------|
| Figure S10..... | 11    |
| Figure S11..... | 12    |
| Figure S12..... | 13    |
| Figure S13..... | 14    |
| Figure S14..... | 15    |
| Figure S15..... | 16    |
| Figure S16..... | 17    |
| Figure S17..... | 18    |
| Figure S18..... | 19    |

**Figure S10.** Storm Water Seepage Pit Diagram at Former Naval Ordnance Test Station, Pasadena, CA [59], Figure 5.

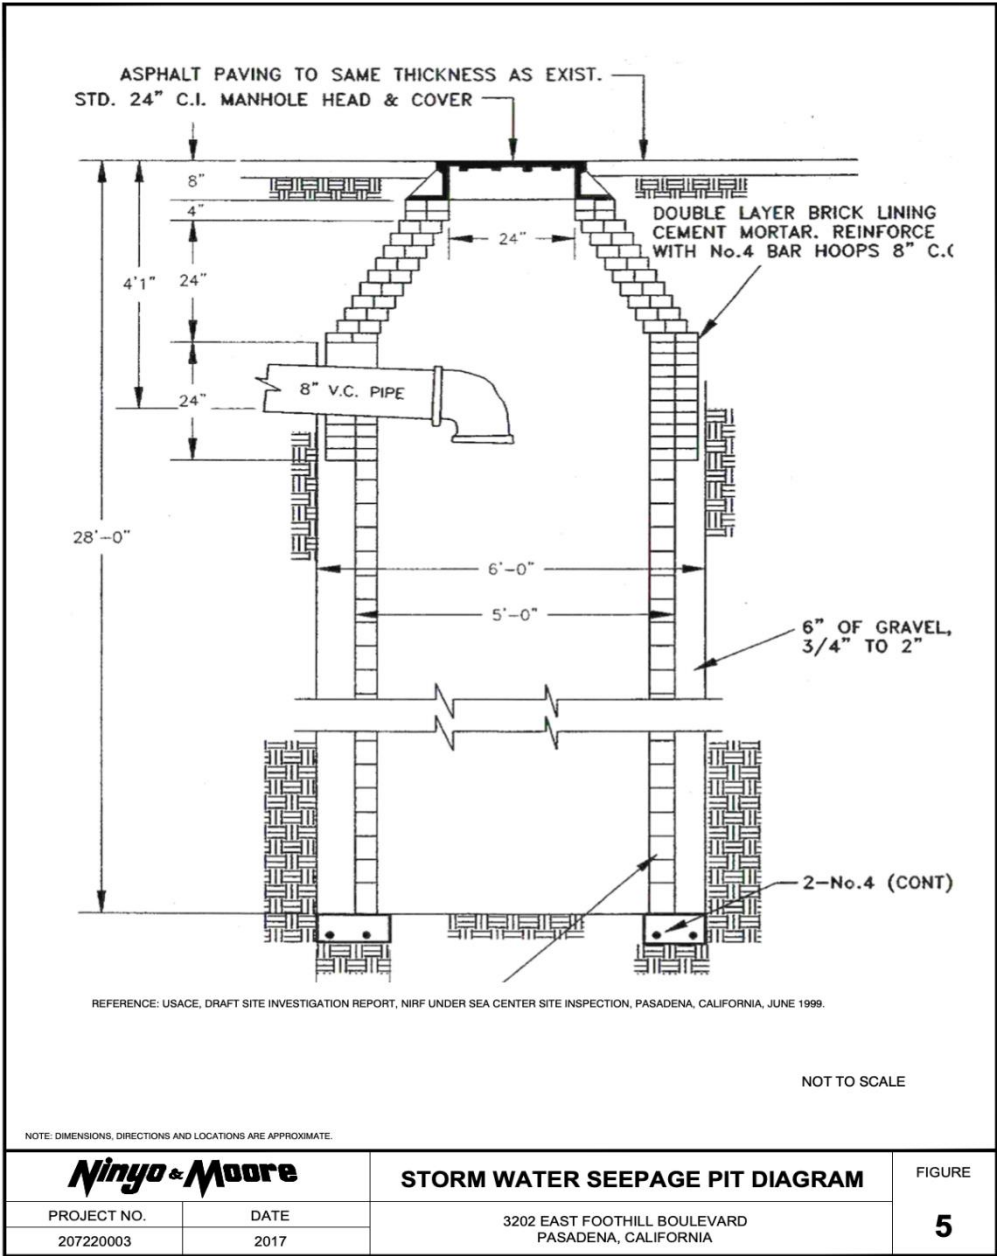

Figure S11. TPH and PAHS Sampling Locations at Former Naval Ordnance Test Station, Pasadena, CA [59], Figure 6.

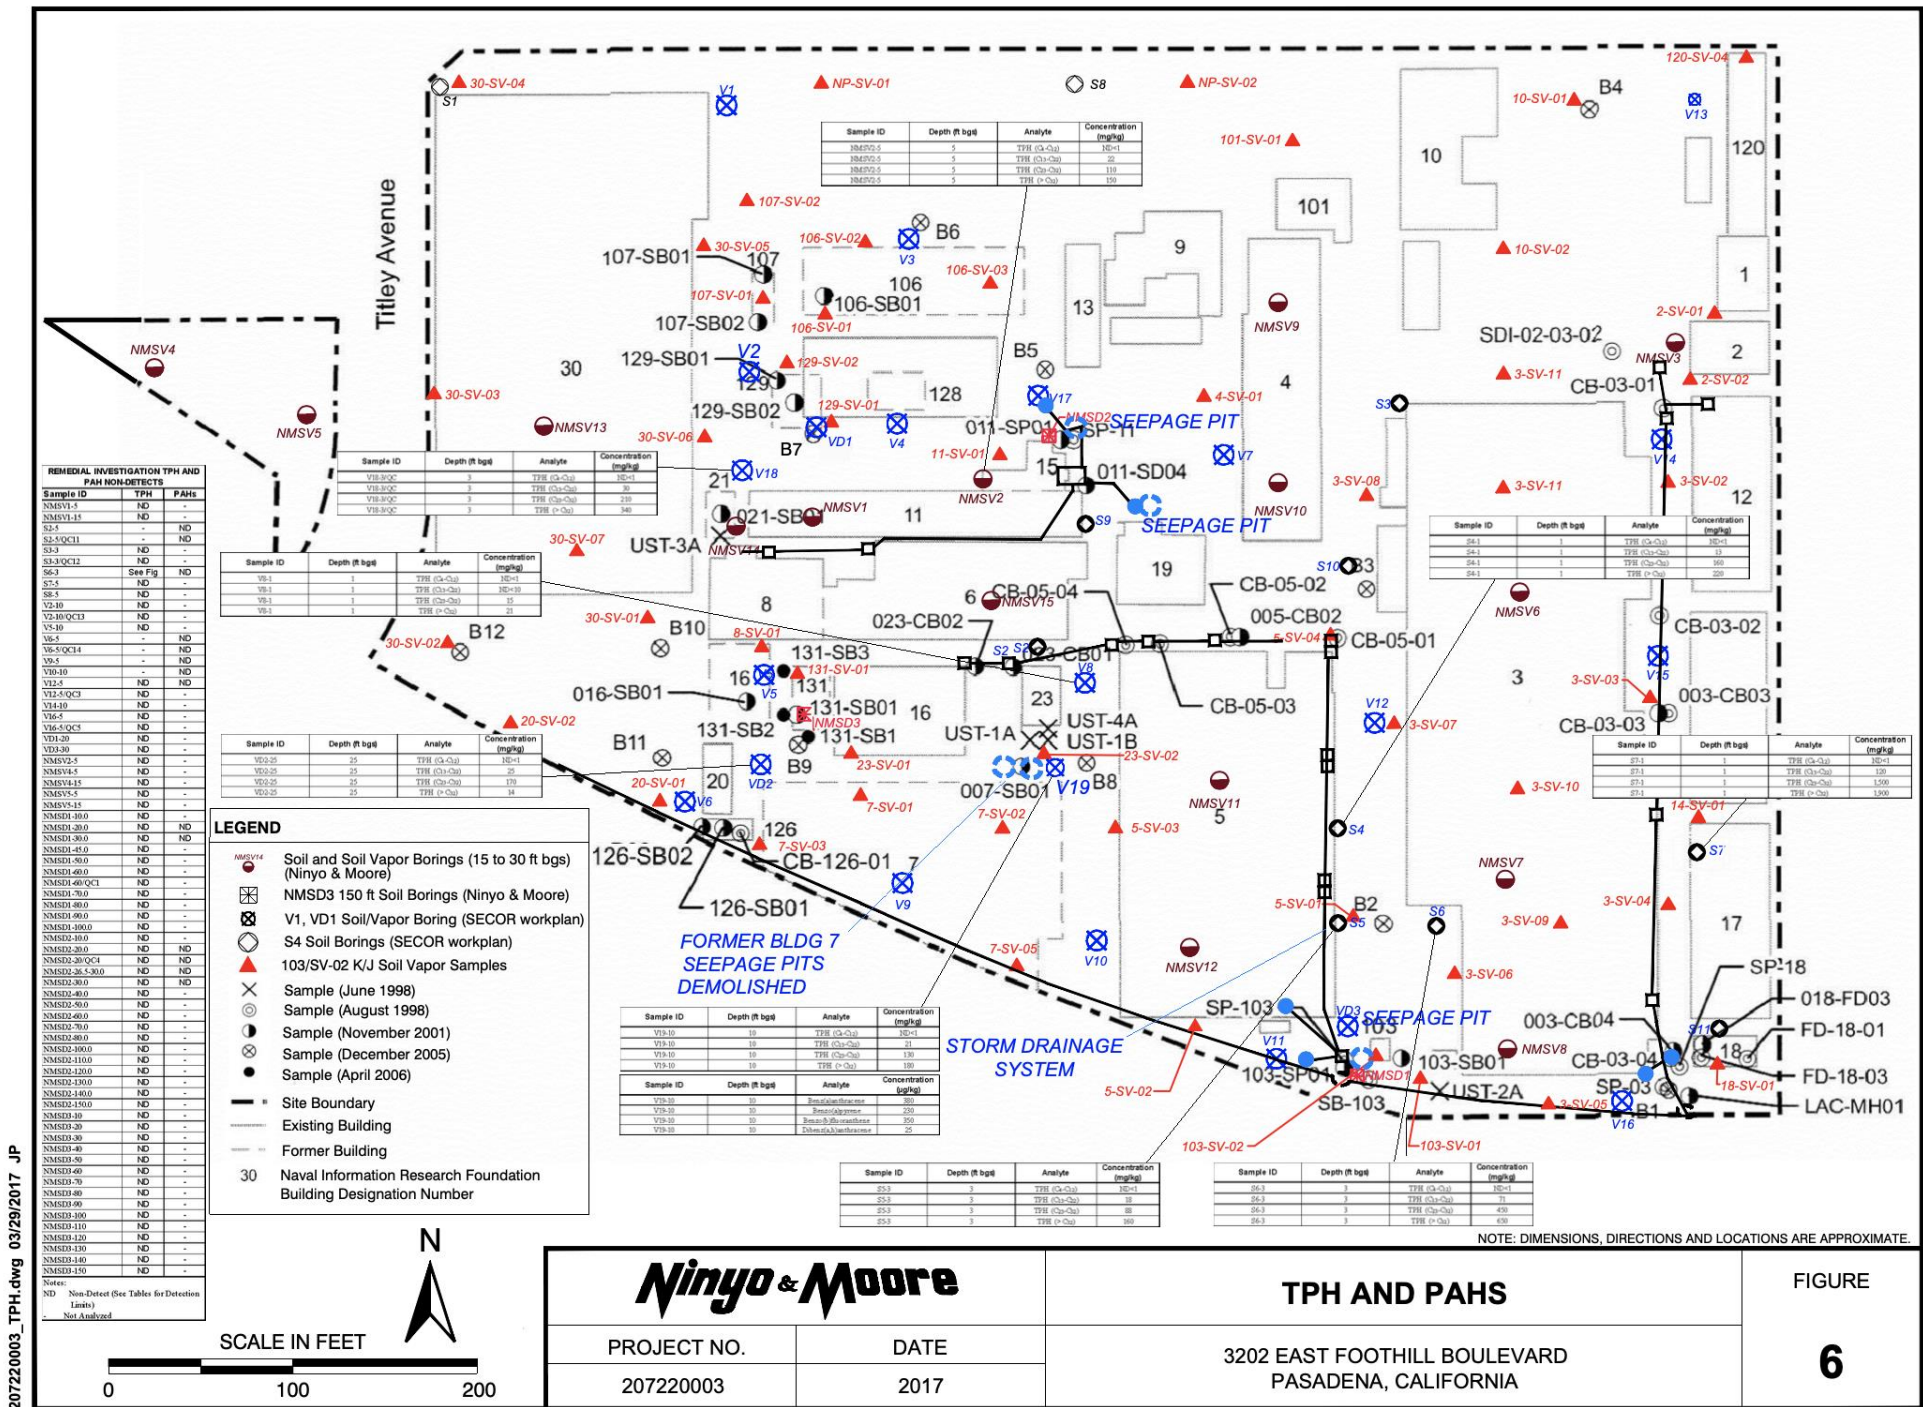

Figure S12. Hexavalent Chromium Concentrations in Soil at Former Naval Ordnance Test Station, Pasadena, CA [59], Figure 8.

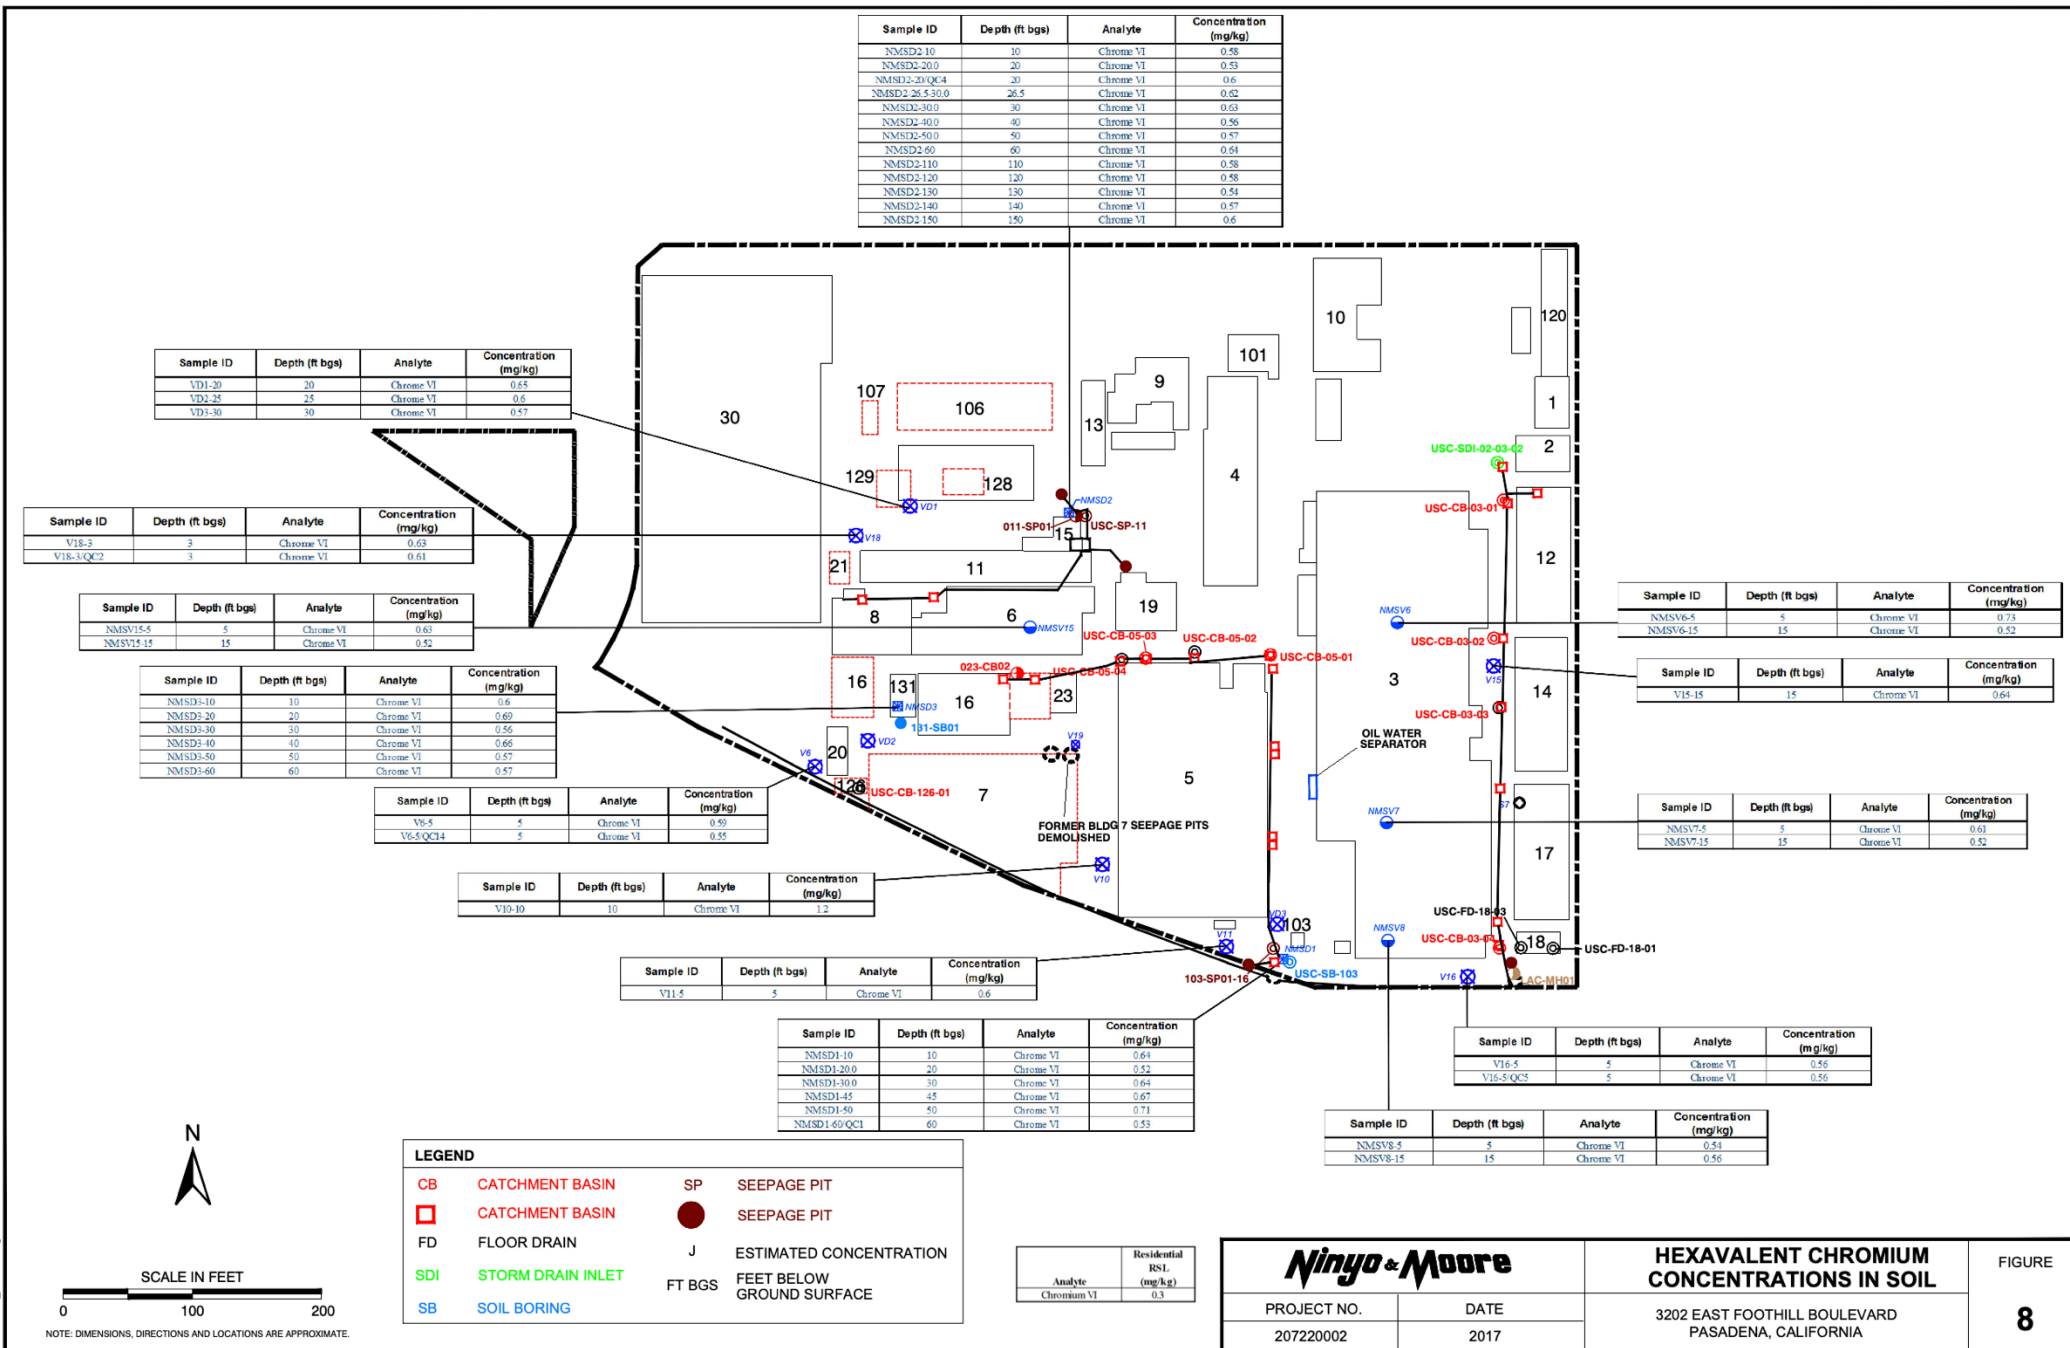

Figure S13. Boring Locations at Former Industrial Site, Monrovia, CA [83], Figure 3.

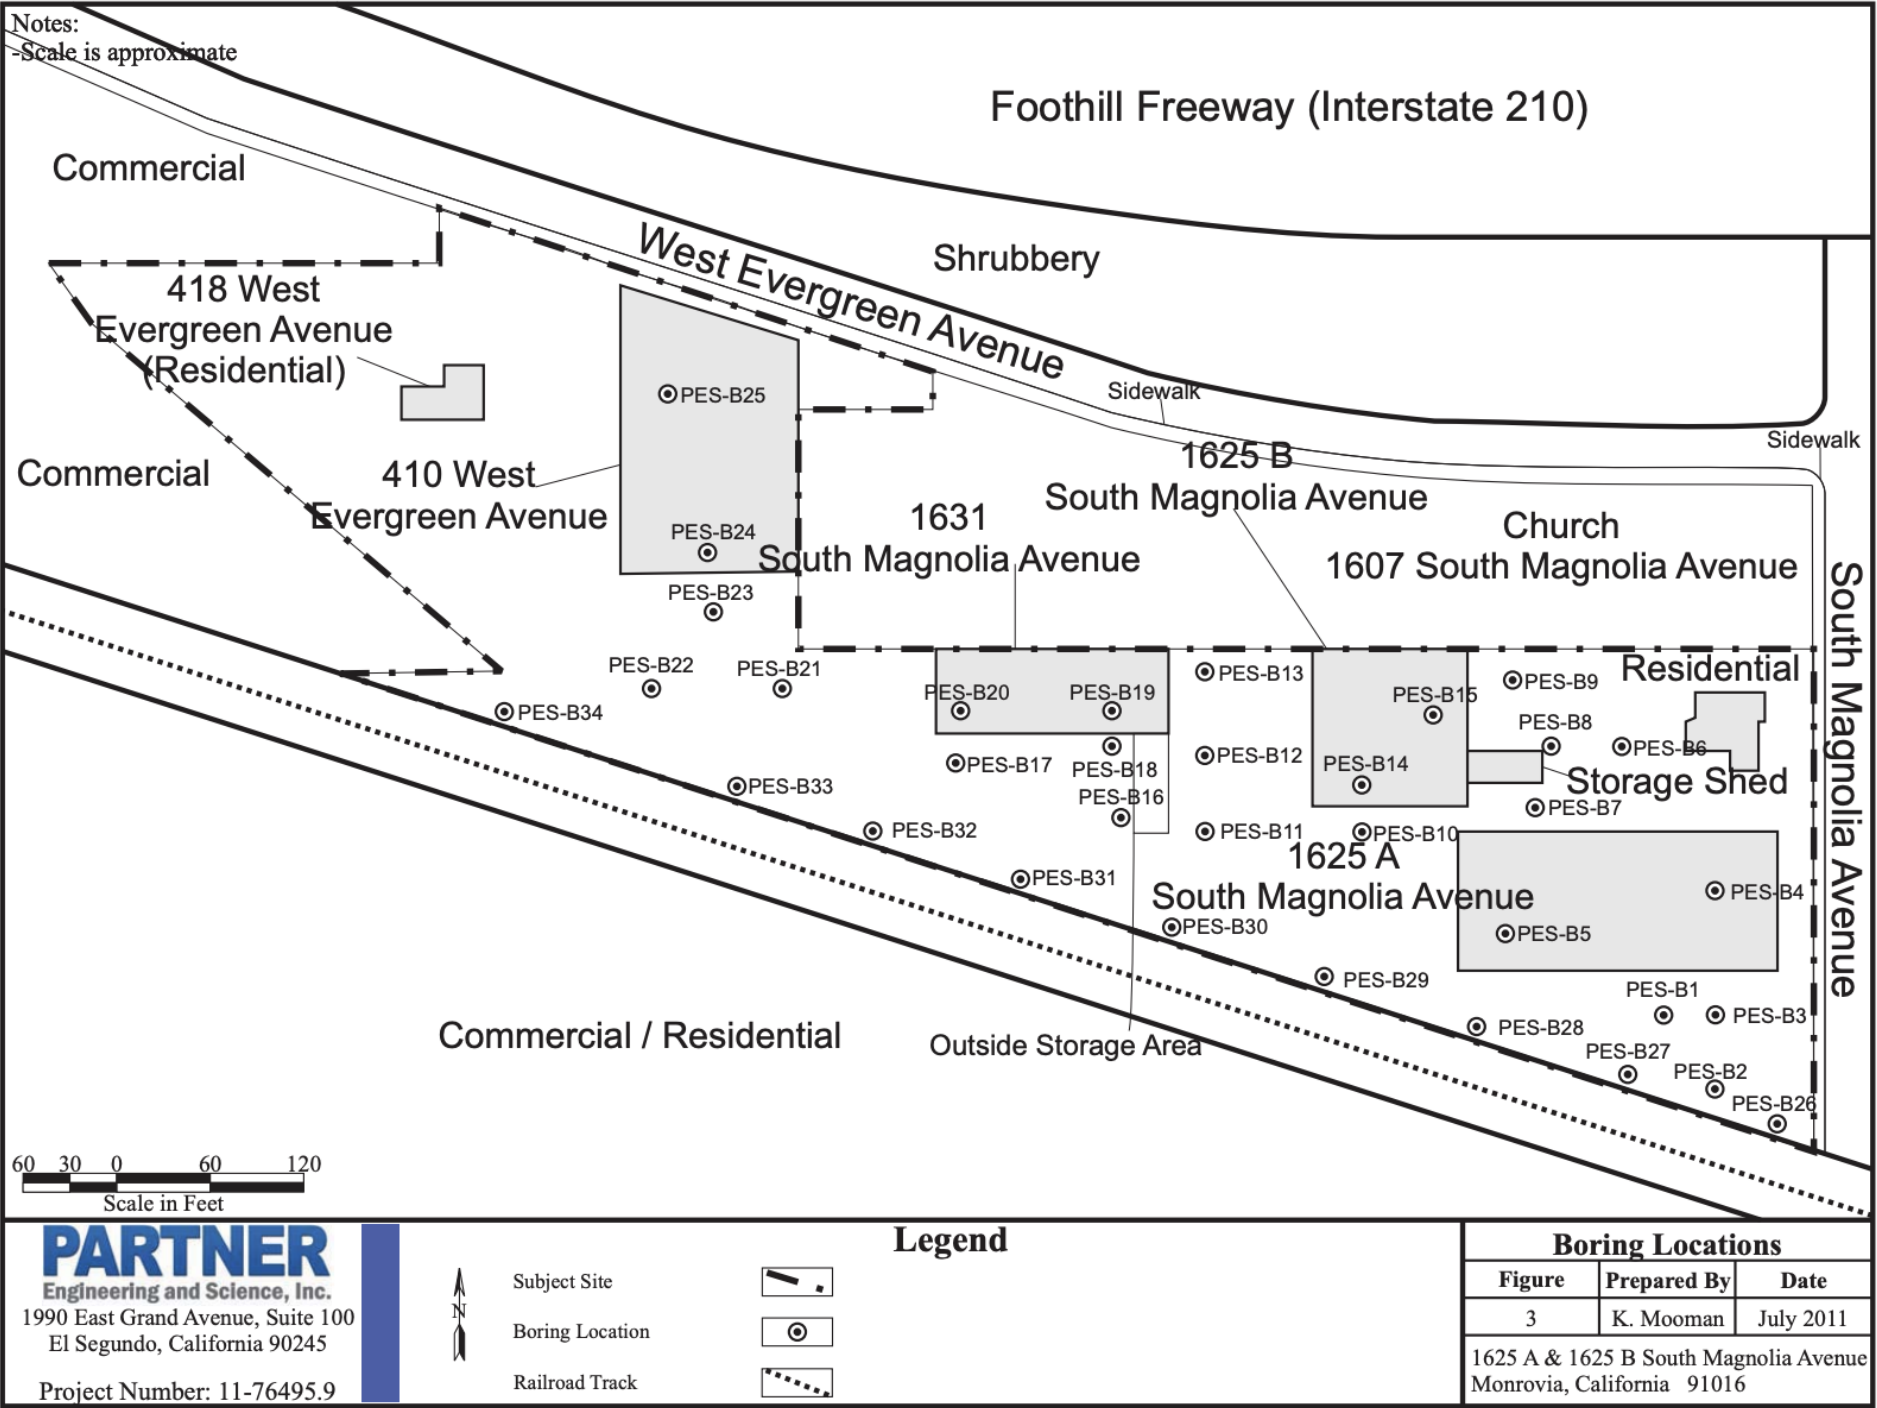

Figure S14. Soil Vapor Extraction System, Soil Vapor Extraction Well and Semi-Permanent Soil Vapor Probe Layout at Former Santa Fe Railyard, Boyle Heights, CA [79], Figure 7.

15

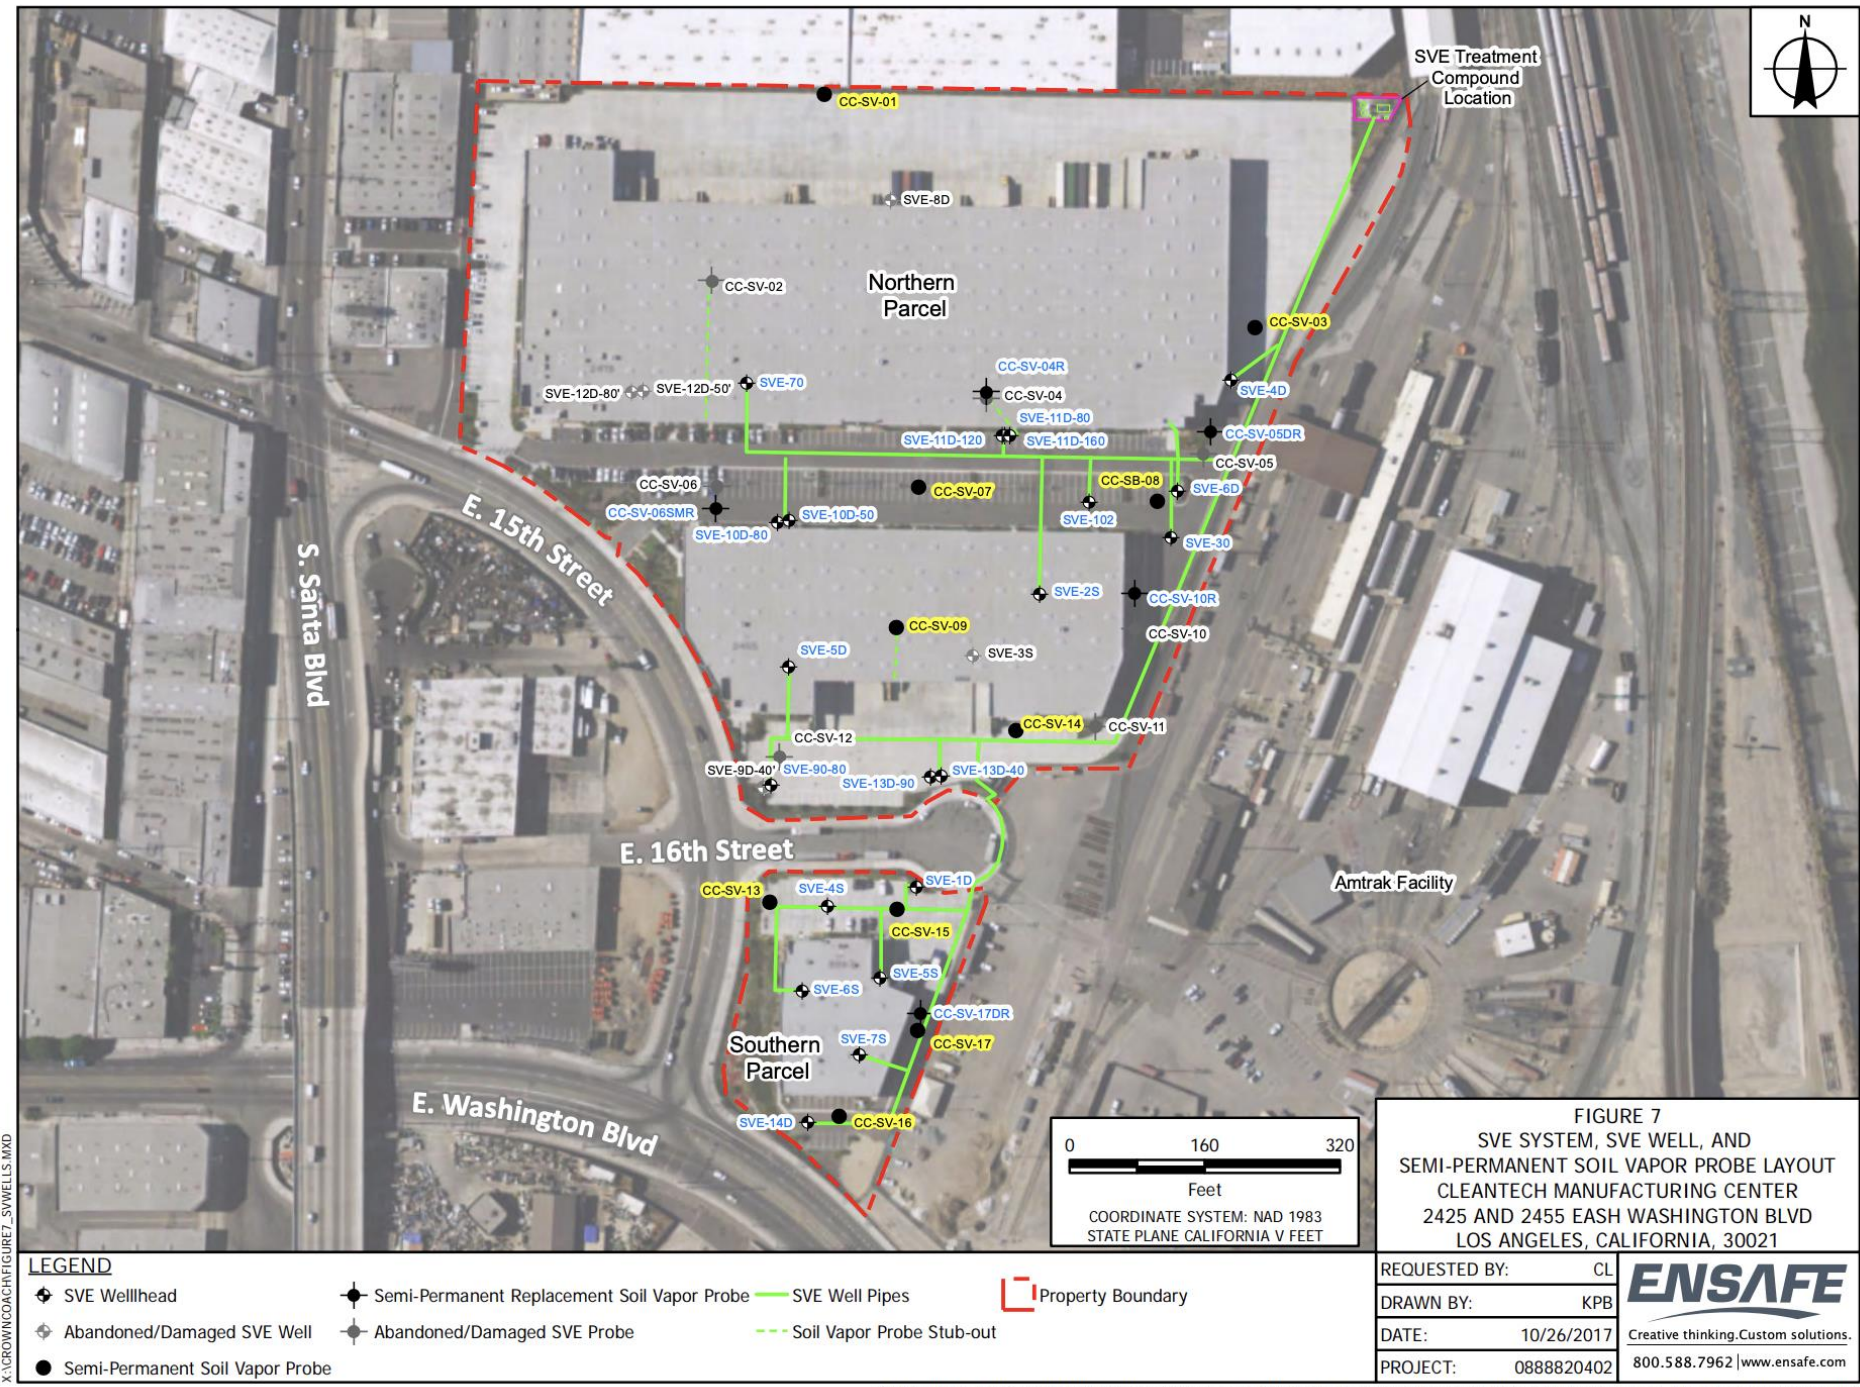

**Figure S15.** Soil Gas Analytical Results for Freon 11 at Former Raytheon/Atomics International Nuclear Weapons Site, Canoga Park, CA [72], 16  
Figure 4.

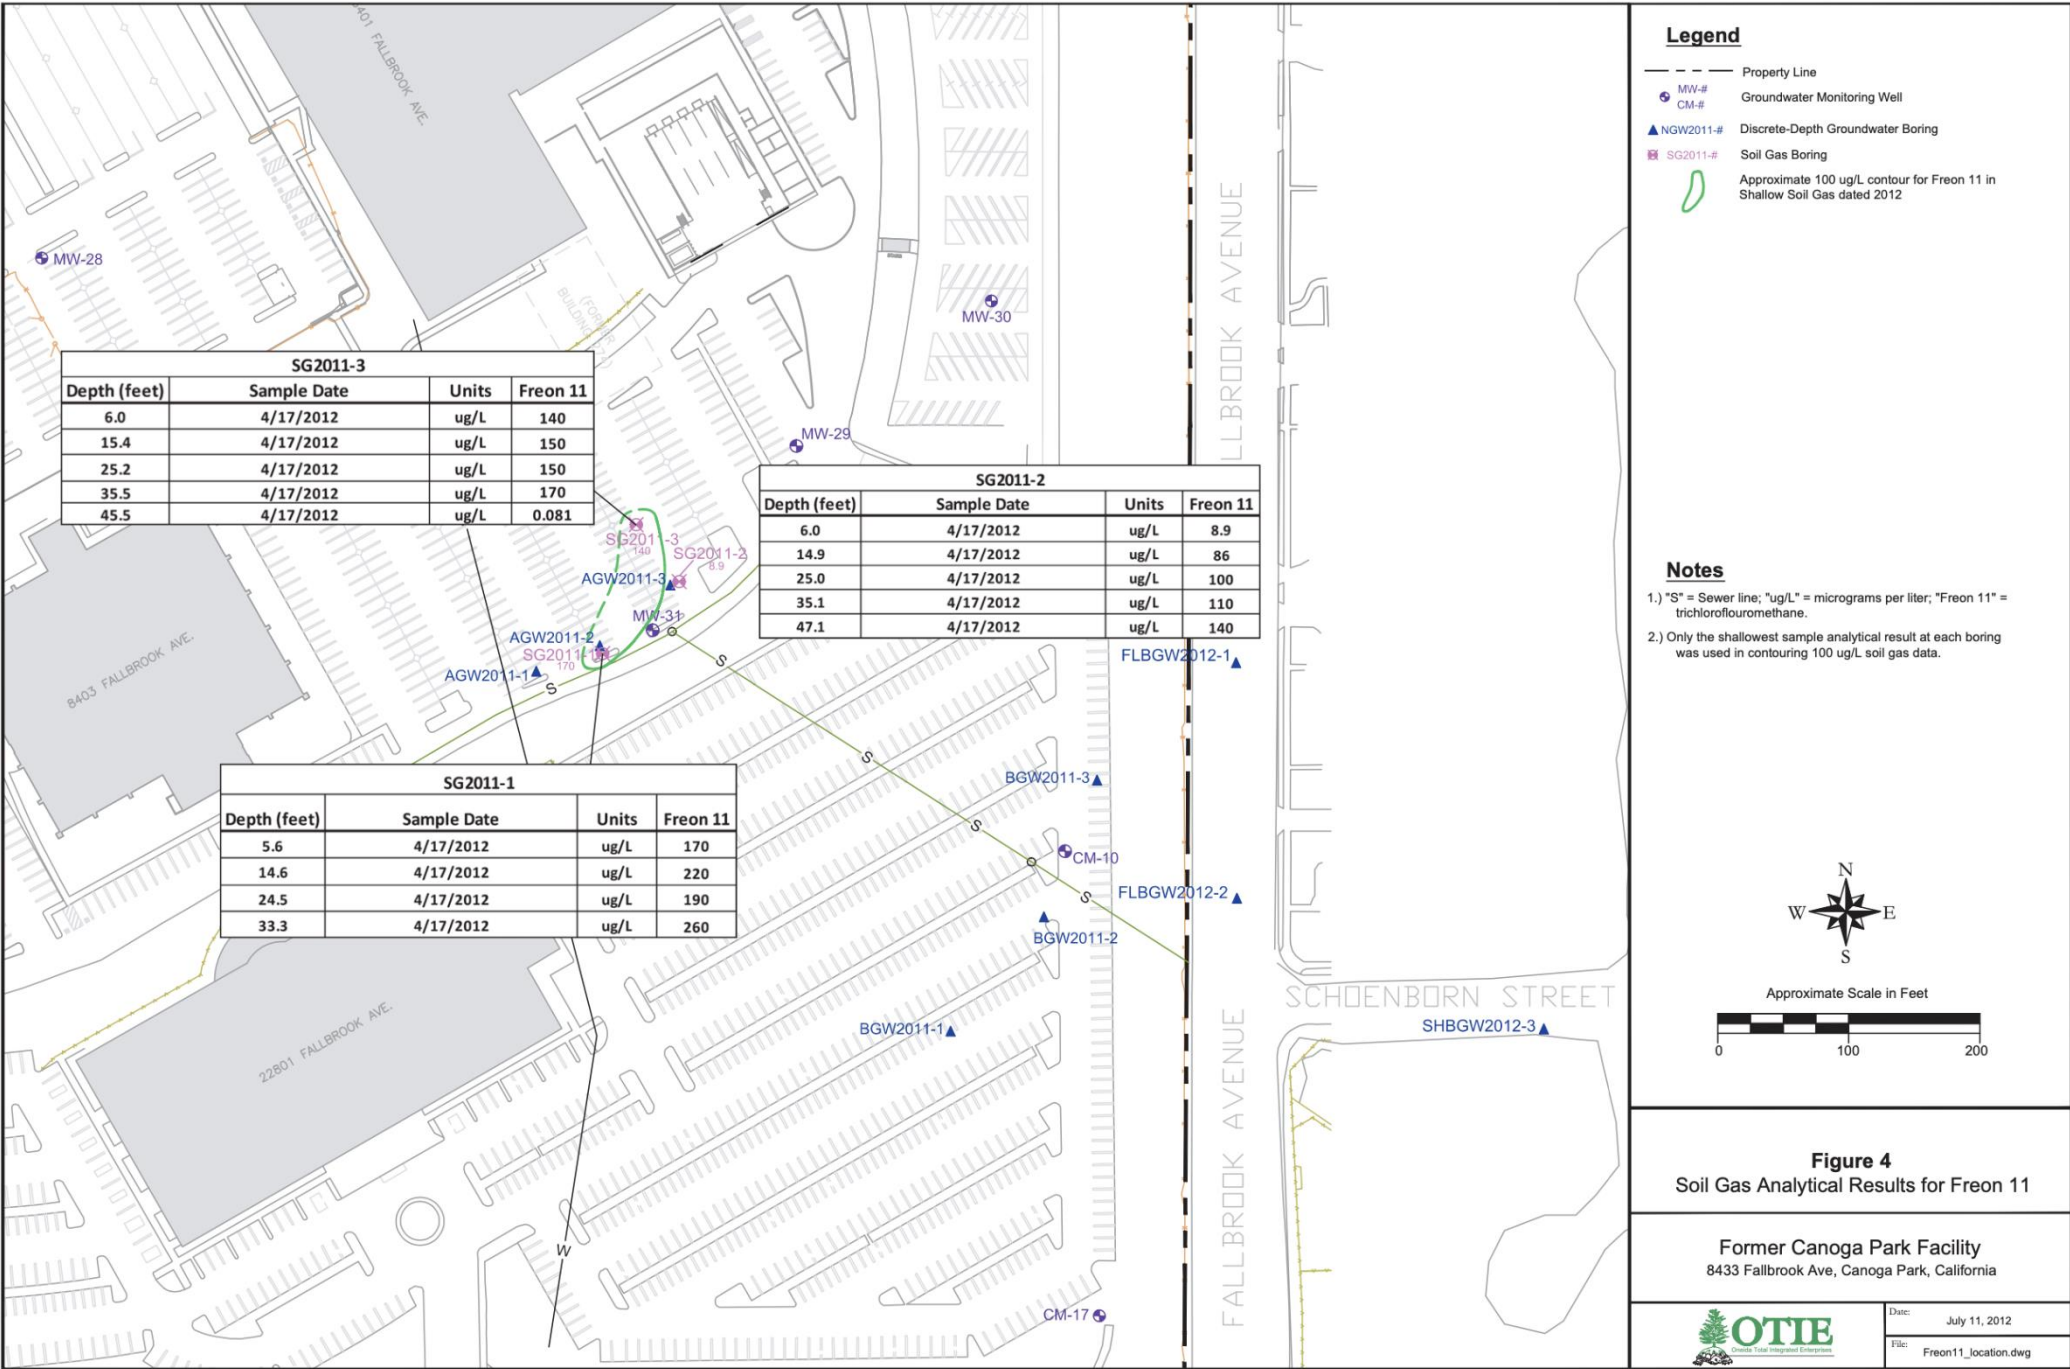

Figure S16. Sampling Locations at Former Raytheon/Atomics International Nuclear Weapons Site, Canoga Park, CA [72], Figure 3.

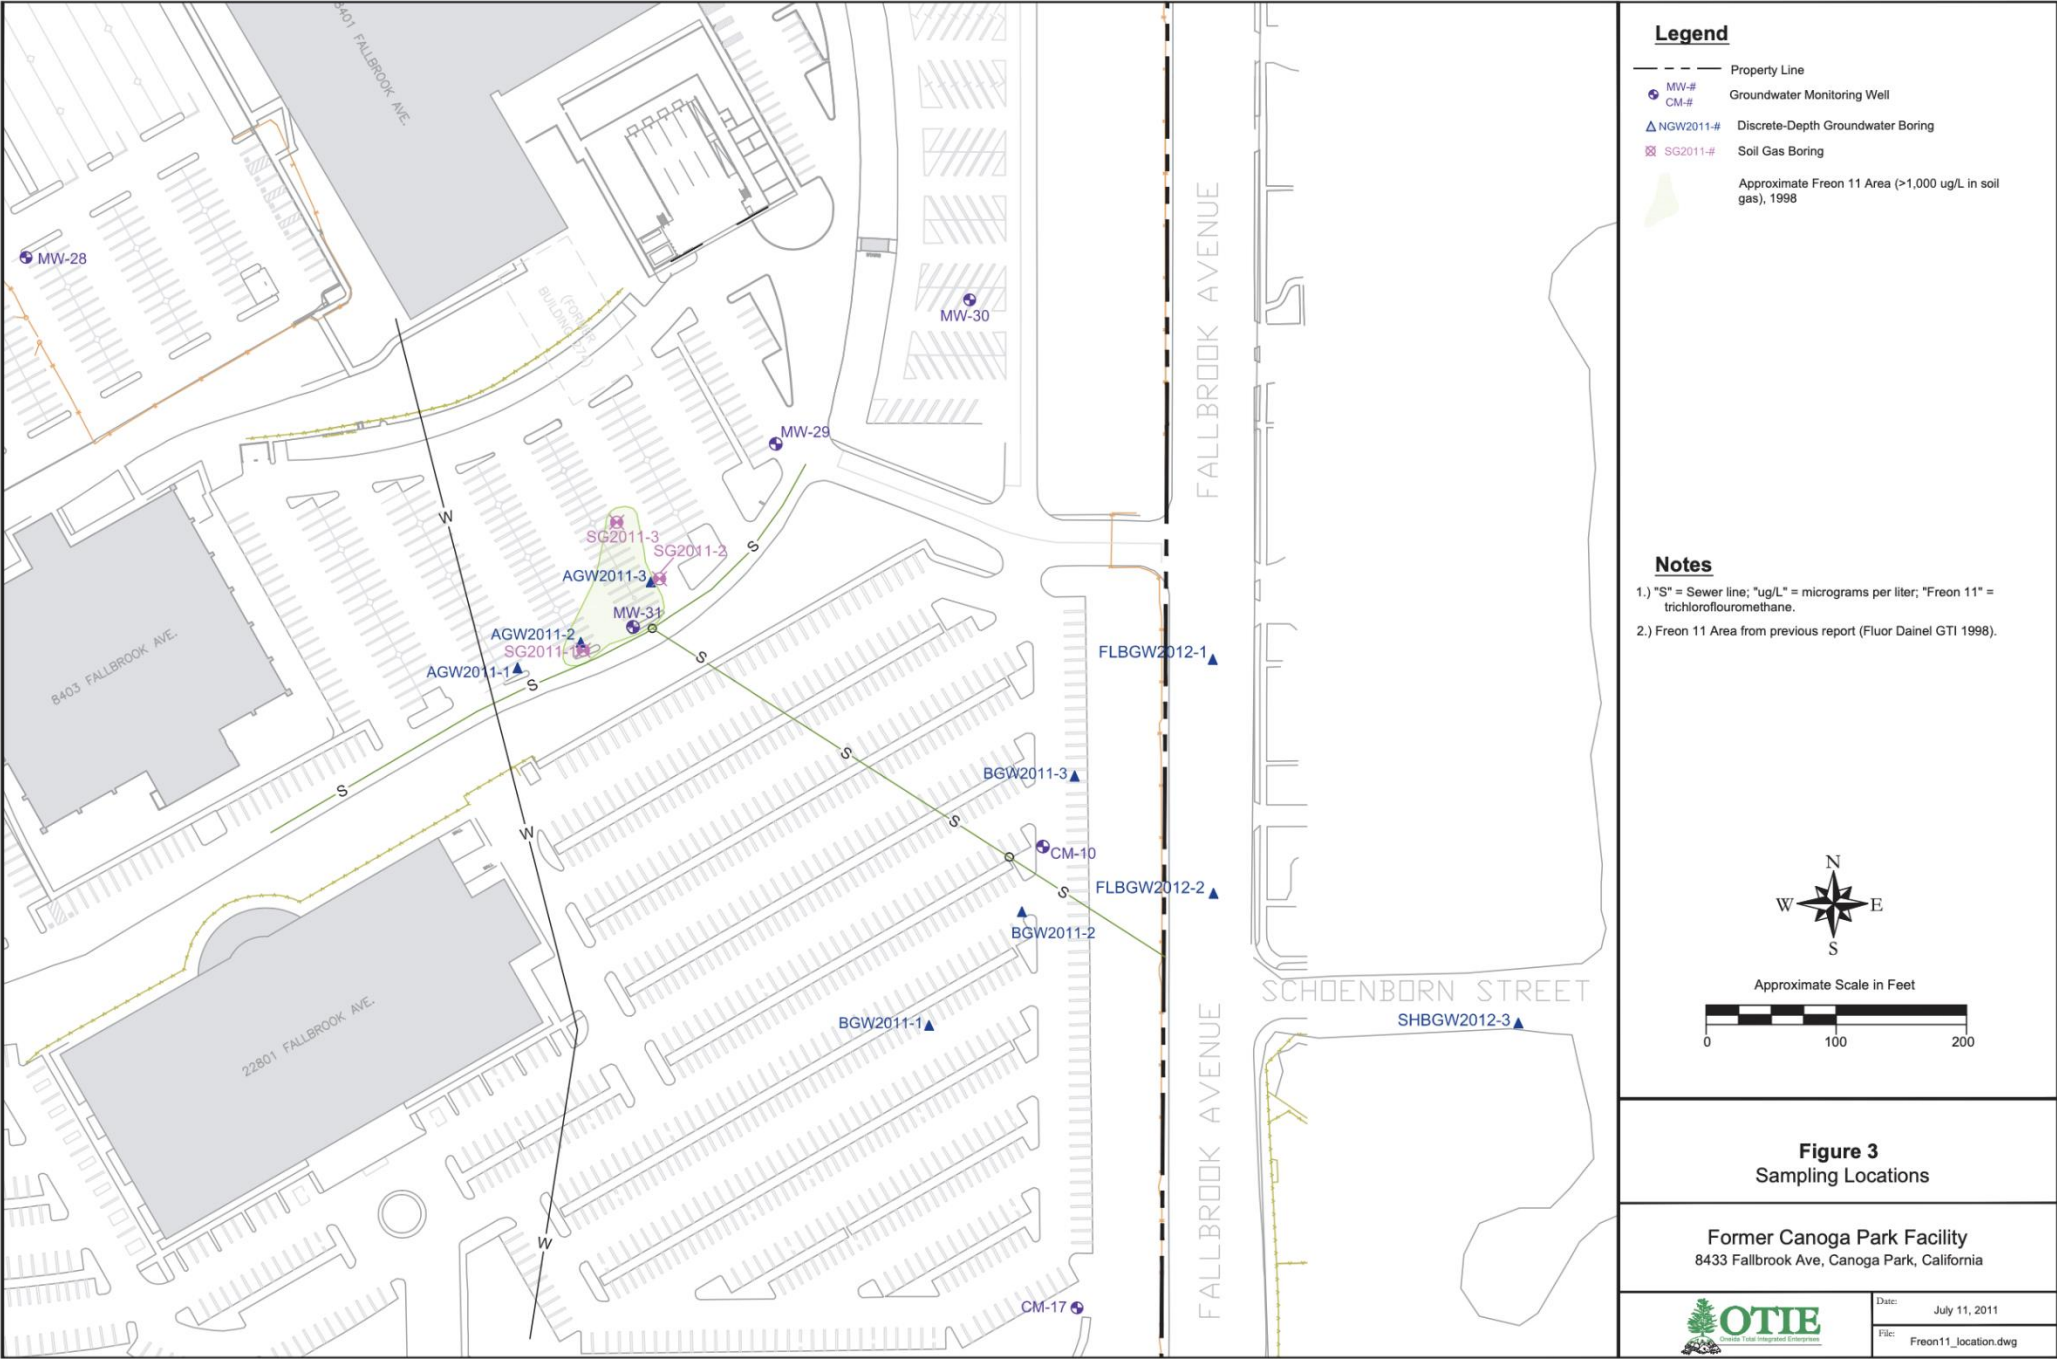

**Figure S17.** Temporary Soil Vapor Sampling Locations at Former Santa Fe Railyard, Boyle Heights, CA [79], Figure 4. 18

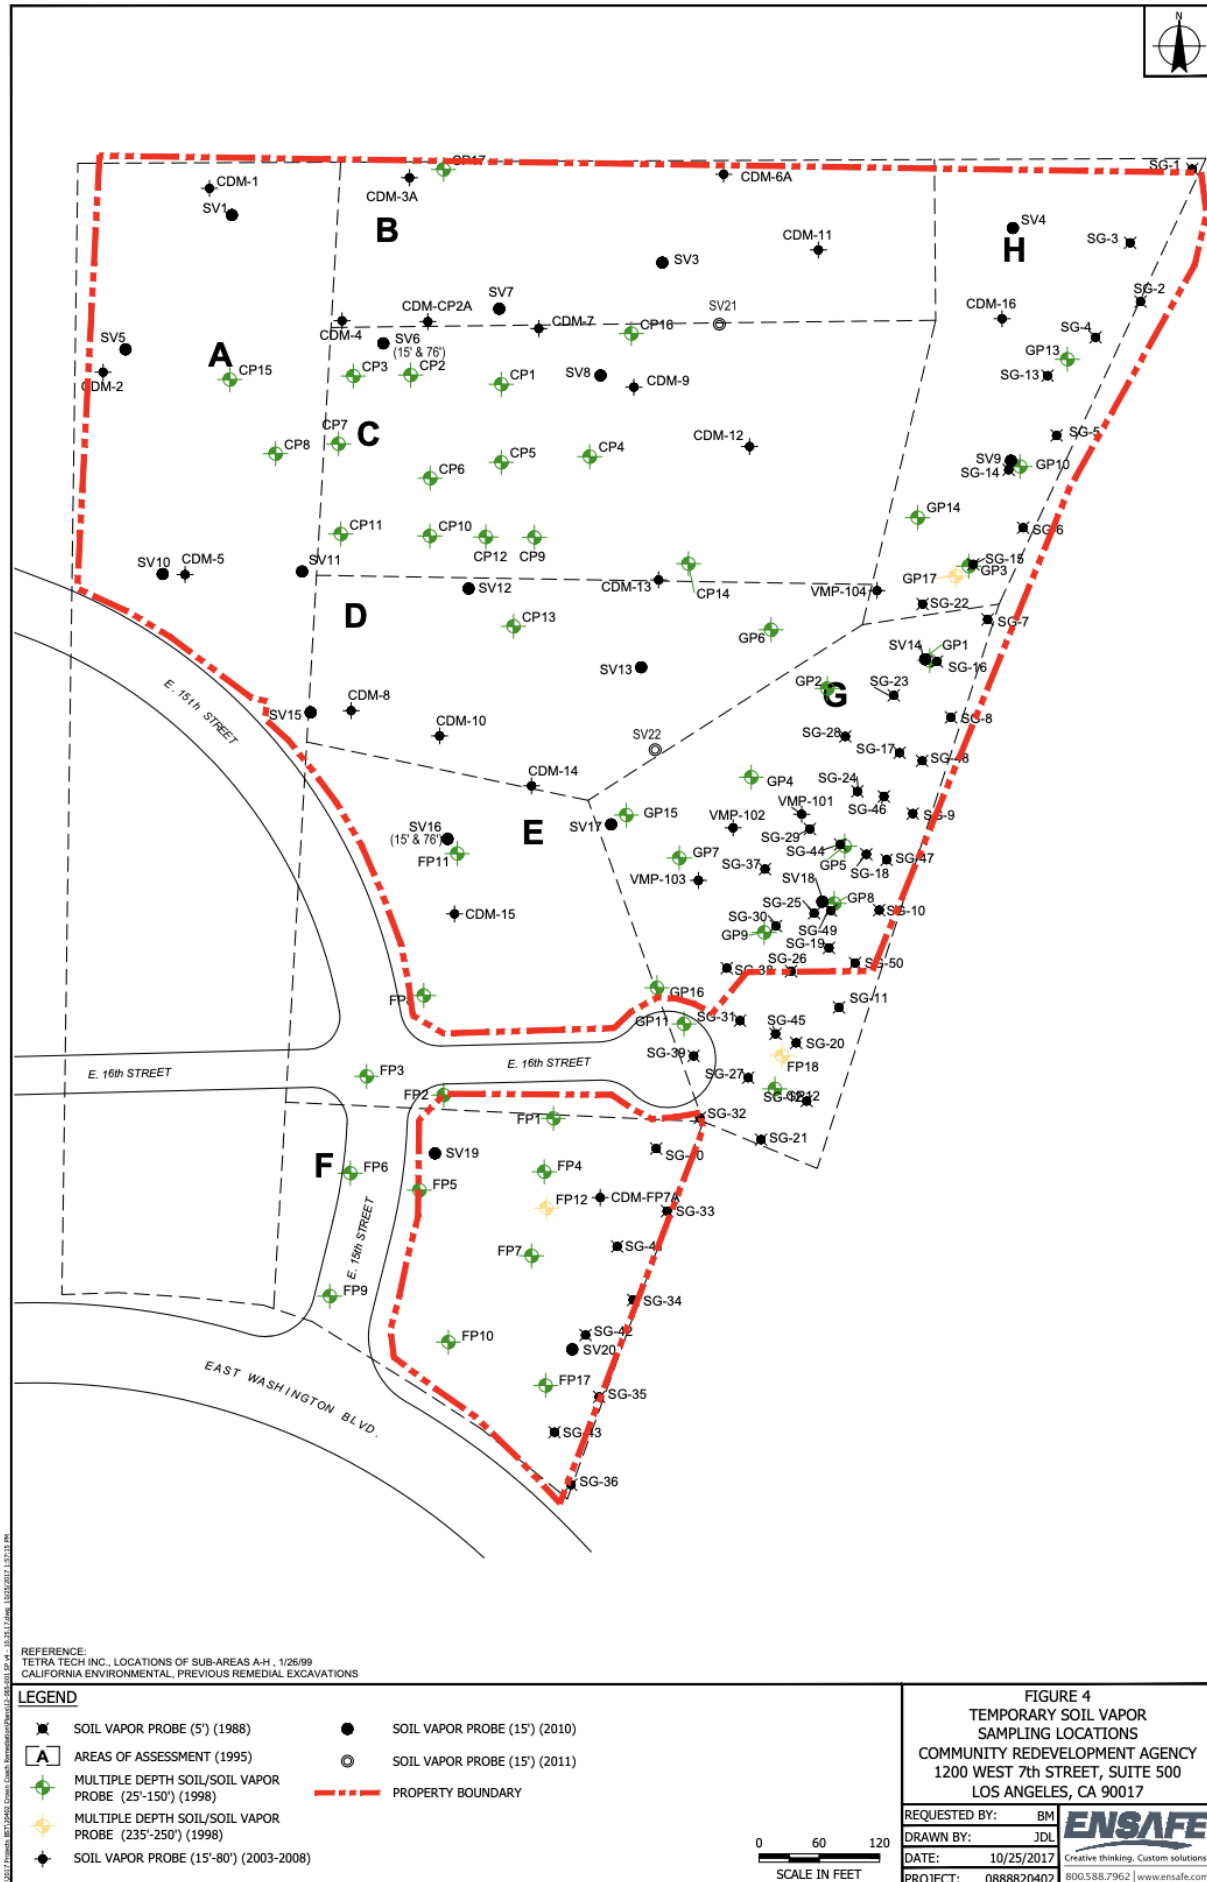

**Figure S18. “Hot-Spot” Sampling Locations at Former Naval Ordnance Test Station, Pasadena, CA [58], Figure 7.**

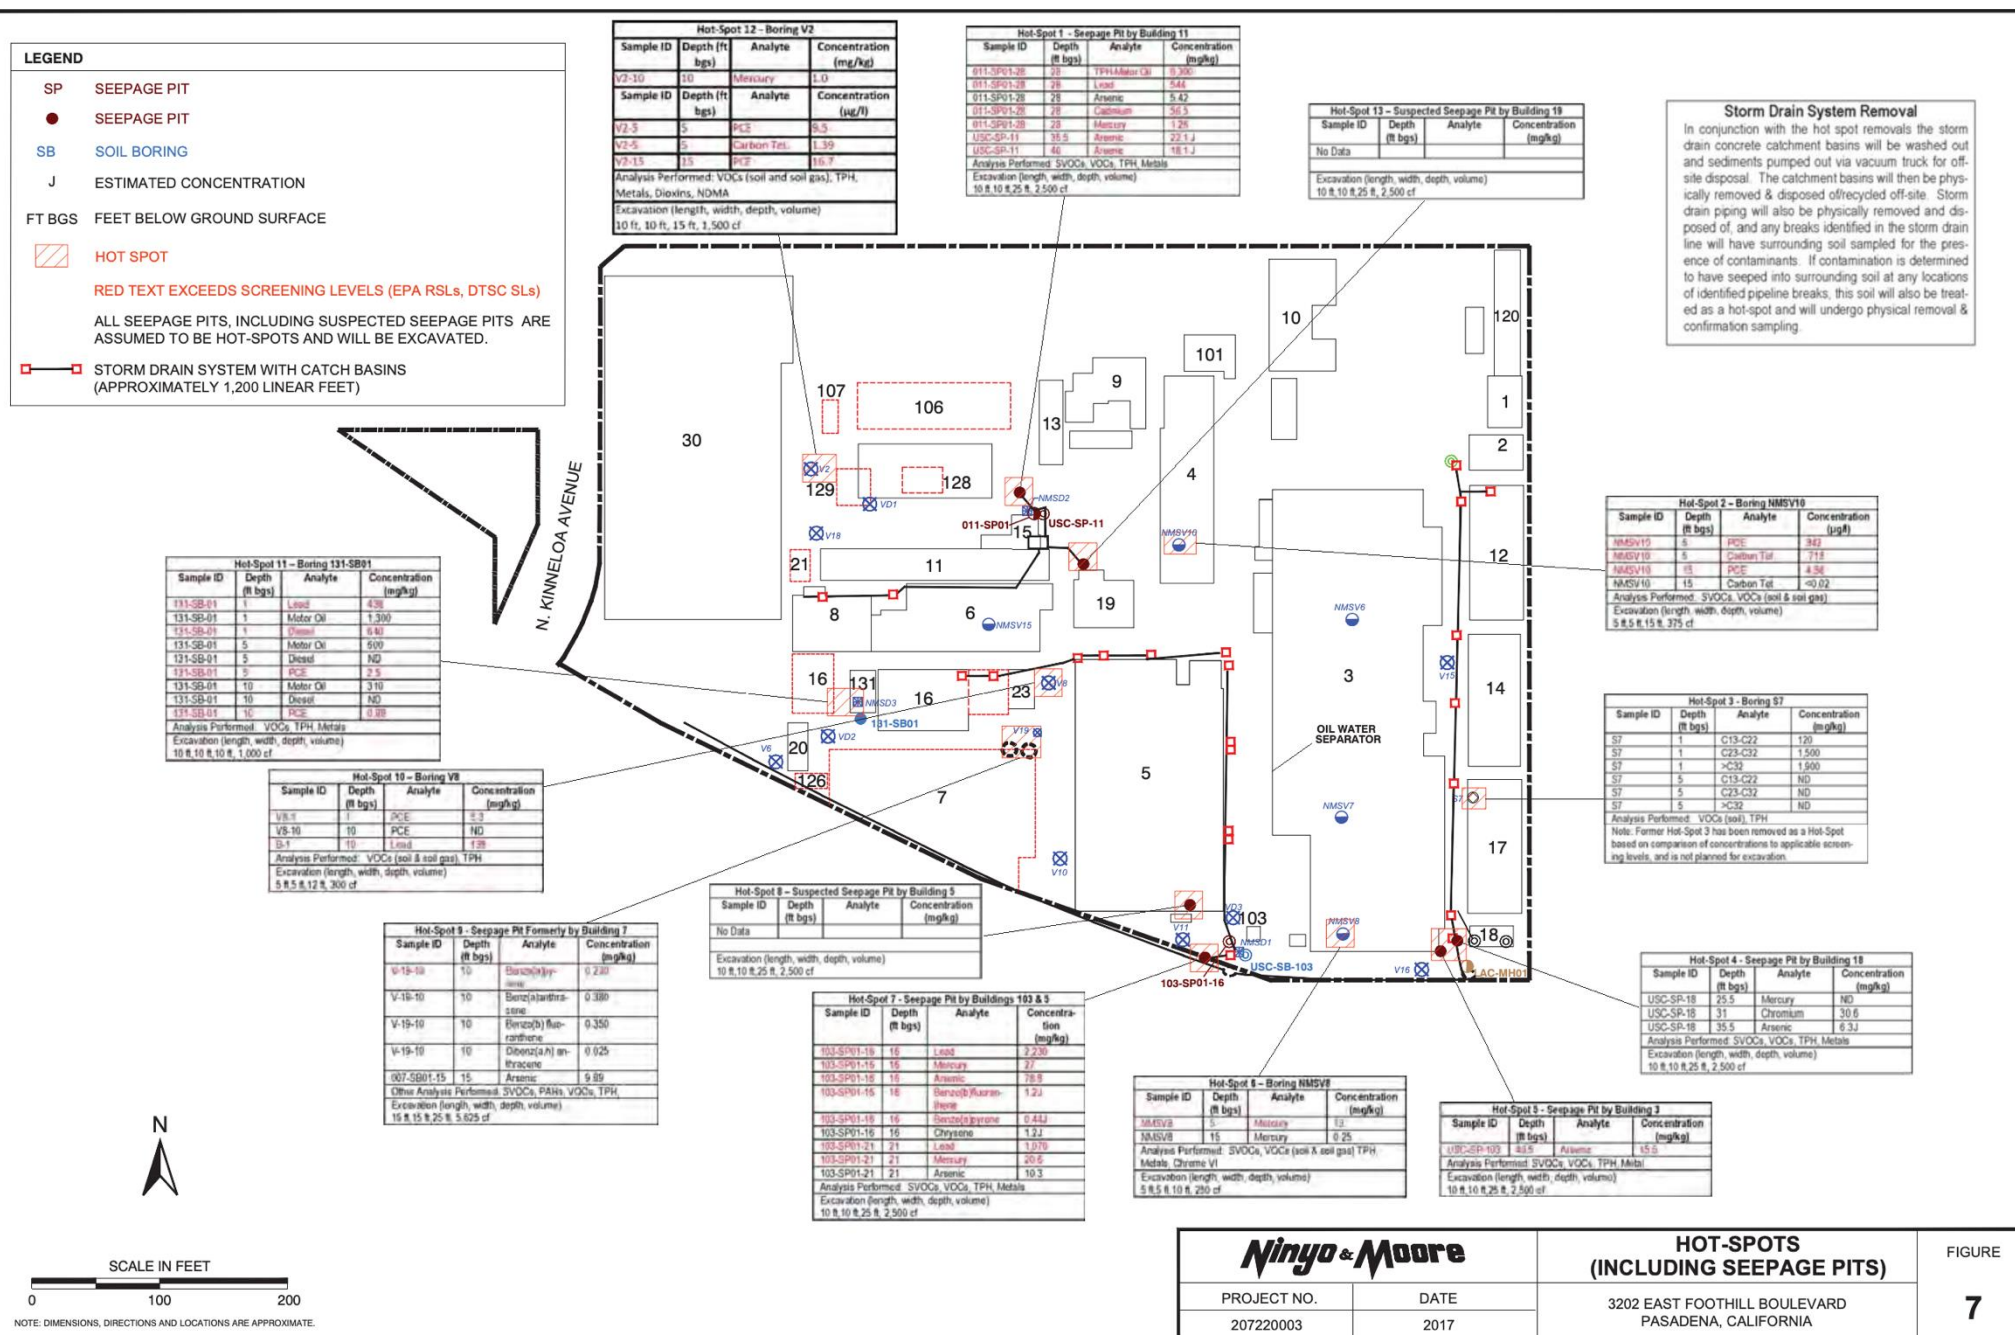

Supplement: Supplementary file 1 [file ijerph-19-07679-s001.zip › 6-2-22-ksf-Supplemental File S1b.pdf]
