# Supplementary material for: Does Hazardous-Waste Testing Follow Technical Guidance, Thus Help Protect Environmental Justice and Health?
Source: Int J Environ Res Public Health. 2022 Jun 23;19(13):7679. doi: 10.3390/ijerph19137679 (PMC9265884; doi:10.3390/ijerph19137679)
Supplement: Supplementary file 1 [file ijerph-19-07679-s001.zip]

Archive with 4 entries (4 files):
- 6-2-22-ksf-Supplemental File S1a.pdf
- 6-2-22-ksf-Supplemental File S1b.pdf
- 6-2-22-ksf-Supplemental File S1c.pdf
- 6-2-22-ksf-Supplemental S2.pdf
