# Supplementary material for: Does Hazardous-Waste Testing Follow Technical Guidance, Thus Help Protect Environmental Justice and Health?
Source: Int J Environ Res Public Health. 2022 Jun 23;19(13):7679. doi: 10.3390/ijerph19137679 (PMC9265884; doi:10.3390/ijerph19137679)
Supplement: Supplementary file 1 [file ijerph-19-07679-s001.zip › 6-2-22-ksf-Supplemental File S1c.pdf]

**Contents of Supplemental S1c**

**Tables**..... 20-33

Table S1..... 21-23

Table S2..... 24-30

Table S3..... 31

Table S4..... 32

Table S5..... 33

**Table S1.** Results for Soil-Vapor Samples at Former Naval Ordnance Test Station, Pasadena, CA [59], Table 3.

Former NIRF Undersea Center  
Pasadena, California

Appendix D  
Project No. 207220003

**TABLE 3 – 2007 REMEDIAL INVESTIGATION ANALYTICAL RESULTS FOR SOIL VAPOR SAMPLES - EPA METHOD 8260B**

| Sample ID      | Date Sample Collected | Depth (feet bgs) | VOCs (µg/l)          |            |                      |                         |                           |                    |                      |                          |           |                     |          |                       |                   |                        |               |            |
|----------------|-----------------------|------------------|----------------------|------------|----------------------|-------------------------|---------------------------|--------------------|----------------------|--------------------------|-----------|---------------------|----------|-----------------------|-------------------|------------------------|---------------|------------|
|                |                       |                  | Carbon Tetrachloride | Chloroform | Dibromochloromethane | Dichlorodifluoromethane | Dichlorotetrafluoroethane | 1,1-Dichloroethane | 1,1-Dichloroethylene | cis-1,2-Dichloroethylene | Freon 113 | Tetrachloroethylene | Toluene  | 1,1,1-Trichloroethane | Trichloroethylene | Trichlorofluoromethane | Total Xylenes | Other VOCs |
| V1-5           | 10/17/2007            | 5                | ND<0.020             | ND<0.020   | ND<0.020             | ND<0.020                | ND<0.020                  | ND<0.020           | ND<0.020             | ND<0.020                 | ND<0.020  | 0.414               | ND<0.020 | ND<0.020              | ND<0.020          | ND<0.020               | ND<0.020      | ND         |
| V1-15          | 10/17/2007            | 15               | ND<0.020             | ND<0.020   | ND<0.020             | ND<0.020                | ND<0.020                  | ND<0.020           | ND<0.020             | ND<0.020                 | ND<0.020  | 0.170               | ND<0.020 | ND<0.020              | ND<0.020          | ND<0.020               | ND<0.020      | ND         |
| V2-5           | 10/17/2007            | 5                | 1.39                 | ND<0.020   | ND<0.020             | 0.360                   | ND<0.020                  | ND<0.020           | ND<0.020             | ND<0.020                 | 2.21      | 9.47                | ND<0.020 | ND<0.020              | ND<0.020          | ND<0.020               | ND<0.020      | ND         |
| V2-15          | 10/17/2007            | 15               | ND<0.020             | ND<0.020   | ND<0.020             | 0.632                   | ND<0.020                  | ND<0.020           | ND<0.020             | ND<0.020                 | 2.87      | 16.7                | ND<0.020 | ND<0.020              | ND<0.020          | 0.102                  | ND<0.020      | ND         |
| V3-5           | 10/17/2007            | 5                | 0.462                | ND<0.020   | ND<0.020             | 0.212                   | ND<0.020                  | ND<0.020           | ND<0.020             | ND<0.020                 | 0.987     | 2.29                | ND<0.020 | ND<0.020              | ND<0.020          | ND<0.020               | 0.255         | ND         |
| V3-5 DUP       | 10/17/2007            | 5                | 0.456                | ND<0.020   | ND<0.020             | 0.186                   | ND<0.020                  | ND<0.020           | ND<0.020             | ND<0.020                 | 0.878     | 2.34                | ND<0.020 | ND<0.020              | ND<0.020          | ND<0.020               | ND<0.020      | ND         |
| V3-15          | 10/17/2007            | 15               | 0.775                | ND<0.020   | ND<0.020             | 0.488                   | ND<0.020                  | ND<0.020           | ND<0.020             | ND<0.020                 | 1.68      | 4.31                | ND<0.020 | ND<0.020              | ND<0.020          | 0.029                  | ND<0.020      | ND         |
| V4-5           | 10/16/2007            | 5                | ND<0.020             | ND<0.020   | ND<0.020             | 0.22                    | ND<0.020                  | ND<0.020           | ND<0.020             | ND<0.020                 | 0.304     | 3.78                | ND<0.020 | ND<0.020              | ND<0.020          | ND<0.020               | ND<0.020      | ND         |
| V4-15          | 10/16/2007            | 15               | ND<0.020             | ND<0.020   | ND<0.020             | 0.265                   | ND<0.020                  | ND<0.020           | ND<0.020             | ND<0.020                 | 5.03      | 4.79                | ND<0.020 | ND<0.020              | ND<0.020          | ND<0.020               | ND<0.020      | ND         |
| V5-5           | 10/16/2007            | 5                | ND<0.020             | ND<0.020   | ND<0.020             | 0.524                   | ND<0.020                  | ND<0.020           | ND<0.020             | ND<0.020                 | 0.649     | 28.8                | ND<0.020 | ND<0.020              | 0.811             | ND<0.020               | ND<0.020      | ND         |
| V5-15          | 10/16/2007            | 15               | 0.151                | ND<0.020   | ND<0.020             | 0.466                   | ND<0.020                  | ND<0.020           | ND<0.020             | ND<0.020                 | 0.878     | 35.3                | ND<0.020 | ND<0.020              | 496               | ND<0.020               | ND<0.020      | ND         |
| V5-15/QC9-SV** | 10/16/2007            | 15               | ND<0.020             | ND<0.020   | ND<0.020             | ND<0.020                | 4.01                      | ND<0.020           | ND<0.020             | ND<0.020                 | 1.80      | 79.0                | ND<0.020 | ND<0.020              | ND<0.020          | 1.06                   | ND<0.020      | ND         |
| V6-5           | 10/16/2007            | 5                | ND<0.020             | ND<0.020   | ND<0.020             | ND<0.020                | ND<0.020                  | ND<0.020           | ND<0.020             | ND<0.020                 | ND<0.020  | 6.75                | ND<0.020 | ND<0.020              | ND<0.020          | ND<0.020               | ND<0.020      | ND         |
| V6-15          | 10/16/2007            | 15               | ND<0.020             | ND<0.020   | ND<0.020             | 0.153                   | ND<0.020                  | ND<0.020           | ND<0.020             | ND<0.020                 | 0.317     | 20.5                | ND<0.020 | ND<0.020              | ND<0.020          | ND<0.020               | ND<0.020      | ND         |
| V7-5           | 10/17/2007            | 5                | ND<0.020             | ND<0.020   | ND<0.020             | 0.034                   | ND<0.020                  | ND<0.020           | ND<0.020             | ND<0.020                 | ND<0.020  | 1.31                | 0.121    | ND<0.020              | ND<0.020          | ND<0.020               | ND<0.020      | ND         |
| V7-15          | 10/17/2007            | 15               | 0.464                | ND<0.020   | ND<0.020             | 0.338                   | ND<0.020                  | ND<0.020           | ND<0.020             | ND<0.020                 | 0.084     | 2.75                | ND<0.020 | ND<0.020              | ND<0.020          | 0.239                  | ND<0.020      | ND         |
| V8-5           | 10/16/2007            | 5                | 0.462                | ND<0.020   | 0.998                | ND<0.020                | ND<0.020                  | ND<0.020           | ND<0.020             | ND<0.020                 | 0.439     | 6.78                | ND<0.020 | ND<0.020              | ND<0.020          | 3.12                   | ND<0.020      | ND         |
| V8-15          | 10/16/2007            | 15               | 1.36                 | ND<0.020   | ND<0.020             | 1.09                    | ND<0.020                  | ND<0.020           | ND<0.020             | ND<0.020                 | 1.31      | 10.5                | ND<0.020 | ND<0.020              | ND<0.020          | ND<0.020               | ND<0.020      | ND         |
| V9-5           | 10/18/2007            | 5                | 0.265                | ND<0.020   | ND<0.020             | ND<0.020                | ND<0.020                  | ND<0.020           | ND<0.020             | ND<0.020                 | 0.477     | 55.6                | 0.239    | 0.063                 | ND<0.020          | ND<0.020               | 0.367         | ND         |
| V9-15          | 10/18/2007            | 15               | 0.359                | ND<0.020   | ND<0.020             | 0.732                   | ND<0.020                  | ND<0.020           | ND<0.020             | ND<0.020                 | 2.12      | 137                 | ND<0.020 | ND<0.020              | ND<0.020          | 0.149                  | ND<0.020      | ND         |
| V9-15/QC4-SV** | 10/18/2007            | 15               | 0.397                | ND<0.020   | ND<0.020             | 1.06                    | ND<0.020                  | ND<0.020           | ND<0.020             | ND<0.020                 | 0.341     | 47.1                | ND<0.020 | ND<0.020              | ND<0.020          | ND<0.020               | ND<0.020      | ND         |
| V10-5          | 10/17/2007            | 5                | 0.694                | ND<0.020   | ND<0.020             | 0.230                   | ND<0.020                  | ND<0.020           | ND<0.020             | ND<0.020                 | 0.662     | 36.3                | ND<0.020 | ND<0.020              | ND<0.020          | ND<0.020               | ND<0.020      | ND         |
| V10-15         | 10/17/2007            | 15               | 1.09                 | ND<0.020   | ND<0.020             | 0.666                   | ND<0.020                  | ND<0.020           | ND<0.020             | ND<0.020                 | 1.45      | 34.1                | ND<0.020 | ND<0.020              | ND<0.020          | 0.077                  | ND<0.020      | ND         |
| V11-5          | 10/18/2007            | 5                | 0.466                | ND<0.020   | ND<0.020             | 0.038                   | ND<0.020                  | ND<0.020           | ND<0.020             | ND<0.020                 | ND<0.020  | 4.04                | ND<0.020 | ND<0.020              | ND<0.020          | ND<0.020               | ND<0.020      | ND         |
| V11-15         | 10/18/2007            | 15               | ND<0.020             | ND<0.020   | ND<0.020             | 0.259                   | ND<0.020                  | ND<0.020           | ND<0.020             | ND<0.020                 | 0.233     | 7.98                | ND<0.020 | ND<0.020              | ND<0.020          | ND<0.020               | ND<0.020      | ND         |
| V12-5          | 10/17/2007            | 5                | 0.789                | ND<0.020   | ND<0.020             | 0.170                   | ND<0.020                  | ND<0.020           | ND<0.020             | ND<0.020                 | 0.100     | 2.53                | ND<0.020 | ND<0.020              | ND<0.020          | 0.212                  | 0.718         | ND         |
| V12-15         | 10/17/2007            | 15               | 1.19                 | ND<0.020   | ND<0.020             | 0.588                   | ND<0.020                  | ND<0.020           | ND<0.020             | ND<0.020                 | 0.499     | 5.69                | ND<0.020 | ND<0.020              | ND<0.020          | 0.856                  | ND<0.020      | ND         |
| V13-5          | 10/17/2007            | 5                | ND<0.020             | ND<0.020   | ND<0.020             | ND<0.020                | ND<0.020                  | ND<0.020           | ND<0.020             | ND<0.020                 | ND<0.020  | 0.288               | ND<0.020 | ND<0.020              | ND<0.020          | ND<0.020               | ND<0.020      | ND         |
| V13-15         | 10/17/2007            | 15               | ND<0.020             | ND<0.020   | ND<0.020             | 0.114                   | ND<0.020                  | ND<0.020           | ND<0.020             | ND<0.020                 | ND<0.020  | 0.309               | ND<0.020 | ND<0.020              | ND<0.020          | 0.059                  | ND<0.020      | ND         |
| V14-5          | 10/17/2007            | 5                | 0.220                | ND<0.020   | ND<0.020             | 0.051                   | ND<0.020                  | ND<0.020           | ND<0.020             | ND<0.020                 | ND<0.020  | 0.662               | ND<0.020 | ND<0.020              | ND<0.020          | 0.277                  | ND<0.020      | ND         |
| V14-15         | 10/17/2007            | 15               | 0.438                | ND<0.020   | ND<0.020             | 0.360                   | ND<0.020                  | ND<0.020           | ND<0.020             | ND<0.020                 | ND<0.020  | 0.860               | ND<0.020 | ND<0.020              | ND<0.020          | 1.12                   | ND<0.020      | ND         |
| V15-5          | 10/17/2007            | 5                | 0.044                | ND<0.020   | ND<0.020             | ND<0.020                | ND<0.020                  | ND<0.020           | ND<0.020             | ND<0.020                 | ND<0.020  | 0.502               | ND<0.020 | ND<0.020              | ND<0.020          | ND<0.020               | ND<0.020      | ND         |
| V15-15         | 10/17/2007            | 15               | ND<0.020             | ND<0.020   | ND<0.020             | 0.140                   | ND<0.020                  | ND<0.020           | ND<0.020             | ND<0.020                 | ND<0.020  | 0.221               | ND<0.020 | ND<0.020              | ND<0.020          | 0.274                  | ND<0.020      | ND         |
| V16-5          | 10/18/2007            | 5                | ND<0.020             | ND<0.020   | ND<0.020             | ND<0.020                | ND<0.020                  | ND<0.020           | ND<0.020             | ND<0.020                 | ND<0.020  | 0.366               | ND<0.020 | ND<0.020              | ND<0.020          | 3.88                   | ND<0.020      | ND         |
| V16-15         | 10/18/2007            | 15               | ND<0.020             | ND<0.020   | ND<0.020             | 0.083                   | ND<0.020                  | ND<0.020           | ND<0.020             | ND<0.020                 | ND<0.020  | 0.171               | ND<0.020 | ND<0.020              | ND<0.020          | 2.71                   | ND<0.020      | ND         |
| V17-5          | 10/16/2007            | 5                | 0.024                | ND<0.020   | ND<0.020             | 0.031                   | ND<0.020                  | ND<0.020           | ND<0.020             | ND<0.020                 | ND<0.020  | 0.965               | ND<0.020 | ND<0.020              | ND<0.020          | ND<0.020               | ND<0.020      | ND         |
| V17-15         | 10/16/2007            | 15               | ND<0.020             | ND<0.020   | ND<0.020             | 0.199                   | ND<0.020                  | ND<0.020           | ND<0.020             | ND<0.020                 | 0.199     | 1.61                | ND<0.020 | ND<0.020              | ND<0.020          | ND<0.020               | ND<0.020      | ND         |
| V18-5          | 10/17/2007            | 5                | 0.527                | ND<0.020   | ND<0.020             | 0.117                   | ND<0.020                  | ND<0.020           | ND<0.020             | ND<0.020                 | 0.775     | 8.32                | ND<0.020 | ND<0.020              | ND<0.020          | ND<0.020               | ND<0.020      | ND         |

**Table S1.** Results for Soil-Vapor Samples at Former Naval Ordnance Test Station, Pasadena, CA [59], Table 3.  
Former NIRF Undersea Center  
Pasadena, California

**TABLE 3 – 2007 REMEDIAL INVESTIGATION ANALYTICAL RESULTS FOR SOIL VAPOR SAMPLES - EPA METHOD 8260B**

| Sample ID    | Date Sample Collected | Depth (feet bgs) | VOCs (µg/l)          |            |                      |                         |                           |                    |                      |                          |           |                     |          |                       |                   |                        |               |            |
|--------------|-----------------------|------------------|----------------------|------------|----------------------|-------------------------|---------------------------|--------------------|----------------------|--------------------------|-----------|---------------------|----------|-----------------------|-------------------|------------------------|---------------|------------|
|              |                       |                  | Carbon Tetrachloride | Chloroform | Dibromochloromethane | Dichlorodifluoromethane | Dichlorotetrafluoroethane | 1,1-Dichloroethane | 1,1-Dichloroethylene | cis-1,2-Dichloroethylene | Freon 113 | Tetrachloroethylene | Toluene  | 1,1,1-Trichloroethane | Trichloroethylene | Trichlorofluoromethane | Total Xylenes | Other VOCs |
| V18-15       | 10/17/2007            | 15               | 0.636                | ND<0.020   | ND<0.020             | 0.130                   | ND<0.020                  | ND<0.020           | ND<0.020             | ND<0.020                 | 0.863     | 13.5                | ND<0.020 | ND<0.020              | ND<0.020          | ND<0.020               | ND<0.020      | ND         |
| V19-5        | 10/17/2007            | 5                | 0.338                | ND<0.020   | ND<0.020             | 0.234                   | ND<0.020                  | ND<0.020           | ND<0.020             | ND<0.020                 | 0.695     | 30.2                | ND<0.020 | 0.060                 | ND<0.020          | ND<0.020               | ND<0.020      | ND         |
| V19-10       | 10/17/2007            | 10               | 0.588                | ND<0.020   | ND<0.020             | 0.533                   | ND<0.020                  | ND<0.020           | ND<0.020             | ND<0.020                 | 1.17      | 39.1                | ND<0.020 | ND<0.020              | ND<0.020          | 0.160                  | ND<0.020      | ND         |
| NMSV1-5      | 10/16/2007            | 5                | 0.170                | ND<0.020   | ND<0.020             | 0.198                   | ND<0.020                  | ND<0.020           | ND<0.020             | ND<0.020                 | .312      | 7.56                | ND<0.020 | ND<0.020              | ND<0.020          | ND<0.020               | ND<0.020      | ND         |
| NMSV1-15     | 10/16/2007            | 15               | ND<0.020             | ND<0.020   | ND<0.020             | 0.222                   | ND<0.020                  | ND<0.020           | ND<0.020             | ND<0.020                 | .459      | 9.59                | ND<0.020 | ND<0.020              | ND<0.020          | ND<0.020               | ND<0.020      | ND         |
| NMSV2-5      | 10/16/2007            | 5                | ND<0.020             | ND<0.020   | ND<0.020             | ND<0.020                | ND<0.020                  | ND<0.020           | ND<0.020             | ND<0.020                 | 0.347     | 4.78                | ND<0.020 | ND<0.020              | ND<0.020          | ND<0.020               | ND<0.020      | ND         |
| NMSV2-5 Dup  | 10/16/2007            | 5                | 0.267                | ND<0.020   | ND<0.020             | ND<0.020                | ND<0.020                  | ND<0.020           | ND<0.020             | ND<0.020                 | 3.67      | 5.17                | ND<0.020 | ND<0.020              | ND<0.020          | ND<0.020               | ND<0.020      | ND         |
| NMSV2-15     | 10/16/2007            | 15               | ND<0.020             | ND<0.020   | ND<0.020             | 0.299                   | ND<0.020                  | ND<0.020           | ND<0.020             | ND<0.020                 | .596      | 7.13                | ND<0.020 | ND<0.020              | ND<0.020          | ND<0.020               | ND<0.020      | ND         |
| NMSV2-15 Dup | 10/16/2007            | 15               | 0.074                | ND<0.020   | ND<0.020             | 0.315                   | ND<0.020                  | ND<0.020           | ND<0.020             | ND<0.020                 | .787      | 10.2                | ND<0.020 | ND<0.020              | ND<0.020          | ND<0.020               | ND<0.020      | ND         |
| NMSV3-5      | 10/17/2007            | 5                | 0.210                | ND<0.020   | ND<0.020             | 0.032                   | ND<0.020                  | ND<0.020           | ND<0.020             | ND<0.020                 | ND<0.020  | 0.510               | ND<0.020 | ND<0.020              | ND<0.020          | 0.097                  | ND<0.020      | ND         |
| NMSV3-15     | 10/17/2007            | 15               | ND<0.020             | ND<0.020   | ND<0.020             | 0.292                   | ND<0.020                  | ND<0.020           | ND<0.020             | ND<0.020                 | ND<0.020  | 0.747               | ND<0.020 | ND<0.020              | ND<0.020          | 0.780                  | ND<0.020      | ND         |
| NMSV4-5      | 10/18/2007            | 5                | ND<0.020             | ND<0.020   | ND<0.020             | ND<0.020                | ND<0.020                  | ND<0.020           | ND<0.020             | ND<0.020                 | ND<0.020  | 0.897               | ND<0.020 | ND<0.020              | ND<0.020          | ND<0.020               | ND<0.020      | ND         |
| NMSV4-15     | 10/18/2007            | 15               | ND<0.020             | ND<0.020   | ND<0.020             | 0.075                   | ND<0.020                  | ND<0.020           | ND<0.020             | ND<0.020                 | ND<0.020  | 1.29                | ND<0.020 | ND<0.020              | ND<0.020          | ND<0.020               | ND<0.020      | ND         |
| NMSV5-5      | 10/16/2007            | 5                | ND<0.020             | ND<0.020   | ND<0.020             | 0.082                   | ND<0.020                  | ND<0.020           | ND<0.020             | ND<0.020                 | ND<0.020  | 0.237               | ND<0.020 | ND<0.020              | ND<0.020          | ND<0.020               | ND<0.020      | ND         |
| NMSV5-15     | 10/16/2007            | 15               | ND<0.020             | ND<0.020   | ND<0.020             | 0.090                   | ND<0.020                  | ND<0.020           | ND<0.020             | ND<0.020                 | ND<0.020  | 0.281               | ND<0.020 | ND<0.020              | ND<0.020          | ND<0.020               | ND<0.020      | ND         |
| NMSV6-5      | 10/18/2007            | 5                | 1.38                 | ND<0.020   | ND<0.020             | 0.351                   | ND<0.020                  | ND<0.020           | ND<0.020             | ND<0.020                 | 0.125     | 3.55                | ND<0.020 | ND<0.020              | ND<0.020          | 1.55                   | 0.205         | ND         |
| NMSV6-15     | 10/18/2007            | 15               | ND<0.020             | 0.072      | ND<0.020             | 0.882                   | ND<0.020                  | ND<0.020           | ND<0.020             | ND<0.020                 | 0.595     | 6.56                | ND<0.020 | ND<0.020              | ND<0.020          | 2.63                   | ND<0.020      | ND         |
| NMSV7-5      | 10/18/2007            | 5                | 1.82                 | ND<0.020   | ND<0.020             | ND<0.020                | ND<0.020                  | ND<0.020           | ND<0.020             | ND<0.020                 | 0.047     | 6.63                | ND<0.020 | ND<0.020              | ND<0.020          | 1.85                   | ND<0.020      | ND         |
| NMSV7-15     | 10/18/2007            | 15               | ND<0.020             | 0.03       | ND<0.020             | 0.633                   | ND<0.020                  | ND<0.020           | ND<0.020             | ND<0.020                 | 0.179     | 6.95                | ND<0.020 | ND<0.020              | ND<0.020          | ND<0.020               | ND<0.020      | ND         |
| NMSV8-5      | 10/18/2007            | 5                | 0.571                | ND<0.020   | ND<0.020             | 0.039                   | ND<0.020                  | ND<0.020           | ND<0.020             | ND<0.020                 | ND<0.020  | 3.03                | ND<0.020 | ND<0.020              | ND<0.020          | 1.08                   | ND<0.020      | ND         |
| NMSV8-5 DUP  | 10/18/2007            | 5                | 0.515                | ND<0.020   | ND<0.020             | ND<0.020                | ND<0.020                  | ND<0.020           | ND<0.020             | ND<0.020                 | ND<0.020  | 2.92                | ND<0.020 | ND<0.020              | ND<0.020          | 0.949                  | ND<0.020      | ND         |
| NMSV8-15     | 10/18/2007            | 15               | 0.583                | ND<0.020   | ND<0.020             | 0.199                   | ND<0.020                  | ND<0.020           | ND<0.020             | ND<0.020                 | ND<0.020  | 3.26                | ND<0.020 | ND<0.020              | ND<0.020          | 1.32                   | ND<0.020      | ND         |
| NMSV8-15 DUP | 10/18/2007            | 5                | ND<0.020             | ND<0.020   | ND<0.020             | 0.176                   | ND<0.020                  | ND<0.020           | ND<0.020             | ND<0.020                 | ND<0.020  | 2.88                | ND<0.020 | ND<0.020              | ND<0.020          | 1.15                   | ND<0.020      | ND         |
| NMSV9-5      | 10/18/2007            | 5                | 0.476                | ND<0.020   | ND<0.020             | 0.079                   | ND<0.020                  | ND<0.020           | ND<0.020             | ND<0.020                 | 0.066     | 1.69                | ND<0.020 | ND<0.020              | ND<0.020          | ND<0.020               | ND<0.020      | ND         |
| NMSV9-15     | 10/18/2007            | 15               | ND<0.020             | ND<0.020   | ND<0.020             | 0.310                   | ND<0.020                  | ND<0.020           | ND<0.020             | ND<0.020                 | 0.364     | 2.64                | ND<0.020 | ND<0.020              | ND<0.020          | 0.340                  | ND<0.020      | ND         |
| NMSV10-5     | 10/18/2007            | 5                | 0.713                | ND<0.020   | ND<0.020             | 0.153                   | ND<0.020                  | ND<0.020           | ND<0.020             | ND<0.020                 | 0.202     | 342                 | ND<0.020 | ND<0.020              | ND<0.020          | 0.087                  | ND<0.020      | ND         |
| NMSV10-15    | 10/18/2007            | 15               | ND<0.020             | ND<0.020   | ND<0.020             | 0.435                   | ND<0.020                  | ND<0.020           | ND<0.020             | ND<0.020                 | 0.518     | 4.58                | ND<0.020 | ND<0.020              | ND<0.020          | 0.519                  | ND<0.020      | ND         |
| NMSV11-5     | 10/18/2007            | 5                | 0.939                | ND<0.020   | ND<0.020             | 0.165                   | ND<0.020                  | ND<0.020           | ND<0.020             | ND<0.020                 | 0.237     | 8.48                | ND<0.020 | ND<0.020              | ND<0.020          | ND<0.020               | ND<0.020      | ND         |
| NMSV11-15    | 10/18/2007            | 15               | ND<0.020             | ND<0.020   | ND<0.020             | 0.413                   | ND<0.020                  | ND<0.020           | ND<0.020             | ND<0.020                 | 0.489     | 13.5                | ND<0.020 | ND<0.020              | ND<0.020          | 0.147                  | ND<0.020      | ND         |
| NMSV12-5     | 10/18/2007            | 5                | 0.569                | ND<0.020   | ND<0.020             | 0.078                   | ND<0.020                  | ND<0.020           | ND<0.020             | ND<0.020                 | ND<0.020  | 8.89                | ND<0.020 | ND<0.020              | ND<0.020          | ND<0.020               | ND<0.020      | ND         |
| NMSV12-15    | 10/18/2007            | 15               | ND<0.020             | ND<0.020   | ND<0.020             | 0.315                   | ND<0.020                  | ND<0.020           | ND<0.020             | ND<0.020                 | 0.259     | 14.2                | ND<0.020 | ND<0.020              | ND<0.020          | ND<0.020               | ND<0.020      | ND         |
| NMSV13-5     | 10/16/2007            | 5                | ND<0.020             | ND<0.020   | ND<0.020             | 0.157                   | ND<0.020                  | ND<0.020           | ND<0.020             | ND<0.020                 | 0.567     | 5.51                | ND<0.020 | ND<0.020              | ND<0.020          | ND<0.020               | ND<0.020      | ND         |
| NMSV13-15    | 10/16/2007            | 15               | 0.218                | ND<0.020   | ND<0.020             | 0.122                   | ND<0.020                  | ND<0.020           | ND<0.020             | ND<0.020                 | 0.334     | 2.83                | ND<0.020 | ND<0.020              | ND<0.020          | ND<0.020               | ND<0.020      | ND         |
| NMSV14-5     | 10/17/2007            | 5                | 0.176                | ND<0.020   | ND<0.020             | 0.070                   | ND<0.020                  | ND<0.020           | ND<0.020             | ND<0.020                 | 0.025     | 4.64                | 0.244    | ND<0.020              | ND<0.020          | ND<0.020               | 0.362         | ND         |
| NMSV14-15    | 10/17/2007            | 15               | 0.232                | ND<0.020   | ND<0.020             | 0.331                   | ND<0.020                  | ND<0.020           | ND<0.020             | ND<0.020                 | 0.486     | 11.6                | ND<0.020 | ND<0.020              | ND<0.020          | 0.357                  | ND<0.020      | ND         |
| NMSV15-5     | 10/16/2007            | 5                | 0.334                | ND<0.020   | ND<0.020             | 0.256                   | ND<0.020                  | ND<0.020           | ND<0.020             | ND<0.020                 | 0.191     | 7.78                | ND<0.020 | ND<0.020              | ND<0.020          | ND<0.020               | ND<0.020      | ND         |
| NMSV15-15    | 10/16/2007            | 15               | ND<0.020             | ND<0.020   | ND<0.020             | 0.631                   | ND<0.020                  | ND<0.020           | ND<0.020             | ND<0.020                 | 0.657     | 14.2                | ND<0.020 | ND<0.020              | 0.704             | ND<0.020               | ND<0.020      | ND         |
| VD1-20       | 10/16/2007            | 20               | ND<0.020             | ND<0.020   | ND<0.020             | 0.462                   | ND<0.020                  | ND<0.020           | ND<0.020             | ND<0.020                 | 1.77      | 20.4                | ND<0.020 | ND<0.020              | ND<0.020          | 0.066                  | ND<0.020      | ND         |

**Table S1.** Results for Soil-Vapor Samples at Former Naval Ordnance Test Station, Pasadena, CA [59], Table 3.  
Former NIRF Undersea Center  
Pasadena, California

**TABLE 3 – 2007 REMEDIAL INVESTIGATION ANALYTICAL RESULTS FOR SOIL VAPOR SAMPLES - EPA METHOD 8260B**

| Sample ID                                                                                                                                                                                                                                                                                                                                                                                                                                                                                                                                                                                                                                                                                                                              | Date Sample Collected | Depth (feet bgs) | VOCs (µg/l)          |            |                      |                         |                           |                    |                      |                          |           |                     |          |                       |                   |                        |               |            |
|----------------------------------------------------------------------------------------------------------------------------------------------------------------------------------------------------------------------------------------------------------------------------------------------------------------------------------------------------------------------------------------------------------------------------------------------------------------------------------------------------------------------------------------------------------------------------------------------------------------------------------------------------------------------------------------------------------------------------------------|-----------------------|------------------|----------------------|------------|----------------------|-------------------------|---------------------------|--------------------|----------------------|--------------------------|-----------|---------------------|----------|-----------------------|-------------------|------------------------|---------------|------------|
|                                                                                                                                                                                                                                                                                                                                                                                                                                                                                                                                                                                                                                                                                                                                        |                       |                  | Carbon Tetrachloride | Chloroform | Dibromochloromethane | Dichlorodifluoromethane | Dichlorotetrafluoroethane | 1,1-Dichloroethane | 1,1-Dichloroethylene | cis-1,2-Dichloroethylene | Freon 113 | Tetrachloroethylene | Toluene  | 1,1,1-Trichloroethane | Trichloroethylene | Trichlorofluoromethane | Total Xylenes | Other VOCs |
| VD1-30                                                                                                                                                                                                                                                                                                                                                                                                                                                                                                                                                                                                                                                                                                                                 | 10/16/2007            | 30               | ND<0.020             | ND<0.020   | ND<0.020             | 0.444                   | ND<0.020                  | ND<0.020           | ND<0.020             | ND<0.020                 | 2.05      | 8.98                | ND<0.020 | ND<0.020              | 0.049             | 0.079                  | ND<0.020      | ND         |
| VD1-30/QC1-SV**                                                                                                                                                                                                                                                                                                                                                                                                                                                                                                                                                                                                                                                                                                                        | 10/16/2007            | 30               | 2.27                 | ND<0.020   | ND<0.020             | ND<0.020                | 3.67                      | ND<0.020           | ND<0.020             | ND<0.020                 | 3.89      | 10.8                | 0.228    | ND<0.020              | ND<0.020          | 14.7                   | ND<0.020      | ND         |
| VD2-20                                                                                                                                                                                                                                                                                                                                                                                                                                                                                                                                                                                                                                                                                                                                 | 10/16/2007            | 20               | ND<0.020             | ND<0.020   | ND<0.020             | ND<0.020                | ND<0.020                  | ND<0.020           | ND<0.020             | ND<0.020                 | ND<0.020  | 9.17                | ND<0.020 | ND<0.020              | ND<0.020          | ND<0.020               | ND<0.020      | ND         |
| VD2-30                                                                                                                                                                                                                                                                                                                                                                                                                                                                                                                                                                                                                                                                                                                                 | 10/16/2007            | 30               | 0.475                | ND<0.020   | ND<0.020             | 0.441                   | ND<0.020                  | ND<0.020           | ND<0.020             | ND<0.020                 | 1.07      | 38.3                | ND<0.020 | ND<0.020              | ND<0.020          | 0.082                  | ND<0.020      | ND         |
| VD2-30/QC2-SV**                                                                                                                                                                                                                                                                                                                                                                                                                                                                                                                                                                                                                                                                                                                        | 10/16/2007            | 30               | ND<0.020             | ND<0.020   | ND<0.020             | ND<0.020                | 2.03                      | ND<0.020           | ND<0.020             | ND<0.020                 | 1.17      | 122                 | ND<0.020 | ND<0.020              | ND<0.020          | ND<0.020               | ND<0.020      | ND         |
| VD3-20                                                                                                                                                                                                                                                                                                                                                                                                                                                                                                                                                                                                                                                                                                                                 | 10/17/2007            | 20               | 1.45                 | ND<0.020   | ND<0.020             | 0.106                   | ND<0.020                  | ND<0.020           | ND<0.020             | ND<0.020                 | 0.086     | 3.37                | ND<0.020 | ND<0.020              | ND<0.020          | ND<0.020               | ND<0.020      | ND         |
| VD3-30                                                                                                                                                                                                                                                                                                                                                                                                                                                                                                                                                                                                                                                                                                                                 | 10/17/2007            | 30               | 1.42                 | ND<0.020   | ND<0.020             | 0.394                   | ND<0.020                  | ND<0.020           | ND<0.020             | ND<0.020                 | 0.374     | 5.63                | ND<0.020 | ND<0.020              | ND<0.020          | 0.364                  | ND<0.020      | ND         |
| VD3-30/QC3-SV**                                                                                                                                                                                                                                                                                                                                                                                                                                                                                                                                                                                                                                                                                                                        | 10/17/2007            | 30               | ND<0.020             | ND<0.020   | ND<0.020             | ND<0.020                | ND<0.020                  | ND<0.020           | ND<0.020             | ND<0.020                 | ND<0.020  | 1.33                | ND<0.020 | ND<0.020              | ND<0.020          | ND<0.020               | ND<0.020      | ND         |
| NMSD1-45                                                                                                                                                                                                                                                                                                                                                                                                                                                                                                                                                                                                                                                                                                                               | 10/18/2007            | 45               | 0.466                | ND<0.020   | ND<0.020             | ND<0.020                | ND<0.020                  | ND<0.020           | ND<0.020             | ND<0.020                 | ND<0.020  | 4.04                | ND<0.020 | ND<0.020              | ND<0.020          | ND<0.020               | ND<0.020      | ND         |
| NMSD1-70                                                                                                                                                                                                                                                                                                                                                                                                                                                                                                                                                                                                                                                                                                                               | 10/18/2007            | 70               | ND<0.020             | 0.243      | ND<0.020             | 1.52                    | ND<0.020                  | ND<0.020           | ND<0.020             | ND<0.020                 | ND<0.020  | 1.46                | ND<0.020 | ND<0.020              | ND<0.020          | 1.36                   | ND<0.020      | ND         |
| NMSD1-85                                                                                                                                                                                                                                                                                                                                                                                                                                                                                                                                                                                                                                                                                                                               | 10/18/2007            | 85               | 7.53                 | ND<0.020   | ND<0.020             | 1.09                    | ND<0.020                  | ND<0.020           | ND<0.020             | ND<0.020                 | 1.43      | 1.59                | ND<0.020 | ND<0.020              | ND<0.020          | 1.10                   | ND<0.020      | ND         |
| NMSD1-99                                                                                                                                                                                                                                                                                                                                                                                                                                                                                                                                                                                                                                                                                                                               | 10/18/2007            | 99               | ND<0.020             | 0.372      | ND<0.020             | ND<0.020                | ND<0.020                  | ND<0.020           | ND<0.020             | ND<0.020                 | 2.41      | 0.886               | ND<0.020 | ND<0.020              | ND<0.020          | 1.39                   | ND<0.020      | ND         |
| NMSD1-99/QC5-SV                                                                                                                                                                                                                                                                                                                                                                                                                                                                                                                                                                                                                                                                                                                        | 10/18/2007            | 99               | 5.95                 | ND<0.020   | ND<0.020             | 9.32                    | ND<0.020                  | ND<0.020           | ND<0.020             | ND<0.020                 | 1.49      | 0.407               | ND<0.020 | ND<0.020              | ND<0.020          | 1.06                   | ND<0.020      | ND         |
| NMSD2-63                                                                                                                                                                                                                                                                                                                                                                                                                                                                                                                                                                                                                                                                                                                               | 10/26/2007            | 63               | 2.57                 | ND<0.020   | ND<0.020             | 1.63                    | ND<0.020                  | ND<0.020           | ND<0.020             | ND<0.020                 | 8.68      | 0.348               | ND<0.020 | ND<0.020              | 0.047             | 0.611                  | ND<0.020      | ND         |
| NMSD2-63 DUP                                                                                                                                                                                                                                                                                                                                                                                                                                                                                                                                                                                                                                                                                                                           | 10/26/2007            | 63               | 2.67                 | ND<0.020   | ND<0.020             | 1.78                    | ND<0.020                  | ND<0.020           | ND<0.020             | ND<0.020                 | 9.29      | 0.346               | ND<0.020 | ND<0.020              | 0.036             | ND<0.020               | ND<0.020      | ND         |
| NMSD2-92                                                                                                                                                                                                                                                                                                                                                                                                                                                                                                                                                                                                                                                                                                                               | 10/26/2007            | 92               | 7.20                 | ND<0.020   | ND<0.020             | 2.50                    | ND<0.020                  | ND<0.020           | ND<0.020             | ND<0.020                 | 14.9      | 0.454               | ND<0.020 | ND<0.020              | 0.091             | ND<0.020               | ND<0.020      | ND         |
| NMSD2-130                                                                                                                                                                                                                                                                                                                                                                                                                                                                                                                                                                                                                                                                                                                              | 10/26/2007            | 130              | 12.9                 | ND<0.020   | ND<0.020             | 2.66                    | ND<0.020                  | ND<0.020           | 0.062                | ND<0.020                 | 16.5      | 1.43                | ND<0.020 | ND<0.020              | 0.288             | ND<0.020               | ND<0.020      | ND         |
| NMSD2-150                                                                                                                                                                                                                                                                                                                                                                                                                                                                                                                                                                                                                                                                                                                              | 10/26/2007            | 150              | 13.2                 | ND<0.020   | ND<0.020             | 2.53                    | ND<0.020                  | ND<0.020           | 0.251                | ND<0.020                 | 14.8      | 1.98                | ND<0.020 | ND<0.020              | 0.384             | ND<0.020               | ND<0.020      | ND         |
| NMSD2-150/QC6-SV                                                                                                                                                                                                                                                                                                                                                                                                                                                                                                                                                                                                                                                                                                                       | 10/26/2007            | 150              | 9.83                 | ND<0.020   | ND<0.020             | 1.41                    | ND<0.020                  | ND<0.020           | 0.650                | ND<0.020                 | 17.6      | 1.84                | ND<0.020 | ND<0.020              | 0.496             | ND<0.020               | ND<0.020      | ND         |
| NMSD3-60                                                                                                                                                                                                                                                                                                                                                                                                                                                                                                                                                                                                                                                                                                                               | 10/26/2007            | 60               | 8.39                 | 0.339      | ND<0.020             | 1.56                    | ND<0.020                  | 0.232              | 0.728                | 0.060                    | 6.96      | 22.3                | ND<0.020 | ND<0.020              | 2.39              | ND<0.020               | ND<0.020      | ND         |
| NMSD3-60/QC7-SV                                                                                                                                                                                                                                                                                                                                                                                                                                                                                                                                                                                                                                                                                                                        | 10/26/2007            | 60               | 7.18                 | 0.340      | ND<0.020             | 1.11                    | ND<0.020                  | 0.311              | 0.552                | 0.184                    | 9.18      | 15.6                | ND<0.020 | ND<0.020              | 1.52              | ND<0.020               | ND<0.020      | ND         |
| NMSD3-84                                                                                                                                                                                                                                                                                                                                                                                                                                                                                                                                                                                                                                                                                                                               | 10/26/2007            | 84               | 24.3                 | 0.724      | ND<0.020             | 2.62                    | ND<0.020                  | 0.940              | 1.85                 | 1.23                     | 13.0      | 22.2                | ND<0.020 | ND<0.020              | 6.99              | ND<0.020               | ND<0.020      | ND         |
| NMSD3-113                                                                                                                                                                                                                                                                                                                                                                                                                                                                                                                                                                                                                                                                                                                              | 10/26/2007            | 113              | 28.4                 | 1.12       | ND<0.020             | 2.89                    | ND<0.020                  | 1.56               | 2.66                 | 2.53                     | 14.9      | 17.9                | ND<0.020 | ND<0.020              | 8.59              | ND<0.020               | ND<0.020      | ND         |
| NMSD3-150                                                                                                                                                                                                                                                                                                                                                                                                                                                                                                                                                                                                                                                                                                                              | 10/26/2007            | 150              | 20.6                 | 0.728      | ND<0.020             | 1.63                    | ND<0.020                  | 0.833              | 1.7                  | 0.873                    | 8.72      | 14.6                | ND<0.020 | ND<0.020              | 2.92              | ND<0.020               | ND<0.020      | ND         |
| NMSD3-150/QC8-SV                                                                                                                                                                                                                                                                                                                                                                                                                                                                                                                                                                                                                                                                                                                       | 10/26/2007            | 150              | 18.5                 | 0.561      | ND<0.020             | 1.06                    | ND<0.020                  | 0.580              | 1.95                 | 0.642                    | 12.2      | 11.8                | ND<0.020 | ND<0.020              | 1.83              | ND<0.020               | ND<0.020      | ND         |
| Maximum Value (ug/l)                                                                                                                                                                                                                                                                                                                                                                                                                                                                                                                                                                                                                                                                                                                   |                       |                  | 28.4                 | 1.12       | .998                 | 9.32                    | 4.01                      | 1.56               | 1.95                 | 2.53                     | 17.6      | 342.00              | .244     | .063                  | 8.59              | 14.70                  | .718          | --         |
| Site Screening Values (µg/l)                                                                                                                                                                                                                                                                                                                                                                                                                                                                                                                                                                                                                                                                                                           |                       |                  | 0.000067             | 0.00012    | 0.00013              | 0.10                    | --                        | 0.0018             | 0.073                | 0.0083                   | 31.00     | 0.00046             | 0.31     | 1.00                  | 0.00048           | 1.30                   | 0.10          | --         |
| Site Screening Values Source                                                                                                                                                                                                                                                                                                                                                                                                                                                                                                                                                                                                                                                                                                           |                       |                  | DTSC                 | EPA        | DTSC                 | EPA                     | --                        | EPA                | DTSC                 | DTSC                     | EPA       | DTSC                | DTSC     | DTSC                  | EPA               | DTSC                   | EPA           | --         |
| <b>Notes:</b><br>indicates exceedance of the regulatory screening criteria<br>*Dilutions for these compounds<br>**Quality Assurance/Quality Control Samples collected in metal 1 liter SUMMA Canisters and analyzed by EPA Method TO-15<br>-- Not applicable<br>bgs – below ground surface<br>DTSC – Department of Toxic Substances Control<br>DUP – Duplicate sample<br>EPA – United States Environmental Protection Agency<br>ID - identification<br>µg/l – micrograms per liter<br>ND<0.020 – Non detect and below listed detection limit<br>Site Screening Value Source – EPA Residential Regional Screening Levels (RSLs) or DTSC Screening Levels for Residential Ambient Air (HHRA Note 3)<br>VOCs – Volatile Organic Compounds |                       |                  |                      |            |                      |                         |                           |                    |                      |                          |           |                     |          |                       |                   |                        |               |            |

**Table S2.** Summary of Detected Volatile Organic Compounds in Soil Vapor Samples at Former Santa Fe Railyard, Boyle Heights, CA [79], Table 2.

| <p>Table 2<br/>Summary of Detected Volatile Organic Compounds in Soil Vapor Samples<br/>Test Method EPA 8260SV (Modified EPA 8260B)<br/>Crown Coach<br/>2425 and 2455 East Washington Boulevard, Los Angeles, California</p> |                        |                  |                     |                                   |                    |            |            |                        |                   |                 |                                   |                 |
|------------------------------------------------------------------------------------------------------------------------------------------------------------------------------------------------------------------------------|------------------------|------------------|---------------------|-----------------------------------|--------------------|------------|------------|------------------------|-------------------|-----------------|-----------------------------------|-----------------|
| H&P 8260 SV                                                                                                                                                                                                                  |                        |                  |                     |                                   |                    |            |            |                        |                   |                 |                                   |                 |
| Location                                                                                                                                                                                                                     | Field Sample ID        | Depth (feet bgs) | Date                | Volatile Organic Compounds (µg/L) |                    |            |            |                        |                   |                 | 2013 Depth Specific Cleanup Goals |                 |
|                                                                                                                                                                                                                              |                        |                  |                     | 1,1,1-Trichloroethane             | 1,1-Dichloroethane | Benzene    | Chloroform | cis-1,2-Dichloroethane | Tetrachloroethane | Trichloroethane | Tetrachloroethane                 | Trichloroethane |
|                                                                                                                                                                                                                              |                        |                  |                     | 71-55-6                           | 75-35-4            | 71-43-2    | 67-66-3    | 156-59-2               | 127-18-4          | 79-01-6         | 127-18-4                          | 79-01-6         |
| CC-SV-01-15                                                                                                                                                                                                                  | CC-SV-01-15', P33359cc | 15               | 02/11/2013 12:48:00 | ND (<0.20)                        | ND (<0.20)         | ND (<0.04) | ND (<0.04) | ND (<0.20)             | 1.5               | ND (<0.04)      | 71                                | 19              |
|                                                                                                                                                                                                                              | CC-SV-01               |                  | 09/29/2014 12:43:00 | ND (<0.50)                        | ND (<0.50)         | ND (<0.10) | ND (<0.10) | ND (<0.50)             | 2.2               | 0.10            |                                   |                 |
|                                                                                                                                                                                                                              | CC-SV-01-15            |                  | 11/03/2015 12:49:00 | ND (<0.50)                        | ND (<0.50)         | ND (<0.10) | ND (<0.10) | ND (<0.50)             | 3.2               | ND (<0.10)      |                                   |                 |
|                                                                                                                                                                                                                              | CC-SV-01-15            |                  | 08/02/2016 08:29:00 | ND (<0.50)                        | ND (<0.50)         | ND (<0.10) | ND (<0.10) | ND (<0.50)             | 0.58              | ND (<0.10)      |                                   |                 |
|                                                                                                                                                                                                                              | CC-SV-01-15            |                  | 03/09/2017 07:30:00 | ND (<0.50)                        | ND (<0.50)         | ND (<0.10) | ND (<0.10) | ND (<0.50)             | 1.8               | ND (<0.10)      |                                   |                 |
| CC-SV-02-15                                                                                                                                                                                                                  | CC-SV-02-15', P33359cc | 15               | 02/13/2013 10:26:00 | ND (<0.20)                        | ND (<0.20)         | ND (<0.04) | ND (<0.04) | ND (<0.20)             | 7.6               | 0.35            | 71                                | 19              |
|                                                                                                                                                                                                                              | CC-SV-02               |                  | 09/29/2014 11:00:00 | ND (<0.50)                        | ND (<0.50)         | ND (<0.10) | ND (<0.10) | ND (<0.50)             | 12                | 0.37            |                                   |                 |
|                                                                                                                                                                                                                              | CC-SV-02-15'           |                  | 10/03/2014 07:37:00 | ND (<0.50)                        | ND (<0.50)         | 0.11       | ND (<0.10) | ND (<0.50)             | 7.6               | 1.1             |                                   |                 |
|                                                                                                                                                                                                                              | CC-SV-02-15            |                  | 11/03/2015 09:02:00 | ND (<0.50)                        | ND (<0.50)         | ND (<0.10) | ND (<0.10) | ND (<0.50)             | 5.8               | 1.0             |                                   |                 |
|                                                                                                                                                                                                                              | CC-SV-02-15            |                  | 08/01/2016 07:43:00 | ND (<0.50)                        | ND (<0.50)         | ND (<0.10) | ND (<0.10) | ND (<0.50)             | 1.5               | ND (<0.10)      |                                   |                 |
|                                                                                                                                                                                                                              | CC-SV-02-15            |                  | 03/07/2017 08:40:00 | ND (<0.50)                        | ND (<0.50)         | ND (<0.10) | ND (<0.10) | ND (<0.50)             | 1.2               | ND (<0.10)      |                                   |                 |
| CC-SV-02-45                                                                                                                                                                                                                  | CC-SV-02-45', P33741cc | 45               | 02/13/2013 10:46:00 | ND (<0.20)                        | ND (<0.20)         | ND (<0.04) | ND (<0.04) | ND (<0.20)             | 20                | 2.0             | 181                               | 48              |
|                                                                                                                                                                                                                              | CC-SV-02-45            |                  | 11/03/2015 09:17:00 | ND (<0.50)                        | ND (<0.50)         | ND (<0.10) | ND (<0.10) | ND (<0.50)             | 14                | 0.33            |                                   |                 |
|                                                                                                                                                                                                                              | CC-SV-02-45 REP        |                  | 11/03/2015 09:23:00 | ND (<0.50)                        | ND (<0.50)         | ND (<0.10) | ND (<0.10) | ND (<0.50)             | 9.6               | 0.31            |                                   |                 |
|                                                                                                                                                                                                                              | CC-SV-02-45            |                  | 08/03/2016 09:10:00 | ND (<0.50)                        | ND (<0.50)         | ND (<0.10) | ND (<0.10) | ND (<0.50)             | 2.6               | ND (<0.10)      |                                   |                 |
|                                                                                                                                                                                                                              | CC-SV-02-45            |                  | 03/07/2017 08:48:00 | ND (<0.50)                        | ND (<0.50)         | ND (<0.10) | ND (<0.10) | ND (<0.50)             | 5.7               | 0.20            |                                   |                 |
| CC-SV-02-84                                                                                                                                                                                                                  | CC-SV-02-84', P34117cc | 84               | 02/13/2013 11:10:00 | ND (<0.20)                        | 3.3                | ND (<0.04) | 0.10       | ND (<0.20)             | 82                | 17              | 324                               | 85              |
|                                                                                                                                                                                                                              | CC-SV-02-84'           |                  | 10/03/2014 07:44:00 | ND (<0.50)                        | ND (<0.50)         | 0.12       | ND (<0.10) | ND (<0.50)             | 13                | 1.2             |                                   |                 |
|                                                                                                                                                                                                                              | CC-SV-02-84            |                  | 11/03/2015 09:33:00 | ND (<0.50)                        | ND (<0.50)         | ND (<0.10) | ND (<0.10) | ND (<0.50)             | 13                | 0.79            |                                   |                 |
|                                                                                                                                                                                                                              | CC-SV-02-84            |                  | 08/01/2016 07:47:00 | ND (<0.50)                        | ND (<0.50)         | ND (<0.10) | ND (<0.10) | ND (<0.50)             | 1.8               | 0.10            |                                   |                 |
|                                                                                                                                                                                                                              | CC-SV-02-84 rep        |                  | 08/01/2016 07:47:00 | ND (<0.50)                        | ND (<0.50)         | ND (<0.10) | ND (<0.10) | ND (<0.50)             | 1.6               | 0.12            |                                   |                 |
|                                                                                                                                                                                                                              | CC-SV-02-84            |                  | 03/07/2017 08:53:00 | ND (<0.50)                        | ND (<0.50)         | ND (<0.10) | ND (<0.10) | ND (<0.50)             | 4.1               | 0.16            |                                   |                 |
| CC-SV-03-15                                                                                                                                                                                                                  | CC-SV-03-15', P33359cc | 15               | 02/12/2013 07:25:00 | ND (<0.20)                        | ND (<0.20)         | ND (<0.04) | ND (<0.04) | ND (<0.20)             | 1.7               | ND (<0.04)      | 71                                | 19              |
|                                                                                                                                                                                                                              | CC-SV-03               |                  | 09/29/2014 09:05:00 | ND (<0.50)                        | ND (<0.50)         | ND (<0.10) | ND (<0.10) | ND (<0.50)             | 7.4               | 0.11            |                                   |                 |
|                                                                                                                                                                                                                              | CC-SV-03-15            |                  | 10/13/2014 08:16:00 | ND (<0.50)                        | ND (<0.50)         | ND (<0.10) | ND (<0.10) | ND (<0.50)             | 4.7               | 0.16            |                                   |                 |
|                                                                                                                                                                                                                              | CC-SV-03-15            |                  | 11/03/2015 11:14:00 | ND (<0.50)                        | ND (<0.50)         | ND (<0.10) | ND (<0.10) | ND (<0.50)             | 8.9               | 0.24            |                                   |                 |

**Table S2.** Summary of Detected Volatile Organic Compounds in Soil Vapor Samples at Former Santa Fe Railyard, Boyle Heights, CA [79], Table 2.

|               |                        |    |                     |            |             |             |            |             |            |             |     |    |
|---------------|------------------------|----|---------------------|------------|-------------|-------------|------------|-------------|------------|-------------|-----|----|
|               | CC-SV-03-15            |    | 08/02/2016 07:46:00 | ND (<0.50) | ND (<0.50)  | ND (<0.10)  | ND (<0.10) | ND (<0.50)  | <b>6.7</b> | <b>0.25</b> |     |    |
|               | CC-SV-03-15            |    | 03/08/2017 12:36:00 | ND (<0.50) | ND (<0.50)  | <b>0.10</b> | ND (<0.10) | ND (<0.50)  | <b>7.9</b> | <b>0.25</b> |     |    |
| CC-SV-03-40   | CC-SV-03-40', P33722cc | 40 | 02/12/2013 07:45:00 | ND (<0.20) | ND (<0.20)  | ND (<0.04)  | ND (<0.04) | ND (<0.20)  | <b>3.1</b> | ND (<0.04)  | 162 | 43 |
|               | CC-SV-03-40            |    | 11/03/2015 11:25:00 | ND (<0.50) | ND (<0.50)  | ND (<0.10)  | ND (<0.10) | ND (<0.50)  | <b>7.5</b> | <b>0.13</b> |     |    |
|               | CC-SV-03-40            |    | 08/02/2016 07:54:00 | ND (<0.50) | ND (<0.50)  | ND (<0.10)  | ND (<0.10) | ND (<0.50)  | <b>4.4</b> | <b>0.13</b> |     |    |
|               | CC-SV-03-40            |    | 03/08/2017 12:44:00 | ND (<0.50) | ND (<0.50)  | ND (<0.10)  | ND (<0.10) | ND (<0.50)  | <b>9.8</b> | <b>0.29</b> |     |    |
|               | CC-SV-03-40            |    |                     |            |             |             |            |             |            |             |     |    |
| CC-SV-03-57   | CC-SV-03-57', P33905c  | 57 | 02/12/2013 08:05:00 | ND (<0.20) | ND (<0.20)  | ND (<0.04)  | ND (<0.04) | ND (<0.20)  | <b>1.9</b> | ND (<0.04)  | 225 | 60 |
|               | CC-SV-03-57            |    | 10/13/2014 08:28:00 | ND (<0.50) | ND (<0.50)  | ND (<0.10)  | ND (<0.10) | ND (<0.50)  | <b>9.7</b> | <b>0.22</b> |     |    |
|               | CC-SV-03-57            |    | 11/03/2015 11:46:00 | ND (<0.50) | ND (<0.50)  | ND (<0.10)  | ND (<0.10) | ND (<0.50)  | <b>12</b>  | <b>0.19</b> |     |    |
|               | CC-SV-03-57            |    | 08/02/2016 08:00:00 | ND (<0.50) | ND (<0.50)  | ND (<0.10)  | ND (<0.10) | ND (<0.50)  | <b>2.1</b> | ND (<0.10)  |     |    |
|               | CC-SV-03-57            |    | 03/08/2017 13:01:00 | ND (<0.50) | ND (<0.50)  | ND (<0.10)  | ND (<0.10) | ND (<0.50)  | <b>4.7</b> | <b>0.12</b> |     |    |
| CC-SV-04R-15  | CC-SV-04-15', P33359cc | 15 | 02/13/2013 11:30:00 | ND (<0.20) | ND (<0.20)  | ND (<0.04)  | ND (<0.04) | ND (<0.20)  | <b>4.6</b> | <b>0.42</b> | 71  | 19 |
|               | CC-SV-04R-15           |    | 11/02/2015 09:53:00 | ND (<0.50) | ND (<0.50)  | ND (<0.10)  | ND (<0.10) | ND (<0.50)  | <b>12</b>  | <b>0.95</b> |     |    |
|               | CC-SV-04R-15 REP       |    | 11/02/2015 09:54:00 | ND (<0.50) | ND (<0.50)  | ND (<0.10)  | ND (<0.10) | ND (<0.50)  | <b>13</b>  | <b>1.0</b>  |     |    |
|               | CC-SV-04R-15           |    | 08/01/2016 10:02:00 | ND (<0.50) | ND (<0.50)  | ND (<0.10)  | ND (<0.10) | ND (<0.50)  | <b>5.7</b> | <b>0.61</b> |     |    |
|               | CC-SV-04R-15           |    | 03/07/2017 10:16:00 | ND (<0.50) | ND (<0.50)  | ND (<0.10)  | ND (<0.10) | ND (<0.50)  | <b>3.1</b> | <b>0.28</b> |     |    |
| CC-SV-04R-40  | CC-SV-04-40', P33722cc | 40 | 02/13/2013 11:50:00 | ND (<0.20) | <b>0.70</b> | ND (<0.04)  | ND (<0.04) | ND (<0.20)  | <b>22</b>  | <b>2.5</b>  | 162 | 43 |
|               | CC-SV-04R-40           |    | 11/02/2015 10:05:00 | ND (<0.50) | ND (<0.50)  | ND (<0.10)  | ND (<0.10) | ND (<0.50)  | <b>28</b>  | <b>2.6</b>  |     |    |
|               | CC-SV-04R-40           |    | 08/01/2016 10:10:00 | ND (<0.50) | ND (<0.50)  | ND (<0.10)  | ND (<0.10) | ND (<0.50)  | <b>5.4</b> | <b>0.32</b> |     |    |
|               | CC-SV-04R-40           |    | 03/07/2017 10:25:00 | ND (<0.50) | ND (<0.50)  | ND (<0.10)  | ND (<0.10) | ND (<0.50)  | <b>7.3</b> | <b>1.2</b>  |     |    |
| CC-SV-04R-62  | CC-SV-04-60', P34007cc | 60 | 02/13/2013 12:10:00 | ND (<0.20) | <b>0.99</b> | ND (<0.04)  | ND (<0.04) | ND (<0.20)  | <b>39</b>  | <b>4.2</b>  | 236 | 63 |
|               | CC-SV-04R-62           | 62 | 11/02/2015 10:20:00 | ND (<0.50) | ND (<0.50)  | ND (<0.10)  | ND (<0.10) | ND (<0.50)  | <b>25</b>  | <b>2.2</b>  | 243 | 65 |
|               | CC-SV-04R-62R          |    | 11/03/2015 10:06:00 | ND (<0.50) | ND (<0.50)  | ND (<0.10)  | ND (<0.10) | ND (<0.50)  | <b>31</b>  | <b>2.6</b>  |     |    |
|               | CC-SV-04R-62           |    | 08/01/2016 10:14:00 | ND (<0.50) | ND (<0.50)  | ND (<0.10)  | ND (<0.10) | ND (<0.50)  | <b>4.1</b> | <b>0.11</b> |     |    |
|               | CC-SV-04R-62           |    | 03/07/2017 10:37:00 | ND (<0.50) | ND (<0.50)  | ND (<0.10)  | ND (<0.10) | ND (<0.50)  | <b>3.3</b> | <b>0.17</b> |     |    |
| CC-SV-05-15   | CC-SV-05-15', P33359cc | 15 | 02/11/2013 10:52:00 | ND (<0.20) | ND (<0.20)  | ND (<0.04)  | ND (<0.04) | ND (<0.20)  | <b>7.4</b> | <b>0.76</b> | 71  | 19 |
|               | CC-SV-05               |    | 09/29/2014 09:22:00 | ND (<0.50) | ND (<0.50)  | ND (<0.10)  | ND (<0.10) | ND (<0.50)  | <b>15</b>  | <b>1.1</b>  |     |    |
|               | CC-SV-05-15            |    | 10/13/2014 08:57:00 | ND (<0.50) | ND (<0.50)  | ND (<0.10)  | ND (<0.10) | ND (<0.50)  | <b>5.7</b> | <b>0.48</b> |     |    |
|               | CC-SV-05-15            |    | 11/02/2015 13:10:00 | ND (<0.50) | ND (<0.50)  | ND (<0.10)  | ND (<0.10) | ND (<0.50)  | <b>15</b>  | <b>0.96</b> |     |    |
|               | CC-SV-05-15            |    | 08/01/2016 12:54:00 | ND (<0.50) | ND (<0.50)  | ND (<0.10)  | ND (<0.10) | ND (<0.50)  | <b>5.9</b> | <b>0.43</b> |     |    |
|               | CC-SV-05-15            |    | 03/07/2017 13:43:00 | ND (<0.50) | ND (<0.50)  | ND (<0.10)  | ND (<0.10) | ND (<0.50)  | <b>3.6</b> | <b>0.20</b> |     |    |
| CC-SV-05-40   | CC-SV-05-40', P33722cc | 40 | 02/11/2013 11:13:00 | ND (<0.20) | ND (<0.20)  | ND (<0.04)  | ND (<0.04) | ND (<0.20)  | <b>13</b>  | <b>1.3</b>  | 162 | 43 |
|               | CC-SV-05-40            |    | 11/02/2015 13:22:00 | ND (<0.50) | ND (<0.50)  | ND (<0.10)  | ND (<0.10) | ND (<0.50)  | <b>10</b>  | <b>0.56</b> |     |    |
|               | CC-SV-05-40            |    | 08/01/2016 12:27:00 | ND (<0.50) | ND (<0.50)  | ND (<0.10)  | ND (<0.10) | ND (<0.50)  | <b>1.8</b> | ND (<0.10)  |     |    |
|               | CC-SV-05-40            |    | 03/07/2017 12:58:00 | ND (<0.50) | ND (<0.50)  | ND (<0.10)  | ND (<0.10) | ND (<0.50)  | <b>2.9</b> | ND (<0.10)  |     |    |
| CC-SV-05-59   | CC-SV-05-59', P34003cc | 59 | 02/11/2013 11:34:00 | ND (<0.20) | ND (<0.20)  | ND (<0.04)  | ND (<0.04) | ND (<0.20)  | <b>15</b>  | <b>0.83</b> | 233 | 62 |
|               | CC-SV-05-59            |    | 10/13/2014 09:17:00 | ND (<0.50) | <b>0.89</b> | ND (<0.10)  | ND (<0.10) | <b>0.80</b> | <b>190</b> | <b>9.2</b>  |     |    |
| CC-SV-05DR-57 | CC-SV-05DR-57          | 57 | 11/02/2015 13:51:00 | ND (<0.50) | ND (<0.50)  | ND (<0.10)  | ND (<0.10) | ND (<0.50)  | <b>25</b>  | <b>1.2</b>  | 224 | 61 |

**Table S2.** Summary of Detected Volatile Organic Compounds in Soil Vapor Samples at Former Santa Fe Railyard, Boyle Heights, CA [79], Table 2.

|                 |                            |    |                     |            |             |             |             |            |            |             |     |    |
|-----------------|----------------------------|----|---------------------|------------|-------------|-------------|-------------|------------|------------|-------------|-----|----|
|                 | CC-SV-05DR-57              |    | 08/01/2016 12:37:00 | ND (<0.50) | ND (<0.50)  | ND (<0.10)  | ND (<0.10)  | ND (<0.50) | <b>3.0</b> | ND (<0.10)  |     |    |
|                 | CC-SV-05DR-57              |    | 03/07/2017 13:20:00 | ND (<0.50) | ND (<0.50)  | ND (<0.10)  | ND (<0.10)  | ND (<0.50) | <b>6.4</b> | <b>0.20</b> |     |    |
| CC-SV-06-15     | CC-SV-06-15', P33359cc     | 15 | 02/13/2013 08:20:00 | ND (<0.20) | ND (<0.20)  | ND (<0.04)  | ND (<0.04)  | ND (<0.20) | <b>7.9</b> | <b>0.86</b> | 71  | 19 |
|                 | CC-SV-06                   |    | 09/29/2014 11:14:00 | ND (<0.50) | ND (<0.50)  | ND (<0.10)  | ND (<0.10)  | ND (<0.50) | <b>19</b>  | <b>2.4</b>  |     |    |
|                 | CC-SV-06-15'               |    | 10/03/2014 07:57:00 | ND (<0.50) | ND (<0.50)  | <b>0.18</b> | ND (<0.10)  | ND (<0.50) | <b>10</b>  | <b>0.83</b> |     |    |
|                 |                            |    |                     | <b>NA</b>  | <b>NA</b>   | <b>NA</b>   | <b>NA</b>   | <b>NA</b>  | <b>NA</b>  | <b>NA</b>   |     |    |
|                 |                            |    |                     |            |             |             |             |            |            |             |     |    |
| CC-SV-06SMR-15  | CC-SV-06SMR-15             | 15 | 11/02/2015 08:33:00 | ND (<0.50) | ND (<0.50)  | ND (<0.10)  | ND (<0.10)  | ND (<0.50) | <b>19</b>  | <b>1.2</b>  | 71  | 19 |
|                 | CC-SV-06SMR-15             |    | 08/01/2016 08:40:00 | ND (<0.50) | ND (<0.50)  | ND (<0.10)  | ND (<0.10)  | ND (<0.50) | <b>5.0</b> | <b>0.33</b> |     |    |
|                 | CC-SV-06SMR-15             |    | 03/07/2017 08:34:00 | ND (<0.50) | ND (<0.50)  | ND (<0.10)  | ND (<0.10)  | ND (<0.50) | <b>2.7</b> | <b>0.17</b> |     |    |
| CC-SV-06-SMR-40 | CC-SV-06-40', P33722cc     | 40 | 02/13/2013 08:41:00 | ND (<0.20) | <b>1.1</b>  | ND (<0.04)  | ND (<0.04)  | ND (<0.20) | <b>30</b>  | <b>4.6</b>  | 162 | 43 |
|                 | CC-SV-06SMR-40             |    | 11/02/2015 08:45:00 | ND (<0.50) | ND (<0.50)  | ND (<0.10)  | ND (<0.10)  | ND (<0.50) | <b>26</b>  | <b>2.5</b>  |     |    |
|                 | CC-SV-06SMR-40             |    | 08/01/2016 08:37:00 | ND (<0.50) | ND (<0.50)  | ND (<0.10)  | ND (<0.10)  | ND (<0.50) | <b>6.0</b> | <b>0.29</b> |     |    |
|                 | CC-SV-06SMR-40             |    | 03/07/2017 08:08:00 | ND (<0.50) | ND (<0.50)  | ND (<0.10)  | ND (<0.10)  | ND (<0.50) | <b>9.6</b> | <b>0.59</b> |     |    |
|                 |                            |    |                     |            |             |             |             |            |            |             |     |    |
| CC-SV-06-64     | CC-SV-06-60' Rep, P34057cc | 60 | 02/13/2013 09:03:00 | ND (<0.20) | <b>2.3</b>  | ND (<0.04)  | ND (<0.04)  | ND (<0.20) | <b>60</b>  | <b>11</b>   | 236 | 63 |
|                 | CC-SV-06-60', P34007cc     |    | 02/13/2013 09:02:00 | ND (<0.20) | <b>1.5</b>  | ND (<0.04)  | ND (<0.04)  | ND (<0.20) | <b>38</b>  | <b>6.4</b>  |     |    |
|                 | CC-SV-06-64'               | 64 | 10/03/2014 08:02:00 | ND (<0.50) | ND (<0.50)  | <b>0.15</b> | ND (<0.10)  | ND (<0.50) | <b>26</b>  | <b>4.2</b>  | 249 | 67 |
|                 | CC-SV-06-64                |    | 11/02/2015 08:59:00 | ND (<0.50) | ND (<0.50)  | ND (<0.10)  | ND (<0.10)  | ND (<0.50) | <b>23</b>  | <b>2.8</b>  |     |    |
|                 | CC-SV-06-64R               |    | 11/03/2015 08:39:00 | ND (<0.50) | ND (<0.50)  | ND (<0.10)  | ND (<0.10)  | ND (<0.50) | <b>32</b>  | <b>3.8</b>  |     |    |
|                 | CC-SV-06-64                |    | 08/01/2016 08:22:00 | ND (<0.50) | ND (<0.50)  | ND (<0.10)  | <b>0.16</b> | ND (<0.50) | <b>5.3</b> | <b>0.33</b> |     |    |
|                 | CC-SV-06-64                |    | 03/07/2017 07:40:00 | ND (<0.50) | ND (<0.50)  | ND (<0.10)  | <b>0.10</b> | ND (<0.50) | <b>7.9</b> | <b>0.70</b> |     |    |
|                 | CC-SV-06-64 REP            |    | 03/07/2017 07:41:00 | ND (<0.50) | ND (<0.50)  | ND (<0.10)  | ND (<0.10)  | ND (<0.50) | <b>6.6</b> | <b>0.55</b> |     |    |
| CC-SV-07-15     | CC-SV-07-15', P33359cc     | 15 | 02/13/2013 07:19:00 | ND (<0.20) | ND (<0.20)  | ND (<0.04)  | ND (<0.04)  | ND (<0.20) | <b>8.1</b> | <b>0.73</b> | 71  | 19 |
|                 | CC-SV-07                   |    | 09/29/2014 10:25:00 | ND (<0.50) | ND (<0.50)  | ND (<0.10)  | ND (<0.10)  | ND (<0.50) | <b>14</b>  | <b>1.3</b>  |     |    |
|                 | CC-SV-07-15                |    | 11/03/2015 07:46:00 | ND (<0.50) | ND (<0.50)  | ND (<0.10)  | ND (<0.10)  | ND (<0.50) | <b>6.7</b> | <b>0.42</b> |     |    |
|                 | CC-SV-07-15                |    | 08/01/2016 09:06:00 | ND (<0.50) | ND (<0.50)  | ND (<0.10)  | ND (<0.10)  | ND (<0.50) | <b>2.9</b> | <b>0.36</b> |     |    |
|                 | CC-SV-07-15                |    | 03/07/2017 09:22:00 | ND (<0.50) | ND (<0.50)  | ND (<0.10)  | ND (<0.10)  | ND (<0.50) | <b>2.4</b> | <b>0.12</b> |     |    |
| CC-SV-07-40     | CC-SV-07-45', P33722cc     | 40 | 02/13/2013 07:39:00 | ND (<0.20) | <b>0.84</b> | ND (<0.04)  | ND (<0.04)  | ND (<0.20) | <b>32</b>  | <b>3.9</b>  | 162 | 43 |
|                 | CC-SV-07-B                 |    | 10/13/2014 10:53:00 | ND (<0.50) | ND (<0.50)  | ND (<0.10)  | ND (<0.10)  | ND (<0.50) | <b>28</b>  | <b>2.9</b>  |     |    |
|                 | CC-SV-07-40                |    | 11/03/2015 07:59:00 | ND (<0.50) | ND (<0.50)  | ND (<0.10)  | ND (<0.10)  | ND (<0.50) | <b>24</b>  | <b>1.9</b>  |     |    |
|                 | CC-SV-07-40                |    | 08/01/2016 09:18:00 | ND (<0.50) | ND (<0.50)  | ND (<0.10)  | ND (<0.10)  | ND (<0.50) | <b>2.2</b> | <b>0.17</b> |     |    |
|                 | CC-SV-07-40                |    | 03/07/2017 09:35:00 | ND (<0.50) | ND (<0.50)  | ND (<0.10)  | ND (<0.10)  | ND (<0.50) | <b>8.8</b> | <b>0.52</b> |     |    |
| CC-SV-07-60     | CC-SV-07-65.5', P34022cc   | 60 | 02/13/2013 08:00:00 | ND (<0.20) | <b>1.3</b>  | ND (<0.04)  | ND (<0.04)  | ND (<0.20) | <b>46</b>  | <b>5.5</b>  | 236 | 63 |
|                 | CC-SV-07-A                 |    | 10/13/2014 10:42:00 | ND (<0.50) | ND (<0.50)  | ND (<0.10)  | ND (<0.10)  | ND (<0.50) | <b>3.7</b> | <b>0.30</b> |     |    |
|                 | CC-SV-07-60                |    | 11/03/2015 08:12:00 | ND (<0.50) | ND (<0.50)  | ND (<0.10)  | ND (<0.10)  | ND (<0.50) | <b>30</b>  | <b>2.4</b>  |     |    |
|                 | CC-SV-07-60                |    | 08/01/2016 09:20:00 | ND (<0.50) | ND (<0.50)  | ND (<0.10)  | ND (<0.10)  | ND (<0.50) | <b>7.3</b> | <b>0.64</b> |     |    |
|                 | CC-SV-07-60                |    | 03/07/2017 09:48:00 | ND (<0.50) | ND (<0.50)  | ND (<0.10)  | ND (<0.10)  | ND (<0.50) | <b>11</b>  | <b>0.93</b> |     |    |
| CC-SV-08-15     | CC-SV-08-15', P33359cc     | 15 | 02/11/2013 10:27:00 | ND (<0.20) | ND (<0.20)  | ND (<0.04)  | ND (<0.04)  | ND (<0.20) | <b>6.1</b> | <b>0.45</b> | 71  | 19 |
|                 | CC-SV-08                   |    | 09/29/2014 12:16:00 | ND (<0.50) | <b>1.5</b>  | ND (<0.10)  | ND (<0.10)  | ND (<0.50) | <b>50</b>  | <b>5.7</b>  |     |    |

**Table S2.** Summary of Detected Volatile Organic Compounds in Soil Vapor Samples at Former Santa Fe Railyard, Boyle Heights, CA [79], Table 2.

|               |                               |      |                     |            |             |             |             |             |             |             |     |    |
|---------------|-------------------------------|------|---------------------|------------|-------------|-------------|-------------|-------------|-------------|-------------|-----|----|
|               | CC-SV-08-15                   |      | 10/13/2014 09:43:00 | ND (<0.50) | ND (<0.50)  | ND (<0.10)  | ND (<0.10)  | ND (<0.50)  | <b>9.6</b>  | <b>0.93</b> |     |    |
|               | CC-SV-08-15                   |      | 11/02/2015 10:46:00 | ND (<0.50) | <b>0.75</b> | ND (<0.10)  | ND (<0.10)  | ND (<0.50)  | <b>36</b>   | <b>3.2</b>  |     |    |
|               | CC-SV-08-15                   |      | 08/01/2016 11:51:00 | ND (<0.50) | ND (<0.50)  | ND (<0.10)  | ND (<0.10)  | ND (<0.50)  | <b>6.2</b>  | <b>0.56</b> |     |    |
|               | CC-SV-08-15                   |      | 03/07/2017 12:09:00 | ND (<0.50) | ND (<0.50)  | ND (<0.10)  | ND (<0.10)  | ND (<0.50)  | <b>4.4</b>  | <b>0.48</b> |     |    |
| CC-SV-08-40   | CC-SV-08-40', 10PV, P112407cc | 40   | 02/11/2013 08:01:00 | ND (<0.20) | <b>3.9</b>  | ND (<0.04)  | ND (<0.04)  | ND (<0.20)  | <b>70</b>   | <b>7.8</b>  | 162 | 43 |
|               | CC-SV-08-40', 1PV, P11241cc   |      | 02/11/2013 07:34:00 | ND (<0.20) | <b>3.7</b>  | ND (<0.04)  | ND (<0.04)  | ND (<0.20)  | <b>69</b>   | <b>7.8</b>  |     |    |
|               | CC-SV-08-40', 3PV, P33722cc   |      | 02/11/2013 07:38:00 | ND (<0.20) | <b>4.0</b>  | ND (<0.04)  | ND (<0.04)  | ND (<0.20)  | <b>77</b>   | <b>8.4</b>  |     |    |
|               | CC-SV-08-40                   |      | 11/02/2015 11:00:00 | ND (<0.50) | <b>2.8</b>  | ND (<0.10)  | ND (<0.10)  | ND (<0.50)  | <b>91</b>   | <b>10</b>   |     |    |
|               | CC-SV-08-40                   |      | 08/01/2016 12:00:00 | ND (<1.0)  | ND (<1.0)   | ND (<0.20)  | ND (<0.20)  | ND (<1.0)   | <b>3.5</b>  | ND (<0.20)  |     |    |
|               | CC-SV-08-40                   |      | 03/07/2017 12:19:00 | ND (<0.50) | <b>0.53</b> | ND (<0.10)  | ND (<0.10)  | ND (<0.50)  | <b>6.0</b>  | <b>0.51</b> |     |    |
| CC-SV-08-59.5 | CC-SV-08-59.5' Rep, P34055cc  | 59.5 | 02/11/2013 10:48:00 | ND (<0.20) | <b>8.4</b>  | ND (<0.04)  | ND (<0.04)  | ND (<0.20)  | <b>320</b>  | <b>17</b>   | 236 | 63 |
|               | CC-SV-08-59.5', P34005cc      |      | 02/11/2013 10:47:00 | ND (<0.20) | <b>7.0</b>  | ND (<0.04)  | ND (<0.04)  | ND (<0.20)  | <b>280</b>  | <b>14</b>   |     |    |
|               | CC-SV-08-59.5                 |      | 10/13/2014 09:57:00 | ND (<0.50) | <b>5.5</b>  | ND (<0.10)  | ND (<0.10)  | <b>0.59</b> | <b>210</b>  | <b>19</b>   |     |    |
|               | CC-SV-08-59.5-R               |      | 11/02/2015 14:23:00 | ND (<0.50) | <b>5.8</b>  | ND (<0.10)  | ND (<0.10)  | <b>0.75</b> | <b>250</b>  | <b>21</b>   |     |    |
|               | CC-SV-08-59.5-RR              |      | 11/03/2015 10:37:00 | ND (<0.50) | <b>6.9</b>  | <b>0.10</b> | ND (<0.10)  | <b>0.80</b> | <b>250</b>  | <b>25</b>   |     |    |
|               | CC-SV-08-59.5                 |      | 08/01/2016 12:02:00 | ND (<2.5)  | ND (<2.5)   | ND (<0.50)  | ND (<0.50)  | ND (<2.5)   | <b>56</b>   | <b>8.6</b>  |     |    |
|               | CC-SV-08-59.5                 |      | 03/07/2017 12:29:00 | ND (<0.50) | <b>1.0</b>  | ND (<0.10)  | ND (<0.10)  | ND (<0.50)  | <b>42</b>   | <b>6.6</b>  |     |    |
| CC-SV-09-15   | CC-SV-09-15', P33359cc        | 15   | 02/12/2013 09:45:00 | ND (<0.20) | ND (<0.20)  | ND (<0.04)  | ND (<0.04)  | ND (<0.20)  | <b>8.8</b>  | <b>1.2</b>  | 71  | 19 |
|               | CC-SV-09                      |      | 09/29/2014 11:58:00 | ND (<0.50) | ND (<0.50)  | ND (<0.10)  | ND (<0.10)  | ND (<0.50)  | <b>19</b>   | <b>3.1</b>  |     |    |
|               | CC-SV-09-15                   |      | 10/13/2014 11:18:00 | ND (<0.50) | ND (<0.50)  | ND (<0.10)  | ND (<0.10)  | ND (<0.50)  | <b>8.9</b>  | <b>1.6</b>  |     |    |
|               | CC-SV-09-15                   |      | 11/05/2015 08:49:00 | ND (<0.50) | ND (<0.50)  | ND (<0.10)  | ND (<0.10)  | ND (<0.50)  | <b>22</b>   | <b>3.5</b>  |     |    |
|               | CC-SV-9-15                    |      | 08/03/2016 07:59:00 | ND (<0.50) | ND (<0.50)  | ND (<0.10)  | ND (<0.10)  | ND (<0.50)  | <b>0.42</b> | ND (<0.10)  |     |    |
|               | CC-SV-09-15                   |      | 03/09/2017 09:04:00 | ND (<0.50) | ND (<0.50)  | ND (<0.10)  | ND (<0.10)  | ND (<0.50)  | <b>20</b>   | <b>3.6</b>  |     |    |
| CC-SV-09-45   | CC-SV-09-45', P33747cc        | 45   | 02/12/2013 10:04:00 | ND (<0.20) | <b>0.57</b> | ND (<0.04)  | ND (<0.04)  | ND (<0.20)  | <b>22</b>   | <b>2.7</b>  | 181 | 48 |
|               | CC-SV-09-45                   |      | 11/05/2015 09:00:00 | ND (<0.50) | ND (<0.50)  | ND (<0.10)  | ND (<0.10)  | ND (<0.50)  | <b>30</b>   | <b>4.3</b>  |     |    |
|               | CC-SV-9-45                    |      | 08/03/2016 08:22:00 | ND (<0.50) | ND (<0.50)  | ND (<0.10)  | ND (<0.10)  | ND (<0.50)  | <b>8.7</b>  | <b>0.90</b> |     |    |
|               | CC-SV-09-45                   |      | 03/09/2017 09:25:00 | ND (<0.50) | ND (<0.50)  | ND (<0.10)  | ND (<0.10)  | ND (<0.50)  | <b>15</b>   | <b>1.9</b>  |     |    |
|               | CC-SV-09-45 REP               |      | 03/09/2017 09:26:00 | ND (<0.50) | ND (<0.50)  | ND (<0.10)  | ND (<0.10)  | ND (<0.50)  | <b>15</b>   | <b>1.8</b>  |     |    |
| CC-SV-09-65.5 | CC-SV-09-65.5', P34022cc      | 65.5 | 02/12/2013 10:04:00 | ND (<0.20) | <b>0.86</b> | ND (<0.04)  | ND (<0.04)  | ND (<0.20)  | <b>31</b>   | <b>3.6</b>  | 254 | 68 |
|               | CC-SV-09-65.5                 |      | 10/13/2014 11:29:00 | ND (<0.50) | ND (<0.50)  | ND (<0.10)  | ND (<0.10)  | ND (<0.50)  | <b>24</b>   | <b>3.7</b>  |     |    |
|               | CC-SV-09-65.5                 |      | 11/04/2015 14:27:00 | ND (<0.50) | ND (<0.50)  | ND (<0.10)  | ND (<0.10)  | ND (<0.50)  | <b>28</b>   | <b>4.1</b>  |     |    |
|               | CC-SV-9-65.5                  |      | 08/03/2016 07:56:00 | ND (<0.50) | ND (<0.50)  | ND (<0.10)  | <b>0.17</b> | ND (<0.50)  | <b>6.9</b>  | <b>0.79</b> |     |    |
|               | CC-SV-09-65.5                 |      | 03/09/2017 09:43:00 | ND (<0.50) | ND (<0.50)  | ND (<0.10)  | <b>0.11</b> | ND (<0.50)  | <b>13</b>   | <b>1.6</b>  |     |    |
| CC-SV-10-15   | CC-SV-10-15', P33359c         | 15   | 02/12/2013 08:53:00 | ND (<0.20) | ND (<0.20)  | ND (<0.04)  | ND (<0.04)  | ND (<0.20)  | <b>0.95</b> | ND (<0.04)  | 71  | 19 |
| CC-SV-10R-15  | CC-SV-10R-15                  |      | 11/03/2015 13:15:00 | ND (<0.50) | ND (<0.50)  | ND (<0.10)  | ND (<0.10)  | ND (<0.50)  | <b>13</b>   | <b>1.3</b>  |     |    |
|               | CC-SV-10R-15                  |      | 08/01/2016 13:19:00 | ND (<0.50) | ND (<0.50)  | ND (<0.10)  | ND (<0.10)  | ND (<0.50)  | <b>2.8</b>  | <b>0.16</b> |     |    |
|               | CC-SV-10R-15                  |      | 03/07/2017 13:45:00 | ND (<0.50) | ND (<0.50)  | ND (<0.10)  | ND (<0.10)  | ND (<0.50)  | <b>3.0</b>  | <b>0.30</b> |     |    |

**Table S2.** Summary of Detected Volatile Organic Compounds in Soil Vapor Samples at Former Santa Fe Railyard, Boyle Heights, CA [79], Table 2.

|              |                               |    |                     |             |             |             |            |            |             |             |     |    |
|--------------|-------------------------------|----|---------------------|-------------|-------------|-------------|------------|------------|-------------|-------------|-----|----|
| CC-SV-10-40  | CC-SV-10-40',<br>P33722cc     | 40 | 02/12/2013 09:15:00 | ND (<0.20)  | ND (<0.20)  | ND (<0.04)  | ND (<0.04) | ND (<0.20) | <b>6.6</b>  | <b>0.35</b> | 162 | 43 |
| CC-SV-10R-40 | CC-SV-10R-40                  |    | 11/03/2015 13:26:00 | ND (<0.50)  | <b>1.2</b>  | ND (<0.10)  | ND (<0.10) | ND (<0.50) | <b>63</b>   | <b>6.4</b>  |     |    |
|              | CC-SV-10R-40                  |    | 08/01/2016 13:22:00 | ND (<0.50)  | <b>0.88</b> | ND (<0.10)  | ND (<0.10) | ND (<0.50) | <b>53</b>   | <b>7.9</b>  |     |    |
|              | CC-SV-10R-40                  |    | 03/08/2017 11:39:00 | ND (<0.50)  | <b>1.3</b>  | ND (<0.10)  | ND (<0.10) | ND (<0.50) | <b>57</b>   | <b>11</b>   |     |    |
|              | CC-SV-10R-40 REP              |    | 03/08/2017 11:42:00 | ND (<0.50)  | <b>1.0</b>  | ND (<0.10)  | ND (<0.10) | ND (<0.50) | <b>45</b>   | <b>8.2</b>  |     |    |
| CC-SV-10-60  | CC-SV-10-60' Rep,<br>P34070cc | 60 | 02/12/2013 09:36:00 | ND (<0.20)  | <b>1.3</b>  | ND (<0.04)  | ND (<0.04) | ND (<0.20) | <b>38</b>   | <b>4.8</b>  | 236 | 63 |
|              | CC-SV-10-60',<br>P34020cc     |    | 02/12/2013 09:35:00 | ND (<0.20)  | <b>0.83</b> | ND (<0.04)  | ND (<0.04) | ND (<0.20) | <b>25</b>   | <b>3.4</b>  |     |    |
| CC-SV-10R-62 | CC-SV-10R-62                  | 62 | 11/03/2015 13:45:00 | ND (<0.50)  | ND (<0.50)  | ND (<0.10)  | ND (<0.10) | ND (<0.50) | <b>32</b>   | <b>2.4</b>  | 244 | 65 |
|              | CC-SV-10R-62                  |    | 08/02/2016 07:20:00 | ND (<0.50)  | ND (<0.50)  | ND (<0.10)  | ND (<0.10) | ND (<0.50) | <b>8.8</b>  | <b>1.7</b>  |     |    |
|              | CC-SV-10R-62                  |    | 03/08/2017 12:07:00 | ND (<0.50)  | ND (<0.50)  | <b>0.10</b> | ND (<0.10) | ND (<0.50) | <b>12</b>   | <b>1.4</b>  |     |    |
| CC-SV-11-15  | CC-SV-11-15',<br>P33359cc     | 15 | 02/14/2013 07:15:00 | ND (<0.20)  | ND (<0.20)  | ND (<0.04)  | ND (<0.04) | ND (<0.20) | <b>2.0</b>  | <b>0.10</b> | 71  | 19 |
|              | CC-SV-11-15'                  |    | 10/03/2014 08:18:00 | ND (<0.50)  | ND (<0.50)  | <b>0.20</b> | ND (<0.10) | ND (<0.50) | <b>7.1</b>  | <b>0.49</b> |     |    |
| CC-SV-12-15  | CC-SV-12-15',<br>P33359cc     | 15 | 02/13/2013 12:26:00 | ND (<0.20)  | <b>2.3</b>  | ND (<0.04)  | ND (<0.04) | ND (<0.20) | <b>41</b>   | <b>13</b>   | 71  | 19 |
|              | CC-SV-12                      |    | 09/29/2014 11:34:00 | ND (<0.50)  | <b>0.86</b> | ND (<0.10)  | ND (<0.10) | ND (<0.50) | <b>29</b>   | <b>6.8</b>  |     |    |
|              | CC-SV-12-15'                  |    | 10/03/2014 08:29:00 | ND (<0.50)  | ND (<0.50)  | <b>0.12</b> | ND (<0.10) | ND (<0.50) | <b>11</b>   | <b>2.0</b>  |     |    |
|              | CC-SV-12-15                   |    | 11/05/2015 07:26:00 | ND (<0.50)  | ND (<0.50)  | ND (<0.10)  | ND (<0.10) | ND (<0.50) | <b>21</b>   | <b>2.8</b>  |     |    |
|              | CC-SV-12-15 REP               |    | 11/05/2015 07:27:00 | ND (<0.50)  | ND (<0.50)  | ND (<0.10)  | ND (<0.10) | ND (<0.50) | <b>23</b>   | <b>3.1</b>  |     |    |
|              | CC-SV-12-15                   |    | 08/02/2016 13:49:00 | ND (<0.50)  | ND (<0.50)  | ND (<0.10)  | ND (<0.10) | ND (<0.50) | <b>0.98</b> | <b>0.20</b> |     |    |
|              | CC-SV-12-15                   |    | 03/09/2017 10:05:00 | ND (<0.50)  | ND (<0.50)  | ND (<0.10)  | ND (<0.10) | ND (<0.50) | <b>3.2</b>  | <b>0.43</b> |     |    |
| CC-SV-12-45  | CC-SV-12-45',<br>P33747cc     | 45 | 02/13/2013 12:46:00 | ND (<0.20)  | <b>4.0</b>  | ND (<0.04)  | ND (<0.04) | ND (<0.20) | <b>66</b>   | <b>26</b>   | 181 | 48 |
|              | CC-SV-12-45                   |    | 11/05/2015 07:37:00 | ND (<0.50)  | <b>1.8</b>  | ND (<0.10)  | ND (<0.10) | ND (<0.50) | <b>57</b>   | <b>13</b>   |     |    |
|              | CC-SV-12-45                   |    | 08/02/2016 13:51:00 | ND (<0.50)  | ND (<0.50)  | ND (<0.10)  | ND (<0.10) | ND (<0.50) | <b>10</b>   | <b>1.2</b>  |     |    |
|              | CC-SV-12-45                   |    | 03/09/2017 10:19:00 | ND (<0.50)  | ND (<0.50)  | ND (<0.10)  | ND (<0.10) | ND (<0.50) | <b>13</b>   | <b>2.1</b>  |     |    |
|              | CC-SV-12-45                   |    | 03/09/2017 10:19:00 | ND (<0.50)  | ND (<0.50)  | ND (<0.10)  | ND (<0.10) | ND (<0.50) | <b>13</b>   | <b>2.1</b>  |     |    |
| CC-SV-12-60  | CC-SV-12-60,<br>P34007cc      | 60 | 02/13/2013 13:05:00 | ND (<0.20)  | <b>4.2</b>  | ND (<0.04)  | ND (<0.04) | ND (<0.20) | <b>71</b>   | <b>26</b>   | 236 | 63 |
|              | CC-SV-12-66'                  |    | 10/03/2014 08:35:00 | ND (<0.50)  | <b>1.1</b>  | <b>0.13</b> | ND (<0.10) | ND (<0.50) | <b>29</b>   | <b>8.2</b>  |     |    |
|              | CC-SV-12-66                   |    | 11/05/2015 08:00:00 | ND (<0.50)  | <b>1.7</b>  | ND (<0.10)  | ND (<0.10) | ND (<0.50) | <b>48</b>   | <b>12</b>   |     |    |
|              | CC-SV-12-66                   |    | 08/03/2016 07:35:00 | ND (<0.50)  | ND (<0.50)  | ND (<0.10)  | ND (<0.10) | ND (<0.50) | <b>1.1</b>  | <b>0.21</b> |     |    |
|              | CC-SV-12-66 rep               |    | 08/03/2016 07:35:00 | ND (<0.50)  | ND (<0.50)  | ND (<0.10)  | ND (<0.10) | ND (<0.50) | <b>0.95</b> | <b>0.18</b> |     |    |
|              |                               |    |                     | <b>NA</b>   | <b>NA</b>   | <b>NA</b>   | <b>NA</b>  | <b>NA</b>  | <b>NA</b>   | <b>NA</b>   |     |    |
| CC-SV-13-15  | CC-SV-13-15',<br>P33359cc     | 15 | 02/14/2013 07:34:00 | ND (<0.20)  | ND (<0.20)  | ND (<0.04)  | ND (<0.04) | ND (<0.20) | <b>32</b>   | <b>7.5</b>  | 71  | 19 |
| CC-SV-13-C   | CC-SV-13-C,<br>P24960cc       |    | 11/05/2014 07:37:00 | <b>1.0</b>  | ND (<0.50)  | ND (<0.10)  | ND (<0.10) | ND (<0.50) | <b>75</b>   | <b>25</b>   |     |    |
|              | CC-SV-13-C                    |    | 01/23/2015 10:03:00 | <b>0.65</b> | ND (<0.50)  | ND (<0.10)  | ND (<0.10) | ND (<0.50) | <b>59</b>   | <b>15</b>   |     |    |
|              | CC-SV-13-C                    |    | 11/04/2015 11:48:00 | <b>1.1</b>  | ND (<0.50)  | ND (<0.10)  | ND (<0.10) | ND (<0.50) | <b>110</b>  | <b>31</b>   |     |    |
|              | CC-SV-13-C                    |    | 08/02/2016 10:07:00 | ND (<1.0)   | ND (<1.0)   | ND (<0.20)  | ND (<0.20) | ND (<1.0)  | <b>62</b>   | <b>14</b>   |     |    |
|              | CC-SV-13-C rep                |    | 08/02/2016 10:07:00 | ND (<1.0)   | ND (<1.0)   | ND (<0.20)  | ND (<0.20) | ND (<1.0)  | <b>56</b>   | <b>13</b>   |     |    |
|              | CC-SV-13-C                    |    | 03/08/2017 09:15:00 | ND (<0.50)  | ND (<0.50)  | ND (<0.10)  | ND (<0.10) | ND (<0.50) | <b>36</b>   | <b>8.2</b>  |     |    |

**Table S2.** Summary of Detected Volatile Organic Compounds in Soil Vapor Samples at Former Santa Fe Railyard, Boyle Heights, CA [79], Table 2.

|             |                               |    |                     |             |             |            |             |            |            |             |     |    |
|-------------|-------------------------------|----|---------------------|-------------|-------------|------------|-------------|------------|------------|-------------|-----|----|
| CC-SV-13-45 | CC-SV-13-45',<br>P33747cc     | 45 | 02/14/2013 07:55:00 | ND (<0.20)  | ND (<0.20)  | ND (<0.04) | ND (<0.04)  | ND (<0.20) | <b>17</b>  | <b>3.4</b>  | 181 | 48 |
| CC-SV-13-A  | CC-SV-13-A,<br>P24960cc       |    | 11/05/2014 07:12:00 | <b>0.59</b> | ND (<0.50)  | ND (<0.10) | ND (<0.10)  | ND (<0.50) | <b>56</b>  | <b>18</b>   |     |    |
|             | CC-SV-13-A                    |    | 01/23/2015 09:37:00 | ND (<0.50)  | ND (<0.50)  | ND (<0.10) | ND (<0.10)  | ND (<0.50) | <b>61</b>  | <b>15</b>   |     |    |
|             | CC-SV-13-A                    |    | 11/04/2015 11:11:00 | ND (<0.50)  | ND (<0.50)  | ND (<0.10) | ND (<0.10)  | ND (<0.50) | <b>65</b>  | <b>13</b>   |     |    |
|             | CC-SV-13-A                    |    | 08/02/2016 10:30:00 | ND (<0.50)  | ND (<0.50)  | ND (<0.10) | ND (<0.10)  | ND (<0.50) | <b>24</b>  | <b>11</b>   |     |    |
|             | CC-SV-13-A                    |    | 03/08/2017 08:57:00 | ND (<0.50)  | ND (<0.50)  | ND (<0.10) | ND (<0.10)  | ND (<0.50) | <b>25</b>  | <b>4.4</b>  |     |    |
| CC-SV-13-75 | CC-SV-13-75' Rep,<br>P34122cc | 75 | 02/14/2013 08:17:00 | ND (<0.20)  | ND (<0.20)  | ND (<0.04) | <b>0.16</b> | ND (<0.20) | <b>17</b>  | <b>3.3</b>  | 293 | 77 |
|             | CC-SV-13-75',<br>P34072cc     |    | 02/14/2013 08:16:00 | ND (<0.20)  | ND (<0.20)  | ND (<0.04) | <b>0.10</b> | ND (<0.20) | <b>12</b>  | <b>2.2</b>  |     |    |
| CC-SV-13-B  | CC-SV-13-B,<br>P24960cc       |    | 11/05/2014 07:24:00 | ND (<0.50)  | <b>0.60</b> | ND (<0.10) | ND (<0.10)  | ND (<0.50) | <b>37</b>  | <b>10</b>   |     |    |
|             | CC-SV-13-B                    |    | 01/23/2015 09:52:00 | ND (<0.50)  | <b>0.75</b> | ND (<0.10) | ND (<0.10)  | ND (<0.50) | <b>46</b>  | <b>9.5</b>  |     |    |
|             | CC-SV-13-B                    |    | 11/04/2015 11:30:00 | ND (<0.50)  | ND (<0.50)  | ND (<0.10) | ND (<0.10)  | ND (<0.50) | <b>65</b>  | <b>11</b>   |     |    |
|             | CC-SV-13-B                    |    | 08/02/2016 10:33:00 | ND (<0.50)  | ND (<0.50)  | ND (<0.10) | ND (<0.10)  | ND (<0.50) | <b>22</b>  | <b>2.4</b>  |     |    |
|             |                               |    |                     | <b>NA</b>   | <b>NA</b>   | <b>NA</b>  | <b>NA</b>   | <b>NA</b>  | <b>NA</b>  | <b>NA</b>   |     |    |
| CC-SV-14-15 | CC-SV-14-15                   | 15 | 11/03/2015 14:18:00 | ND (<0.50)  | ND (<0.50)  | ND (<0.10) | ND (<0.10)  | ND (<0.50) | <b>22</b>  | <b>1.7</b>  | 71  | 19 |
|             | CC-SV-14-15                   |    | 08/03/2016 08:35:00 | ND (<0.50)  | ND (<0.50)  | ND (<0.10) | ND (<0.10)  | ND (<0.50) | <b>2.2</b> | <b>0.21</b> |     |    |
|             | CC-SV-14-15                   |    | 03/09/2017 08:02:00 | ND (<0.50)  | ND (<0.50)  | ND (<0.10) | ND (<0.10)  | ND (<0.50) | <b>2.5</b> | <b>0.20</b> |     |    |
| CC-SV-14-39 | CC-SV-14-39                   | 39 | 11/04/2015 13:04:00 | ND (<0.50)  | ND (<0.50)  | ND (<0.10) | ND (<0.10)  | ND (<0.50) | <b>52</b>  | <b>3.1</b>  | 159 | 42 |
|             | CC-SV-14-39 REP               |    | 11/04/2015 13:05:00 | ND (<0.50)  | ND (<0.50)  | ND (<0.10) | ND (<0.10)  | ND (<0.50) | <b>57</b>  | <b>3.2</b>  |     |    |
|             | CC-SV-14-39                   |    | 08/03/2016 08:46:00 | ND (<0.50)  | ND (<0.50)  | ND (<0.10) | ND (<0.10)  | ND (<0.50) | <b>13</b>  | <b>0.56</b> |     |    |
|             | CC-SV-14-39                   |    | 03/09/2017 08:15:00 | ND (<0.50)  | ND (<0.50)  | ND (<0.10) | ND (<0.10)  | ND (<0.50) | <b>7.9</b> | <b>0.42</b> |     |    |
| CC-SV-14-55 | CC-SV-14-55                   | 55 | 11/04/2015 14:45:00 | ND (<0.50)  | ND (<0.50)  | ND (<0.10) | ND (<0.10)  | ND (<0.50) | <b>31</b>  | <b>2.3</b>  | 218 | 58 |
|             | CC-SV-14-55                   |    | 08/03/2016 08:49:00 | ND (<0.50)  | ND (<0.50)  | ND (<0.10) | ND (<0.10)  | ND (<0.50) | <b>15</b>  | <b>0.77</b> |     |    |
|             | CC-SV-14-55                   |    | 03/09/2017 08:34:00 | ND (<0.50)  | ND (<0.50)  | ND (<0.10) | ND (<0.10)  | ND (<0.50) | <b>8.3</b> | <b>0.38</b> |     |    |
| CC-SV-15-15 | CC-SV-15-15',<br>P33359cc     | 15 | 02/14/2013 07:32:00 | ND (<0.20)  | ND (<0.20)  | ND (<0.04) | ND (<0.04)  | ND (<0.20) | <b>6.6</b> | <b>0.79</b> | 71  | 19 |
|             | CC-SV-15-15                   |    | 01/23/2015 09:15:00 | ND (<0.50)  | ND (<0.50)  | ND (<0.10) | ND (<0.10)  | ND (<0.50) | <b>25</b>  | <b>3.9</b>  |     |    |
|             | CC-SV-15-15                   |    | 11/04/2015 10:16:00 | ND (<0.50)  | ND (<0.50)  | ND (<0.10) | ND (<0.10)  | ND (<0.50) | <b>30</b>  | <b>4.2</b>  |     |    |
|             | CC-SV-15-15                   |    | 08/02/2016 09:16:00 | ND (<0.50)  | ND (<0.50)  | ND (<0.10) | ND (<0.10)  | ND (<0.50) | <b>8.7</b> | <b>1.6</b>  |     |    |
|             | CC-SV-15-15                   |    | 03/08/2017 08:31:00 | ND (<0.50)  | ND (<0.50)  | ND (<0.10) | ND (<0.10)  | ND (<0.50) | <b>7.4</b> | <b>0.79</b> |     |    |
| CC-SV-16-15 | CC-SV-16-15',<br>P33359cc     | 15 | 02/14/2013 08:33:00 | ND (<0.20)  | ND (<0.20)  | ND (<0.04) | ND (<0.04)  | ND (<0.20) | <b>4.4</b> | <b>0.48</b> | 71  | 19 |
| CC-SV-16-C  | CC-SV-16-C,<br>P24990cc       |    | 11/05/2014 08:59:00 | ND (<0.50)  | ND (<0.50)  | ND (<0.10) | ND (<0.10)  | ND (<0.50) | <b>9.5</b> | <b>1.4</b>  |     |    |
|             | CC-SV-16-C                    |    | 01/23/2015 07:51:00 | ND (<0.50)  | ND (<0.50)  | ND (<0.10) | ND (<0.10)  | ND (<0.50) | <b>7.6</b> | <b>0.81</b> |     |    |
|             | CC-SV-16-C                    |    | 11/04/2015 08:39:00 | ND (<0.50)  | ND (<0.50)  | ND (<0.10) | ND (<0.10)  | ND (<0.50) | <b>15</b>  | <b>1.4</b>  |     |    |
|             | CC-SV-16-C                    |    | 08/02/2016 13:18:00 | ND (<0.50)  | ND (<0.50)  | ND (<0.10) | ND (<0.10)  | ND (<0.50) | <b>1.3</b> | <b>0.17</b> |     |    |
|             | CC-SV-16-C                    |    | 03/08/2017 10:57:00 | ND (<0.50)  | ND (<0.50)  | ND (<0.10) | ND (<0.10)  | ND (<0.50) | <b>1.5</b> | <b>0.21</b> |     |    |
| CC-SV-16-45 | CC-SV-16-45',<br>P33747cc     | 45 | 02/14/2013 08:34:00 | ND (<0.20)  | ND (<0.20)  | ND (<0.04) | ND (<0.04)  | ND (<0.20) | <b>11</b>  | <b>1.5</b>  | 181 | 48 |
| CC-SV-16-B  | CC-SV-16-B,<br>P24990cc       |    | 11/05/2014 08:49:00 | ND (<0.50)  | ND (<0.50)  | ND (<0.10) | ND (<0.10)  | ND (<0.50) | <b>40</b>  | <b>6.1</b>  |     |    |
|             | CC-SV-16-B                    |    | 01/23/2015 07:41:00 | ND (<0.50)  | ND (<0.50)  | ND (<0.10) | ND (<0.10)  | ND (<0.50) | <b>25</b>  | <b>2.3</b>  |     |    |

**Table S2.** Summary of Detected Volatile Organic Compounds in Soil Vapor Samples at Former Santa Fe Railyard, Boyle Heights, CA [79], Table 2.

|             |                           |    |                     |            |            |            |             |             |            |             |     |    |
|-------------|---------------------------|----|---------------------|------------|------------|------------|-------------|-------------|------------|-------------|-----|----|
|             | CC-SV-16-B                |    | 11/04/2015 08:24:00 | ND (<0.50) | ND (<0.50) | ND (<0.10) | ND (<0.10)  | ND (<0.50)  | <b>21</b>  | <b>1.5</b>  |     |    |
|             | CC-SV-16-B                |    | 08/02/2016 12:57:00 | ND (<0.50) | ND (<0.50) | ND (<0.10) | ND (<0.10)  | ND (<0.50)  | <b>4.0</b> | <b>0.49</b> |     |    |
|             | CC-SV-16-B                |    | 03/08/2017 10:43:00 | ND (<0.50) | ND (<0.50) | ND (<0.10) | ND (<0.10)  | ND (<0.50)  | <b>1.2</b> | <b>0.11</b> |     |    |
| CC-SV-16-82 | CC-SV-16-82',<br>P34107cc | 82 | 02/14/2013 08:54:00 | ND (<0.20) | <b>2.3</b> | ND (<0.04) | <b>0.10</b> | ND (<0.20)  | <b>440</b> | <b>31</b>   | 318 | 84 |
| CC-SV-16-A  | CC-SV-16-A,<br>P24990cc   |    | 11/05/2014 08:39:00 | ND (<0.50) | <b>3.5</b> | ND (<0.10) | <b>0.19</b> | ND (<0.50)  | <b>280</b> | <b>46</b>   |     |    |
|             | CC-SV-16-A                |    | 01/23/2015 07:29:00 | ND (<0.50) | <b>4.1</b> | ND (<0.10) | <b>0.23</b> | ND (<0.50)  | <b>300</b> | <b>48</b>   |     |    |
|             | CC-SV-16-A                |    | 11/04/2015 08:09:00 | ND (<0.50) | <b>2.8</b> | ND (<0.10) | <b>0.18</b> | ND (<0.50)  | <b>230</b> | <b>46</b>   |     |    |
|             | CC-SV-16-A                |    | 08/02/2016 12:55:00 | ND (<2.5)  | ND (<2.5)  | ND (<0.50) | ND (<0.50)  | <b>4.1</b>  | <b>130</b> | <b>28</b>   |     |    |
|             |                           |    |                     | NA         | NA         | NA         | NA          | NA          | NA         | NA          |     |    |
| CC-SV-17-15 | CC-SV-17-15',<br>P12762cc | 15 | 11/05/2014 08:21:00 | ND (<0.50) | ND (<0.50) | ND (<0.10) | ND (<0.10)  | ND (<0.50)  | <b>36</b>  | <b>7.8</b>  | 71  | 19 |
|             | CC-SV-17-15               |    | 01/23/2015 08:18:00 | ND (<0.50) | ND (<0.50) | ND (<0.10) | ND (<0.10)  | ND (<0.50)  | <b>35</b>  | <b>6.9</b>  |     |    |
|             | CC-SV-17-15               |    | 11/04/2015 09:13:00 | ND (<0.50) | ND (<0.50) | ND (<0.10) | ND (<0.10)  | ND (<0.50)  | <b>60</b>  | <b>9.2</b>  |     |    |
|             | CC-SV-17-15               |    | 08/02/2016 11:00:00 | ND (<0.50) | ND (<0.50) | ND (<0.10) | ND (<0.10)  | ND (<0.50)  | <b>9.8</b> | <b>2.4</b>  |     |    |
|             | CC-SV-17-15               |    | 03/08/2017 10:15:00 | ND (<0.50) | ND (<0.50) | ND (<0.10) | ND (<0.10)  | ND (<0.50)  | <b>15</b>  | <b>2.9</b>  |     |    |
| CC-SV-17-45 | CC-SV-17-45',<br>P14112cc | 45 | 11/05/2014 08:12:00 | ND (<0.50) | ND (<0.50) | ND (<0.10) | ND (<0.10)  | ND (<0.50)  | <b>55</b>  | <b>11</b>   | 181 | 48 |
|             | CC-SV-17-45               |    | 01/23/2015 08:27:00 | ND (<0.50) | ND (<0.50) | ND (<0.10) | ND (<0.10)  | ND (<0.50)  | <b>61</b>  | <b>11</b>   |     |    |
|             | CC-SV-17-45               |    | 11/04/2015 09:26:00 | ND (<0.50) | ND (<0.50) | ND (<0.10) | ND (<0.10)  | ND (<0.50)  | <b>100</b> | <b>13</b>   |     |    |
|             | CC-SV-17-45               |    | 08/02/2016 10:58:00 | ND (<1.0)  | ND (<1.0)  | ND (<0.20) | ND (<0.20)  | ND (<1.0)   | <b>21</b>  | <b>5.0</b>  |     |    |
|             | CC-SV-17-45               |    | 03/08/2017 09:59:00 | ND (<0.50) | ND (<0.50) | ND (<0.10) | ND (<0.10)  | ND (<0.50)  | <b>19</b>  | <b>3.9</b>  |     |    |
| CC-SV-17-78 | CC-SV-17-78',<br>P24930cc | 78 | 11/05/2014 08:01:00 | ND (<0.50) | <b>2.6</b> | ND (<0.10) | <b>0.31</b> | <b>1.1</b>  | <b>290</b> | <b>48</b>   | 303 | 80 |
|             | CC-SV-17DR-78             |    | 11/04/2015 09:49:00 | ND (<0.50) | <b>1.7</b> | ND (<0.10) | <b>0.14</b> | <b>0.88</b> | <b>210</b> | <b>31</b>   |     |    |
|             | CC-SV-17-78               |    | 08/02/2016 11:16:00 | ND (<4.0)  | ND (<4.0)  | ND (<0.80) | ND (<0.80)  | ND (<4.0)   | <b>46</b>  | <b>8.8</b>  |     |    |
|             |                           |    |                     | NA         | NA         | NA         | NA          | NA          | NA         | NA          |     |    |

**Notes:**

Bgs = Below Ground Surface  
DUP = Field Duplicate  
NA = Denotes Sample not Analyzed  
ND (<X) = Denotes Result was Below the Detection Limit of X µg/L  
µg/L = Micrograms per Liter

Yellow Highlights denote concentrations above the depth specific cleanup goals  
Red Highlights denote samples were not collected due to water in the line

**Table S3.** Violations of the First Safety Benchmark, No “Response-Action” Levels or Environmental Screening Level (ESLs), Indoor Air, Former Naval Ordnance Testing Station, Pasadena, CA [90] (Table 6).

**Table 6.** Violations of the First Safety Benchmark, No “Response-Action” Levels or Environmental Screening Level (ESLs), Indoor Air, Former Naval Ordnance Testing Station, Pasadena, California (NOTSPA). Bold = Violations.

| Contaminant             | “Safe,” No-Response-Action Level <sup>1</sup> = ESL <sup>2</sup><br>µg/m <sup>3</sup> | Detected-Contaminant Levels, µg/m <sup>3</sup>                         |         |                      |                      | Risks of Detected-Contaminant Levels, Based on the 10 <sup>-6</sup> Risk ESLs |                                   |                        |                           |                        |
|-------------------------|---------------------------------------------------------------------------------------|------------------------------------------------------------------------|---------|----------------------|----------------------|-------------------------------------------------------------------------------|-----------------------------------|------------------------|---------------------------|------------------------|
|                         |                                                                                       | Generally Calibrated <sup>3</sup> (Uncalibrated Results) X (1.55–2.31) |         |                      |                      | ESL <sup>2</sup>                                                              | Generally Calibrated <sup>3</sup> |                        | Uncalibrated <sup>4</sup> |                        |
|                         |                                                                                       | Highest Results                                                        |         | Lowest Results       |                      |                                                                               | Highest Risks <sup>5</sup>        | Lowest Risks           | Highest Risks             | Lowest Risks           |
|                         |                                                                                       |                                                                        |         |                      |                      |                                                                               |                                   |                        |                           |                        |
| Carbon tetrachloride    | 0.47 <sup>6</sup>                                                                     | 1.1–1.6                                                                | 1.1–1.6 | 0.679 J <sub>7</sub> | 0.679 J <sup>7</sup> | 10 <sup>-6</sup>                                                              | (3.4) 10 <sup>-6</sup>            | (2.3) 10 <sup>-6</sup> | (1.4) 10 <sup>-6</sup>    | (1.4) 10 <sup>-6</sup> |
| Dichlorodifluoromethane | 0.12 <sup>8</sup>                                                                     | 2.8–4.2                                                                | 0.7–1.1 | 1.83                 | 0.464 J <sup>7</sup> | 10 <sup>-6</sup>                                                              | (3.5) 10 <sup>-5</sup>            | (5.8) 10 <sup>-6</sup> | (1.5)10 <sup>-5</sup>     | (3.9) 10 <sup>-6</sup> |
| Perchloroethylene       | 0.46 <sup>6</sup>                                                                     | 20.8–31.0                                                              | 2.2–3.3 | 13.4                 | 1.43                 | 10 <sup>-6</sup>                                                              | (6.7) 10 <sup>-5</sup>            | (4.8) 10 <sup>-6</sup> | (2.9) 10 <sup>-5</sup>    | (3.1) 10 <sup>-6</sup> |

<sup>1</sup> [17,26,27,40,42]. <sup>2</sup> See Section 2.2.1.3, this paper. <sup>3</sup> See Section 2.2.1.5, this paper. <sup>4</sup> See Section 3.4 and Section 3.4.1, this paper. <sup>5</sup> Given the perchloroethylene (PCE) ESL = 0.46  $\mu\text{g}/\text{m}^3$  (column 2), and the PCE ESL risk of  $10^{-6}$ , one extrapolates to obtain the risk of various detected PCE levels. <sup>6</sup> State of California screening level [42]. <sup>7</sup> J Value is estimated because it is above the Beacon detection limit, thus clearly detected, but below the Beacon quantitation limit; as a result, it is somewhere between the detection and quantitation limits, but clearly above the residential ESL. <sup>8</sup> See Section 2.2.1.6, this paper.

**Table S4.** Violations of the Second Safety Benchmark, No Significant Risk Level (NSRL), Indoor-Air Passive Samplers, Former Naval Ordnance Testing Station, Pasadena, CA [90] (Table 7).

**Table 7.** Violations of the Second Safety Benchmark, No Significant Risk Level (NSRL), Indoor-Air Passive Samplers, Former Naval Ordnance Testing Station, Pasadena, California (NOTSPA). Bold = Violations.

| Contaminant             | “Safe,” No-Response-Action Level <sup>1</sup> = ESL <sup>2</sup> 10 <sup>-6</sup> Risk, µg/m <sup>3</sup> | Detected-Contaminant Levels, µg/m <sup>3</sup> |                |                           |                      | Risks of Detected-Contaminant Levels, Based On The NSRL Or “Safe Harbor” Level, µg/m <sup>3</sup> Per Day |                                   |                              |                              |                              |
|-------------------------|-----------------------------------------------------------------------------------------------------------|------------------------------------------------|----------------|---------------------------|----------------------|-----------------------------------------------------------------------------------------------------------|-----------------------------------|------------------------------|------------------------------|------------------------------|
|                         |                                                                                                           | Generally Calibrated <sup>3</sup>              |                | Uncalibrated <sup>4</sup> |                      | NSRL <sup>5</sup>                                                                                         | Generally Calibrated <sup>3</sup> |                              | Uncalibrated <sup>4</sup>    |                              |
|                         |                                                                                                           | Highest Results                                | Lowest Results | Highest Results           | Lowest Results       |                                                                                                           | Highest Risks <sup>6</sup>        | Lowest Risks                 | Highest Risks                | Lowest Risks                 |
| Carbon tetrachloride    | 0.47 <sup>7</sup>                                                                                         | 1.1–1.6                                        | 1.1–1.6        | 0.679 J <sup>8</sup>      | 0.679 J <sup>8</sup> | 5                                                                                                         | <b>(6.4) 10<sup>-5</sup></b>      | <b>(4.4) 10<sup>-5</sup></b> | <b>(2.7) 10<sup>-5</sup></b> | <b>(2.7) 10<sup>-5</sup></b> |
| Dichlorodifluoromethane | 0.12 <sup>9</sup>                                                                                         | 2.8–4.2                                        | 0.7–1.1        | 1.83                      | 0.464 J <sup>8</sup> | not given                                                                                                 | -                                 | -                            | -                            | -                            |
| Perchloroethylene       | 0.46 <sup>7</sup>                                                                                         | 20.8–31.0                                      | 2.2–3.3        | 13.4                      | 1.43                 | 14                                                                                                        | <b>(4.4) 10<sup>-4</sup></b>      | <b>(3.1) 10<sup>-5</sup></b> | <b>(1.9) 10<sup>-4</sup></b> | <b>(2.0) 10<sup>-5</sup></b> |

<sup>1</sup> [17,26,27,40,42]. <sup>2</sup> See Section 2.2.1.3, this paper and [28]. <sup>3</sup> See Section 2.2.1.5, this paper. <sup>4</sup> See Section 3.4 and Section 3.4.1, this paper. <sup>5</sup> The NSRL of California DTSC is defined in regulations as the daily contaminant-intake level calculated to result in one excess case of cancer in a population of 100,000 exposed people [43]. Per note 2 above, we use the residential NSRL [28]. <sup>6</sup> Given a detected contaminant level/day, associated with the NSRL, this is the generally calibrated risk range represented by (detected level) (20 h) for residential risk and (detected level) (10 h) for commercial risk. <sup>7</sup> State of California screening level [42]. <sup>8</sup> J Value is estimated because it is above the Beacon detection limit, but below the Beacon quantitation limit; as a result, it is somewhere between the detection and quantitation limits, but clearly detected above the residential ESL. <sup>9</sup> See Section 2.2.1.6, this paper.

**Table S5.** Violations of the Third Safety Benchmark, Based on Inhalation Unit Risk (IUR), Indoor-Air Passive Samplers, Former Naval Ordnance Testing Station, Pasadena, CA [90] (Table 8).

**Table 8.** Violations of the Third Safety Benchmark, Based on Inhalation Unit Risk (IUR), Indoor-Air Passive Samplers, Former Naval Ordnance Testing Station, Pasadena, California (NOTSPA). Bold = Violations.

| Contaminant             | “Safe,” No-Response-Action Level <sup>1</sup> = ESL <sup>2</sup><br>10 <sup>-6</sup> Risk, µg/m <sup>3</sup> | Detected-Contaminant Levels, µg/m <sup>3</sup> |                |                           |                      | Risks of Contaminant Levels, Based on the IUR µg/m <sup>3</sup> |                                   |                        |                           |                        |
|-------------------------|--------------------------------------------------------------------------------------------------------------|------------------------------------------------|----------------|---------------------------|----------------------|-----------------------------------------------------------------|-----------------------------------|------------------------|---------------------------|------------------------|
|                         |                                                                                                              | Generally Calibrated <sup>3</sup>              |                | Uncalibrated <sup>4</sup> |                      | IUR <sup>5</sup>                                                | Generally Calibrated <sup>3</sup> |                        | Uncalibrated <sup>4</sup> |                        |
|                         |                                                                                                              | Highest Results                                | Lowest Results | Highest Results           | Lowest Results       |                                                                 | Highest Risks <sup>6</sup>        | Lowest Risks           | Highest Risks             | Lowest Risks           |
| Carbon tetrachloride    | 0.47 <sup>7</sup>                                                                                            | 1.1–1.6                                        | 1.1–1.6        | 0.679 J <sub>8</sub>      | 0.679 J <sub>8</sub> | (4.2) 10 <sup>-5</sup>                                          | (6.7) 10 <sup>-5</sup>            | (4.6) 10 <sup>-5</sup> | (2.9) 10 <sup>-5</sup>    | (2.9) 10 <sup>-5</sup> |
| Dichlorodifluoromethane | 0.12 <sup>9</sup>                                                                                            | 2.8–4.2                                        | 0.7–1.1        | 1.83                      | 0.464 J <sub>8</sub> | not given                                                       | -                                 | -                      | -                         | -                      |
| Perchloroethylene       | 0.46 <sup>7</sup>                                                                                            | 20.8–31.0                                      | 2.2–3.3        | 13.4                      | 1.43                 | (6.1) 10 <sup>-6</sup>                                          | (1.9) 10 <sup>-4</sup>            | (1.3) 10 <sup>-5</sup> | (8.2) 10 <sup>-5</sup>    | (8.7) 10 <sup>-6</sup> |

<sup>1</sup> [17,26,27,40,42]. <sup>2</sup> See Section 2.2.1.3, this paper. <sup>3</sup> See Section 2.2.1.5, this paper. <sup>4</sup> See Section 3.4 and Section 3.4.1, this paper. <sup>5</sup> The Inhalation Unit Risk (IUR) of US EPA "is an estimate of the increased cancer risk from inhalation exposure to a [contaminant] concentration of 1 µg/m<sup>3</sup> for a lifetime" [49]. <sup>6</sup> Given the perchloroethylene (PCE) IUR = 6.1 × 10<sup>-6</sup> (column 7), the PCE inhalation risk for the value of the highest generally calibrated PCE detection of 31 µg/m<sup>3</sup> (column 3) = (PCE IUR) (PCE detected value whose risk we want to know) = (0.0000061) (31) = 0.00019 or 1.9 × 10<sup>-4</sup> inhalation cancer risk. <sup>7</sup> State of California screening level [42]. <sup>8</sup> J Value is estimated because it is above the Beacon detection limit, but below the Beacon quantitation limit; as a result, it is somewhere between the detection and quantitation limits, but above the residential ESL. <sup>9</sup> See Section 2.2.1.6 of this analysis.
